# Supplementary material for: Telescoping bimodal latent Dirichlet allocation to identify expression QTLs across tissues
Source: Life Sci Alliance. 2022 Aug 17;5(12):e202101297. doi: 10.26508/lsa.202101297 (PMC9387650; doi:10.26508/lsa.202101297)
Supplement: Supplementary file 1 [file LSA-2021-01297_TableS1.xls]

## Sheet: GO BP Tissue-Associated GSEA
pvalue	GeneSet	BH_FDR	Tissue
2.38655e-89	GO_IMMUNE_SYSTEM_PROCESS	1.05867e-85	wholeblood
7.39329e-80	GO_IMMUNE_RESPONSE	1.63983e-76	wholeblood
2.82552e-67	GO_REGULATION_OF_IMMUNE_RESPONSE	4.17801e-64	wholeblood
6.51698e-61	GO_REGULATION_OF_IMMUNE_SYSTEM_PROCESS	7.22733e-58	wholeblood
3.57224e-50	GO_DEFENSE_RESPONSE	3.16929e-47	wholeblood
3.5492e-46	GO_POSITIVE_REGULATION_OF_IMMUNE_SYSTEM_PROCESS	2.62404e-43	wholeblood
7.06733e-44	GO_POSITIVE_REGULATION_OF_IMMUNE_RESPONSE	4.47867e-41	wholeblood
2.45809e-41	GO_INNATE_IMMUNE_RESPONSE	1.36301e-38	wholeblood
4.67879e-42	GO_MITOCHONDRION_ORGANIZATION	2.07551e-38	muscleskeletal
1.92302e-41	GO_CELLULAR_RESPIRATION	4.26526e-38	muscleskeletal
9.38929e-40	GO_CELL_ACTIVATION	4.62788e-37	wholeblood
1.01964e-39	GO_ENERGY_DERIVATION_BY_OXIDATION_OF_ORGANIC_COMPOUNDS	1.50771e-36	muscleskeletal
5.94165e-39	GO_RNA_PROCESSING	2.63571e-35	skins
1.92467e-37	GO_LEUKOCYTE_ACTIVATION	8.53784e-35	wholeblood
1.30142e-36	GO_GENERATION_OF_PRECURSOR_METABOLITES_AND_ENERGY	1.44328e-33	muscleskeletal
1.68088e-36	GO_OXIDATIVE_PHOSPHORYLATION	1.49128e-33	muscleskeletal
5.233e-36	GO_ELECTRON_TRANSPORT_CHAIN	3.86893e-33	muscleskeletal
1.21364e-33	GO_ACTIVATION_OF_IMMUNE_RESPONSE	4.8943e-31	wholeblood
3.97866e-33	GO_LYMPHOCYTE_ACTIVATION	1.47078e-30	wholeblood
2.10497e-32	GO_ADAPTIVE_IMMUNE_RESPONSE	7.18281e-30	wholeblood
1.76752e-31	GO_EPIDERMIS_DEVELOPMENT	7.8407e-28	skinsunexposedlowerleg
2.50075e-30	GO_REGULATION_OF_DEFENSE_RESPONSE	7.92382e-28	wholeblood
5.13417e-30	GO_REGULATION_OF_INNATE_IMMUNE_RESPONSE	1.51835e-27	wholeblood
7.23695e-31	GO_MRNA_METABOLIC_PROCESS	1.60516e-27	skins
1.36302e-29	GO_POSITIVE_REGULATION_OF_RESPONSE_TO_STIMULUS	3.77898e-27	wholeblood
1.40812e-29	GO_NUCLEOSIDE_TRIPHOSPHATE_METABOLIC_PROCESS	8.92345e-27	muscleskeletal
5.08145e-30	GO_SKIN_DEVELOPMENT	1.12707e-26	skinsunexposedlowerleg
1.02823e-28	GO_IMMUNE_EFFECTOR_PROCESS	2.68308e-26	wholeblood
1.00954e-27	GO_IMMUNE_RESPONSE_REGULATING_CELL_SURFACE_RECEPTOR_SIGNALING_PATHWAY	2.48796e-25	wholeblood
8.73137e-28	GO_NUCLEOSIDE_MONOPHOSPHATE_METABOLIC_PROCESS	4.84154e-25	muscleskeletal
8.95541e-28	GO_SKIN_DEVELOPMENT	2.06945e-24	skinnotsunexposedsuprapubic
9.33024e-28	GO_EPIDERMIS_DEVELOPMENT	2.06945e-24	skinnotsunexposedsuprapubic
1.22854e-26	GO_REGULATION_OF_CYTOKINE_PRODUCTION	2.86833e-24	wholeblood
3.54042e-26	GO_REGULATION_OF_RESPONSE_TO_STRESS	7.85265e-24	wholeblood
5.50308e-27	GO_RIBONUCLEOPROTEIN_COMPLEX_BIOGENESIS	8.13722e-24	skins
1.08019e-25	GO_LEUKOCYTE_CELL_CELL_ADHESION	2.28178e-23	wholeblood
5.09648e-26	GO_NCRNA_METABOLIC_PROCESS	5.652e-23	skins
1.80712e-24	GO_MITOCHONDRIAL_TRANSLATION	8.90709e-22	muscleskeletal
1.4986e-23	GO_RESPONSE_TO_BIOTIC_STIMULUS	3.02173e-21	wholeblood
1.77987e-23	GO_REGULATION_OF_CELL_ACTIVATION	3.43283e-21	wholeblood
3.37525e-23	GO_LYMPHOCYTE_DIFFERENTIATION	6.23858e-21	wholeblood
9.44107e-24	GO_NCRNA_PROCESSING	8.37612e-21	skins
4.90283e-23	GO_INFLAMMATORY_RESPONSE	8.69958e-21	wholeblood
6.39635e-23	GO_RESPONSE_TO_BACTERIUM	1.09132e-20	wholeblood
9.45598e-23	GO_POSITIVE_REGULATION_OF_DEFENSE_RESPONSE	1.55358e-20	wholeblood
1.88628e-22	GO_POSITIVE_REGULATION_OF_CYTOKINE_PRODUCTION	2.98841e-20	wholeblood
1.67861e-21	GO_POSITIVE_REGULATION_OF_INNATE_IMMUNE_RESPONSE	2.56769e-19	wholeblood
1.22642e-21	GO_MULTI_ORGANISM_METABOLIC_PROCESS	9.06733e-19	skins
7.06495e-21	GO_REGULATION_OF_IMMUNE_EFFECTOR_PROCESS	1.04467e-18	wholeblood
2.51504e-21	GO_MITOCHONDRIAL_RESPIRATORY_CHAIN_COMPLEX_ASSEMBLY	1.11567e-18	muscleskeletal
8.08028e-21	GO_IMMUNE_SYSTEM_DEVELOPMENT	1.15626e-18	wholeblood
1.22203e-20	GO_VESICLE_MEDIATED_TRANSPORT	1.69404e-18	wholeblood
6.47321e-21	GO_TRANSLATIONAL_TERMINATION	2.61047e-18	muscleskeletal
8.92693e-21	GO_ORGANONITROGEN_COMPOUND_METABOLIC_PROCESS	3.29999e-18	muscleskeletal
1.11751e-20	GO_MITOCHONDRIAL_RESPIRATORY_CHAIN_COMPLEX_I_BIOGENESIS	3.8133e-18	muscleskeletal
4.61599e-20	GO_LEUKOCYTE_DIFFERENTIATION	6.20501e-18	wholeblood
1.33343e-19	GO_POSITIVE_REGULATION_OF_CELL_ACTIVATION	1.73973e-17	wholeblood
7.77175e-20	GO_OXIDATION_REDUCTION_PROCESS	2.33556e-17	muscleskeletal
7.89752e-20	GO_TRANSLATIONAL_ELONGATION	2.33556e-17	muscleskeletal
1.53612e-19	GO_MUSCLE_SYSTEM_PROCESS	4.2589e-17	muscleskeletal
4.59137e-19	GO_DEFENSE_RESPONSE_TO_OTHER_ORGANISM	5.81924e-17	wholeblood
5.05169e-19	GO_POSITIVE_REGULATION_OF_IMMUNE_EFFECTOR_PROCESS	6.22481e-17	wholeblood
1.02869e-19	GO_RNA_SPLICING	6.51899e-17	skins
5.82904e-19	GO_CELL_ACTIVATION_INVOLVED_IN_IMMUNE_RESPONSE	6.98855e-17	wholeblood
2.95747e-19	GO_AMIDE_BIOSYNTHETIC_PROCESS	7.71726e-17	muscleskeletal
3.88568e-19	GO_GLYCOSYL_COMPOUND_METABOLIC_PROCESS	9.57603e-17	muscleskeletal
5.37035e-19	GO_PURINE_CONTAINING_COMPOUND_METABOLIC_PROCESS	1.25384e-16	muscleskeletal
3.21603e-20	GO_MITOTIC_CELL_CYCLE	1.42663e-16	esophagusmucosa
1.41482e-18	GO_REGULATION_OF_LEUKOCYTE_MEDIATED_IMMUNITY	1.65162e-16	wholeblood
1.61838e-18	GO_ACTIVATION_OF_INNATE_IMMUNE_RESPONSE	1.8408e-16	wholeblood
1.14882e-18	GO_PEPTIDE_METABOLIC_PROCESS	2.54808e-16	muscleskeletal
1.33805e-18	GO_MUSCLE_CONTRACTION	2.82646e-16	muscleskeletal
2.19463e-19	GO_KERATINOCYTE_DIFFERENTIATION	3.24512e-16	skinsunexposedlowerleg
5.10052e-19	GO_KERATINOCYTE_DIFFERENTIATION	7.54197e-16	skinnotsunexposedsuprapubic
2.24042e-18	GO_RIBOSOME_BIOGENESIS	1.24231e-15	skins
1.8214e-18	GO_EPITHELIUM_DEVELOPMENT	1.8905e-15	skinsunexposedlowerleg
2.13086e-18	GO_EPIDERMAL_CELL_DIFFERENTIATION	1.8905e-15	skinsunexposedlowerleg
4.07988e-18	GO_RRNA_METABOLIC_PROCESS	2.01093e-15	skins
6.85677e-18	GO_MRNA_PROCESSING	3.04166e-15	skins
1.02777e-17	GO_ESTABLISHMENT_OF_PROTEIN_LOCALIZATION_TO_ENDOPLASMIC_RETICULUM	4.14472e-15	skins
8.68754e-17	GO_DEFENSE_RESPONSE_TO_BACTERIUM	9.63448e-15	wholeblood
2.79898e-17	GO_NUCLEAR_TRANSCRIBED_MRNA_CATABOLIC_PROCESS_NONSENSE_MEDIATED_DECAY	1.02885e-14	skins
3.01513e-17	GO_RNA_CATABOLIC_PROCESS	1.02885e-14	skins
1.32883e-16	GO_ENDOCYTOSIS	1.43773e-14	wholeblood
8.28659e-17	GO_NUCLEOBASE_CONTAINING_SMALL_MOLECULE_METABOLIC_PROCESS	1.67088e-14	muscleskeletal
1.08695e-17	GO_CELL_CYCLE_PROCESS	2.41085e-14	esophagusmucosa
2.73085e-16	GO_SINGLE_ORGANISM_CELL_ADHESION	2.8843e-14	wholeblood
3.65694e-16	GO_T_CELL_DIFFERENTIATION	3.7726e-14	wholeblood
3.65512e-17	GO_EPITHELIUM_DEVELOPMENT	4.05353e-14	skinnotsunexposedsuprapubic
2.7436e-17	GO_CELL_CYCLE	4.05687e-14	esophagusmucosa
2.63588e-16	GO_CELLULAR_PROTEIN_COMPLEX_DISASSEMBLY	5.08381e-14	muscleskeletal
2.12505e-16	GO_RNA_SPLICING_VIA_TRANSESTERIFICATION_REACTIONS	6.73336e-14	skins
4.55083e-16	GO_AMIDE_BIOSYNTHETIC_PROCESS	1.34583e-13	skins
1.739e-16	GO_EPIDERMAL_CELL_DIFFERENTIATION	1.54284e-13	skinnotsunexposedsuprapubic
1.7413e-15	GO_RESPONSE_TO_CYTOKINE	1.75555e-13	wholeblood
7.68987e-16	GO_TRANSLATIONAL_INITIATION	2.13202e-13	skins
2.43658e-15	GO_REGULATION_OF_RESPONSE_TO_EXTERNAL_STIMULUS	2.40193e-13	wholeblood
3.58015e-15	GO_CELLULAR_RESPONSE_TO_CYTOKINE_STIMULUS	3.45251e-13	wholeblood
2.16328e-15	GO_MACROMOLECULAR_COMPLEX_DISASSEMBLY	3.99846e-13	muscleskeletal
4.15442e-16	GO_CELL_DIVISION	4.60725e-13	esophagusmucosa
5.00861e-15	GO_RESPONSE_TO_EXTERNAL_STIMULUS	4.72727e-13	wholeblood
5.8656e-15	GO_REGULATION_OF_HOMOTYPIC_CELL_CELL_ADHESION	5.42079e-13	wholeblood
4.66135e-15	GO_CELLULAR_AMIDE_METABOLIC_PROCESS	8.2711e-13	muscleskeletal
9.98932e-15	GO_POSITIVE_REGULATION_OF_MOLECULAR_FUNCTION	9.04339e-13	wholeblood
8.61569e-15	GO_MITOCHONDRIAL_TRANSMEMBRANE_TRANSPORT	1.4407e-12	muscleskeletal
8.76889e-15	GO_ORGANONITROGEN_COMPOUND_BIOSYNTHETIC_PROCESS	1.4407e-12	muscleskeletal
1.55928e-14	GO_MITOCHONDRIAL_TRANSPORT	2.47034e-12	muscleskeletal
2.79323e-14	GO_RESPONSE_TO_MOLECULE_OF_BACTERIAL_ORIGIN	2.47816e-12	wholeblood
1.7147e-14	GO_CELLULAR_PROTEIN_COMPLEX_ASSEMBLY	2.62289e-12	muscleskeletal
4.63918e-14	GO_PROTEIN_MODIFICATION_BY_SMALL_PROTEIN_CONJUGATION_OR_REMOVAL	6.8598e-12	muscleskeletal
4.92439e-14	GO_AEROBIC_RESPIRATION	7.04665e-12	muscleskeletal
8.81898e-14	GO_MYELOID_LEUKOCYTE_ACTIVATION	7.67079e-12	wholeblood
9.65763e-14	GO_PATTERN_RECOGNITION_RECEPTOR_SIGNALING_PATHWAY	8.2387e-12	wholeblood
1.02958e-13	GO_CELLULAR_DEFENSE_RESPONSE	8.61743e-12	wholeblood
9.57627e-14	GO_STRIATED_MUSCLE_CONTRACTION	1.32751e-11	muscleskeletal
1.66343e-13	GO_LEUKOCYTE_MIGRATION	1.36647e-11	wholeblood
1.03877e-13	GO_PROTEIN_UBIQUITINATION	1.39635e-11	muscleskeletal
1.16148e-13	GO_ACTIN_MYOSIN_FILAMENT_SLIDING	1.51539e-11	muscleskeletal
3.43203e-15	GO_CIRCULATORY_SYSTEM_DEVELOPMENT	1.52245e-11	arterytibial
3.7358e-15	GO_NEUROGENESIS	1.6572e-11	nervetibial
7.02539e-14	GO_PROTEIN_LOCALIZATION_TO_ENDOPLASMIC_RETICULUM	1.83321e-11	skins
2.93803e-13	GO_NEGATIVE_REGULATION_OF_IMMUNE_SYSTEM_PROCESS	2.36966e-11	wholeblood
3.68968e-13	GO_CELL_DEATH	2.92275e-11	wholeblood
3.34293e-14	GO_EPIDERMIS_DEVELOPMENT	2.96584e-11	esophagusmucosa
4.40383e-13	GO_PHAGOCYTOSIS	3.42726e-11	wholeblood
5.09694e-13	GO_B_CELL_RECEPTOR_SIGNALING_PATHWAY	3.89828e-11	wholeblood
6.31848e-14	GO_EPITHELIAL_CELL_DIFFERENTIATION	4.67146e-11	skinsunexposedlowerleg
4.27361e-13	GO_PROTEIN_CATABOLIC_PROCESS	5.41649e-11	muscleskeletal
4.80262e-13	GO_PROTEIN_COMPLEX_SUBUNIT_ORGANIZATION	5.91789e-11	muscleskeletal
8.82139e-14	GO_MITOTIC_NUCLEAR_DIVISION	6.52195e-11	esophagusmucosa
1.02246e-12	GO_ANTIGEN_RECEPTOR_MEDIATED_SIGNALING_PATHWAY	7.68749e-11	wholeblood
1.07808e-12	GO_B_CELL_ACTIVATION	7.97057e-11	wholeblood
1.15278e-12	GO_CYTOKINE_MEDIATED_SIGNALING_PATHWAY	8.38319e-11	wholeblood
1.19438e-12	GO_POSITIVE_REGULATION_OF_CELL_COMMUNICATION	8.54563e-11	wholeblood
8.02962e-13	GO_REGULATION_OF_CELLULAR_AMINO_ACID_METABOLIC_PROCESS	9.62686e-11	muscleskeletal
1.59912e-13	GO_KERATINIZATION	1.01339e-10	skinsunexposedlowerleg
1.67818e-12	GO_POSITIVE_REGULATION_OF_LEUKOCYTE_MEDIATED_IMMUNITY	1.18165e-10	wholeblood
1.87195e-13	GO_ORGANELLE_FISSION	1.18628e-10	esophagusmucosa
2.00353e-12	GO_REGULATION_OF_B_CELL_ACTIVATION	1.3887e-10	wholeblood
2.14381e-12	GO_REGULATION_OF_MULTI_ORGANISM_PROCESS	1.46307e-10	wholeblood
2.50044e-12	GO_REGULATION_OF_ADAPTIVE_IMMUNE_RESPONSE	1.6806e-10	wholeblood
2.63037e-13	GO_KERATINIZATION	1.94472e-10	skinnotsunexposedsuprapubic
3.22018e-12	GO_POSITIVE_REGULATION_OF_CATALYTIC_ACTIVITY	2.13204e-10	wholeblood
3.74352e-12	GO_POSITIVE_REGULATION_OF_CELL_CELL_ADHESION	2.4421e-10	wholeblood
4.13673e-12	GO_CYTOKINE_PRODUCTION	2.6595e-10	wholeblood
4.91192e-12	GO_REGULATION_OF_LYMPHOCYTE_MEDIATED_IMMUNITY	3.11276e-10	wholeblood
5.1738e-12	GO_LYMPHOCYTE_ACTIVATION_INVOLVED_IN_IMMUNE_RESPONSE	3.23253e-10	wholeblood
9.87784e-12	GO_REGULATION_OF_CELL_CELL_ADHESION	6.08585e-10	wholeblood
2.75001e-13	GO_REGULATION_OF_CELL_DEVELOPMENT	6.09952e-10	arterytibial
1.09811e-11	GO_REGULATION_OF_LEUKOCYTE_PROLIFERATION	6.67288e-10	wholeblood
1.19191e-11	GO_REGULATION_OF_CYTOKINE_SECRETION	7.14504e-10	wholeblood
6.51845e-12	GO_ACTIN_MEDIATED_CELL_CONTRACTION	7.60943e-10	muscleskeletal
5.37351e-13	GO_NEUROGENESIS	7.94563e-10	arterytibial
4.12632e-13	GO_NEURON_PROJECTION_MORPHOGENESIS	8.305e-10	nervetibial
5.61654e-13	GO_CELL_MORPHOGENESIS_INVOLVED_IN_NEURON_DIFFERENTIATION	8.305e-10	nervetibial
1.52361e-11	GO_FC_RECEPTOR_SIGNALING_PATHWAY	9.01164e-10	wholeblood
1.59791e-11	GO_INTRACELLULAR_SIGNAL_TRANSDUCTION	9.32673e-10	wholeblood
9.34821e-13	GO_NEURON_DEVELOPMENT	1.03672e-09	nervetibial
9.26285e-12	GO_MULTICELLULAR_ORGANISMAL_MOVEMENT	1.05359e-09	muscleskeletal
2.00075e-12	GO_TISSUE_DEVELOPMENT	1.26791e-09	skinnotsunexposedsuprapubic
2.20297e-11	GO_REGULATION_OF_CELL_KILLING	1.26914e-09	wholeblood
2.47487e-12	GO_TISSUE_DEVELOPMENT	1.37231e-09	skinsunexposedlowerleg
2.4761e-12	GO_SISTER_CHROMATID_SEGREGATION	1.373e-09	esophagusmucosa
1.32119e-11	GO_PHOSPHATE_CONTAINING_COMPOUND_METABOLIC_PROCESS	1.4652e-09	muscleskeletal
1.37657e-11	GO_POSTTRANSCRIPTIONAL_REGULATION_OF_GENE_EXPRESSION	1.48938e-09	muscleskeletal
1.49423e-11	GO_SKELETAL_MUSCLE_CONTRACTION	1.5782e-09	muscleskeletal
1.55182e-11	GO_POSITIVE_REGULATION_OF_CATABOLIC_PROCESS	1.58492e-09	muscleskeletal
1.58921e-11	GO_HYDROGEN_ION_TRANSMEMBRANE_TRANSPORT	1.58492e-09	muscleskeletal
1.60778e-11	GO_SMALL_MOLECULE_METABOLIC_PROCESS	1.58492e-09	muscleskeletal
7.132e-12	GO_PEPTIDE_METABOLIC_PROCESS	1.75764e-09	skins
3.59928e-12	GO_CHROMOSOME_SEGREGATION	1.77405e-09	esophagusmucosa
3.27878e-11	GO_HEMOSTASIS	1.8647e-09	wholeblood
1.99488e-11	GO_CELLULAR_COMPONENT_DISASSEMBLY	1.92376e-09	muscleskeletal
8.55152e-12	GO_PROTEIN_TARGETING_TO_MEMBRANE	1.99655e-09	skins
3.87651e-11	GO_FC_GAMMA_RECEPTOR_SIGNALING_PATHWAY	2.17673e-09	wholeblood
4.94101e-12	GO_NUCLEAR_CHROMOSOME_SEGREGATION	2.19183e-09	esophagusmucosa
4.01829e-12	GO_EPITHELIAL_CELL_DIFFERENTIATION	2.22814e-09	skinnotsunexposedsuprapubic
2.02997e-12	GO_REGULATION_OF_CELL_DIFFERENTIATION	2.25124e-09	arterytibial
2.81556e-12	GO_NEURON_PROJECTION_DEVELOPMENT	2.49797e-09	nervetibial
2.73398e-11	GO_MUSCLE_CELL_DEVELOPMENT	2.58041e-09	muscleskeletal
3.86942e-12	GO_NEURON_DIFFERENTIATION	2.86079e-09	nervetibial
1.29637e-11	GO_VIRAL_LIFE_CYCLE	2.87535e-09	skins
3.71275e-11	GO_CELLULAR_CATABOLIC_PROCESS	3.4312e-09	muscleskeletal
6.55983e-11	GO_REGULATION_OF_LYMPHOCYTE_DIFFERENTIATION	3.63742e-09	wholeblood
6.95615e-11	GO_TOLL_LIKE_RECEPTOR_SIGNALING_PATHWAY	3.80956e-09	wholeblood
9.41728e-13	GO_CELL_CELL_ADHESION_VIA_PLASMA_MEMBRANE_ADHESION_MOLECULES	4.17751e-09	lung
1.19342e-12	GO_BLOOD_VESSEL_MORPHOGENESIS	5.294e-09	adiposesubcutaneous
6.30416e-11	GO_MUSCLE_STRUCTURE_DEVELOPMENT	5.7072e-09	muscleskeletal
2.88945e-11	GO_RIBONUCLEOPROTEIN_COMPLEX_SUBUNIT_ORGANIZATION	6.10362e-09	skins
1.13103e-10	GO_REGULATION_OF_LEUKOCYTE_DIFFERENTIATION	6.1186e-09	wholeblood
1.25589e-10	GO_REGULATION_OF_MAST_CELL_ACTIVATION	6.71219e-09	wholeblood
1.50334e-10	GO_REGULATION_OF_TUMOR_NECROSIS_FACTOR_SUPERFAMILY_CYTOKINE_PRODUCTION	7.93909e-09	wholeblood
1.7052e-10	GO_REGULATION_OF_HEMOPOIESIS	8.89912e-09	wholeblood
1.97797e-10	GO_REGULATION_OF_LEUKOCYTE_DEGRANULATION	1.02026e-08	wholeblood
1.26666e-10	GO_REGULATION_OF_CELLULAR_KETONE_METABOLIC_PROCESS	1.12378e-08	muscleskeletal
2.3711e-10	GO_POSITIVE_REGULATION_OF_CELL_ADHESION	1.20899e-08	wholeblood
2.51719e-10	GO_LEUKOCYTE_MEDIATED_IMMUNITY	1.26889e-08	wholeblood
2.90171e-10	GO_REGULATION_OF_ALPHA_BETA_T_CELL_ACTIVATION	1.44629e-08	wholeblood
3.31664e-10	GO_INTERSPECIES_INTERACTION_BETWEEN_ORGANISMS	1.63473e-08	wholeblood
1.99932e-10	GO_TRICARBOXYLIC_ACID_METABOLIC_PROCESS	1.73644e-08	muscleskeletal
2.0355e-10	GO_CELLULAR_MACROMOLECULAR_COMPLEX_ASSEMBLY	1.73644e-08	muscleskeletal
9.66342e-12	GO_VASCULATURE_DEVELOPMENT	2.14335e-08	adiposesubcutaneous
9.87228e-12	GO_HOMOPHILIC_CELL_ADHESION_VIA_PLASMA_MEMBRANE_ADHESION_MOLECULES	2.18967e-08	lung
4.71033e-10	GO_CELLULAR_RESPONSE_TO_BIOTIC_STIMULUS	2.29616e-08	wholeblood
4.76427e-10	GO_REGULATION_OF_LEUKOCYTE_MEDIATED_CYTOTOXICITY	2.29721e-08	wholeblood
3.82187e-11	GO_ENSHEATHMENT_OF_NEURONS	2.42197e-08	nervetibial
5.23631e-10	GO_REGULATION_OF_DEFENSE_RESPONSE_TO_VIRUS_BY_VIRUS	2.49766e-08	wholeblood
3.69866e-10	GO_PROTEASOMAL_PROTEIN_CATABOLIC_PROCESS	3.09571e-08	muscleskeletal
6.5811e-10	GO_REGULATION_OF_TYPE_I_INTERFERON_PRODUCTION	3.10572e-08	wholeblood
4.30391e-10	GO_REGULATION_OF_LIGASE_ACTIVITY	3.53558e-08	muscleskeletal
4.0933e-11	GO_CELL_DEVELOPMENT	3.63158e-08	arterytibial
6.60392e-11	GO_REGULATION_OF_NERVOUS_SYSTEM_DEVELOPMENT	3.66187e-08	nervetibial
8.65106e-10	GO_NEGATIVE_REGULATION_OF_IMMUNE_RESPONSE	4.03959e-08	wholeblood
5.01339e-10	GO_REGULATION_OF_CATABOLIC_PROCESS	4.04353e-08	muscleskeletal
2.1848e-10	GO_SKIN_DEVELOPMENT	4.30545e-08	skins
2.23231e-10	GO_EPIDERMIS_DEVELOPMENT	4.30545e-08	skins
3.00165e-11	GO_BIOLOGICAL_ADHESION	4.43844e-08	lung
9.66302e-10	GO_REGULATION_OF_INTRACELLULAR_SIGNAL_TRANSDUCTION	4.46512e-08	wholeblood
6.23553e-10	GO_REGULATION_OF_CELLULAR_AMINE_METABOLIC_PROCESS	4.93943e-08	muscleskeletal
7.26074e-11	GO_VASCULATURE_DEVELOPMENT	5.36811e-08	arterytibial
2.92799e-10	GO_CELLULAR_AMIDE_METABOLIC_PROCESS	5.41189e-08	skins
6.98243e-10	GO_PROTEOLYSIS	5.41479e-08	muscleskeletal
7.07975e-10	GO_MITOCHONDRIAL_ATP_SYNTHESIS_COUPLED_PROTON_TRANSPORT	5.41479e-08	muscleskeletal
3.08893e-10	GO_TRNA_METABOLIC_PROCESS	5.48099e-08	skins
1.31786e-09	GO_POSITIVE_REGULATION_OF_RESPONSE_TO_EXTERNAL_STIMULUS	6.00406e-08	wholeblood
1.32642e-09	GO_REGULATION_OF_T_CELL_DIFFERENTIATION	6.00406e-08	wholeblood
4.20396e-11	GO_SMALL_MOLECULE_METABOLIC_PROCESS	6.21626e-08	adiposesubcutaneous
8.60902e-10	GO_REGULATION_OF_RNA_STABILITY	6.47281e-08	muscleskeletal
1.65944e-10	GO_CELL_CYCLE_PHASE_TRANSITION	6.69205e-08	esophagusmucosa
1.58259e-09	GO_POSITIVE_REGULATION_OF_INTRACELLULAR_SIGNAL_TRANSDUCTION	7.09129e-08	wholeblood
1.4412e-10	GO_REGULATION_OF_WATER_LOSS_VIA_SKIN	7.10353e-08	skinsunexposedlowerleg
1.15972e-09	GO_PHOSPHORYLATION	8.57418e-08	muscleskeletal
1.77126e-10	GO_PEPTIDE_CROSS_LINKING	8.73033e-08	skinnotsunexposedsuprapubic
1.97983e-09	GO_T_CELL_ACTIVATION_INVOLVED_IN_IMMUNE_RESPONSE	8.78253e-08	wholeblood
2.00187e-09	GO_NEGATIVE_REGULATION_OF_VIRAL_PROCESS	8.79238e-08	wholeblood
1.33497e-09	GO_MUSCLE_ORGAN_DEVELOPMENT	9.70805e-08	muscleskeletal
8.95596e-11	GO_ANGIOGENESIS	9.93216e-08	adiposesubcutaneous
1.4322e-09	GO_AUTOPHAGY	1.02472e-07	muscleskeletal
2.36055e-09	GO_REGULATION_OF_ANTIGEN_RECEPTOR_MEDIATED_SIGNALING_PATHWAY	1.02661e-07	wholeblood
2.39012e-09	GO_POSITIVE_REGULATION_OF_LYMPHOCYTE_MEDIATED_IMMUNITY	1.02937e-07	wholeblood
2.43159e-09	GO_POSITIVE_REGULATION_OF_ADAPTIVE_IMMUNE_RESPONSE	1.03717e-07	wholeblood
1.48169e-09	GO_REGULATION_OF_MUSCLE_ADAPTATION	1.04329e-07	muscleskeletal
2.6208e-09	GO_PLATELET_ACTIVATION	1.10722e-07	wholeblood
1.78993e-09	GO_POSITIVE_REGULATION_OF_LIGASE_ACTIVITY	1.24065e-07	muscleskeletal
3.16386e-09	GO_MYELOID_CELL_ACTIVATION_INVOLVED_IN_IMMUNE_RESPONSE	1.32405e-07	wholeblood
2.05653e-09	GO_REGULATION_OF_CELLULAR_PROTEIN_CATABOLIC_PROCESS	1.38516e-07	muscleskeletal
2.06088e-09	GO_REGULATION_OF_PROTEIN_UBIQUITINATION_INVOLVED_IN_UBIQUITIN_DEPENDENT_PROTEIN_CATABOLIC_PROCESS	1.38516e-07	muscleskeletal
3.47683e-09	GO_NEGATIVE_REGULATION_OF_CYTOKINE_PRODUCTION	1.44088e-07	wholeblood
3.50799e-09	GO_RESPONSE_TO_VIRUS	1.44088e-07	wholeblood
3.05396e-10	GO_CELL_PART_MORPHOGENESIS	1.50526e-07	nervetibial
2.41054e-09	GO_PROTEIN_POLYUBIQUITINATION	1.59599e-07	muscleskeletal
4.06231e-10	GO_CELL_MORPHOGENESIS_INVOLVED_IN_DIFFERENTIATION	1.80204e-07	nervetibial
2.79741e-09	GO_HYDROGEN_TRANSPORT	1.81804e-07	muscleskeletal
2.82789e-09	GO_NIK_NF_KAPPAB_SIGNALING	1.81804e-07	muscleskeletal
4.54374e-09	GO_CELLULAR_RESPONSE_TO_ORGANIC_SUBSTANCE	1.84918e-07	wholeblood
3.06655e-09	GO_ACTIN_FILAMENT_BASED_MOVEMENT	1.94137e-07	muscleskeletal
3.10724e-09	GO_REGULATION_OF_PROTEIN_CATABOLIC_PROCESS	1.94137e-07	muscleskeletal
4.9274e-09	GO_POSITIVE_REGULATION_OF_PROTEIN_METABOLIC_PROCESS	1.98709e-07	wholeblood
5.36446e-09	GO_REGULATION_OF_SYMBIOSIS_ENCOMPASSING_MUTUALISM_THROUGH_PARASITISM	2.14385e-07	wholeblood
3.596e-09	GO_COFACTOR_BIOSYNTHETIC_PROCESS	2.21554e-07	muscleskeletal
5.70353e-09	GO_POSITIVE_REGULATION_OF_NF_KAPPAB_TRANSCRIPTION_FACTOR_ACTIVITY	2.25901e-07	wholeblood
5.80186e-09	GO_REGULATION_OF_CELL_DEATH	2.27762e-07	wholeblood
5.92556e-09	GO_RESPONSE_TO_TYPE_I_INTERFERON	2.30577e-07	wholeblood
6.53375e-09	GO_POSITIVE_REGULATION_OF_CYTOKINE_SECRETION	2.49952e-07	wholeblood
6.53616e-09	GO_POSITIVE_REGULATION_OF_I_KAPPAB_KINASE_NF_KAPPAB_SIGNALING	2.49952e-07	wholeblood
6.63679e-09	GO_POSITIVE_REGULATION_OF_LEUKOCYTE_PROLIFERATION	2.51631e-07	wholeblood
1.61367e-09	GO_DNA_TEMPLATED_TRANSCRIPTION_ELONGATION	2.75317e-07	skins
8.11515e-10	GO_MITOTIC_SISTER_CHROMATID_SEGREGATION	2.9999e-07	esophagusmucosa
9.26724e-10	GO_SKIN_DEVELOPMENT	3.10087e-07	esophagusmucosa
9.78635e-10	GO_CELL_CYCLE_G1_S_PHASE_TRANSITION	3.10087e-07	esophagusmucosa
1.09297e-09	GO_REGULATION_OF_CELL_DIVISION	3.23227e-07	esophagusmucosa
5.42178e-09	GO_ORGANOPHOSPHATE_METABOLIC_PROCESS	3.27812e-07	muscleskeletal
5.4747e-09	GO_ESTABLISHMENT_OF_LOCALIZATION_IN_CELL	3.27812e-07	muscleskeletal
5.54235e-09	GO_MUSCLE_CELL_DIFFERENTIATION	3.27812e-07	muscleskeletal
8.72309e-09	GO_REGULATION_OF_NATURAL_KILLER_CELL_MEDIATED_IMMUNITY	3.27929e-07	wholeblood
3.7266e-10	GO_ORGANIC_ACID_METABOLIC_PROCESS	3.30624e-07	adiposesubcutaneous
9.79135e-09	GO_ALPHA_BETA_T_CELL_ACTIVATION	3.64995e-07	wholeblood
5.13522e-10	GO_CIRCULATORY_SYSTEM_DEVELOPMENT	3.79664e-07	adiposesubcutaneous
8.60452e-10	GO_PEPTIDE_CROSS_LINKING	3.81697e-07	skinsunexposedlowerleg
1.37694e-09	GO_REGULATION_OF_NUCLEAR_DIVISION	3.81757e-07	esophagusmucosa
1.05377e-08	GO_NEGATIVE_REGULATION_OF_MULTI_ORGANISM_PROCESS	3.89543e-07	wholeblood
6.59463e-10	GO_BLOOD_VESSEL_MORPHOGENESIS	4.17911e-07	arterytibial
2.57695e-09	GO_DNA_REPAIR	4.23383e-07	skins
1.06027e-09	GO_GLIAL_CELL_DIFFERENTIATION	4.27577e-07	nervetibial
1.18097e-08	GO_REGULATION_OF_CELL_ADHESION	4.32959e-07	wholeblood
7.94866e-09	GO_SINGLE_ORGANISM_BIOSYNTHETIC_PROCESS	4.63951e-07	muscleskeletal
1.32249e-08	GO_REGULATION_OF_MAST_CELL_ACTIVATION_INVOLVED_IN_IMMUNE_RESPONSE	4.80867e-07	wholeblood
3.1159e-09	GO_DNA_METABOLIC_PROCESS	4.93648e-07	skins
9.06371e-09	GO_ANAPHASE_PROMOTING_COMPLEX_DEPENDENT_CATABOLIC_PROCESS	5.22164e-07	muscleskeletal
1.66012e-08	GO_CYTOKINE_SECRETION	5.98724e-07	wholeblood
1.70371e-08	GO_LEUKOCYTE_PROLIFERATION	6.09488e-07	wholeblood
1.71917e-08	GO_REGULATION_OF_INFLAMMATORY_RESPONSE	6.10099e-07	wholeblood
1.86381e-08	GO_WOUND_HEALING	6.56181e-07	wholeblood
1.21573e-09	GO_SKELETAL_SYSTEM_DEVELOPMENT	6.74124e-07	arterytibial
1.19534e-08	GO_MACROMOLECULE_CATABOLIC_PROCESS	6.79809e-07	muscleskeletal
1.48028e-09	GO_REGULATION_OF_NERVOUS_SYSTEM_DEVELOPMENT	7.03707e-07	arterytibial
1.58635e-09	GO_HEART_DEVELOPMENT	7.03707e-07	arterytibial
2.03735e-08	GO_CELL_CELL_ADHESION	7.11629e-07	wholeblood
1.97862e-09	GO_CELL_PROJECTION_ORGANIZATION	7.31429e-07	nervetibial
1.30369e-08	GO_REGULATION_OF_PROTEIN_MODIFICATION_BY_SMALL_PROTEIN_CONJUGATION_OR_REMOVAL	7.32047e-07	muscleskeletal
1.32844e-08	GO_CATABOLIC_PROCESS	7.36619e-07	muscleskeletal
1.3759e-08	GO_MITOCHONDRIAL_ELECTRON_TRANSPORT_UBIQUINOL_TO_CYTOCHROME_C	7.53517e-07	muscleskeletal
2.35889e-08	GO_REGULATION_OF_INTERFERON_GAMMA_PRODUCTION	8.16154e-07	wholeblood
2.38875e-08	GO_ALPHA_BETA_T_CELL_DIFFERENTIATION	8.16154e-07	wholeblood
2.39179e-08	GO_GRANULOCYTE_ACTIVATION	8.16154e-07	wholeblood
2.42756e-09	GO_NEURON_PROJECTION_GUIDANCE	8.28358e-07	nervetibial
1.55892e-08	GO_ATP_BIOSYNTHETIC_PROCESS	8.43336e-07	muscleskeletal
2.6715e-08	GO_NEGATIVE_REGULATION_OF_VIRAL_GENOME_REPLICATION	9.04638e-07	wholeblood
2.71398e-08	GO_ANTIGEN_PROCESSING_AND_PRESENTATION_OF_ENDOGENOUS_ANTIGEN	9.12062e-07	wholeblood
2.7355e-08	GO_ADAPTIVE_IMMUNE_RESPONSE_BASED_ON_SOMATIC_RECOMBINATION_OF_IMMUNE_RECEPTORS_BUILT_FROM_IMMUNOGLOBULIN_SUPERFAMILY_DOMAINS	9.12383e-07	wholeblood
2.82744e-08	GO_POSITIVE_REGULATION_OF_HYDROLASE_ACTIVITY	9.30588e-07	wholeblood
2.83204e-08	GO_DEFENSE_RESPONSE_TO_GRAM_POSITIVE_BACTERIUM	9.30588e-07	wholeblood
1.83764e-08	GO_COFACTOR_METABOLIC_PROCESS	9.82141e-07	muscleskeletal
3.053e-08	GO_POSITIVE_REGULATION_OF_B_CELL_ACTIVATION	9.95817e-07	wholeblood
3.10099e-08	GO_POSITIVE_REGULATION_OF_PRODUCTION_OF_MOLECULAR_MEDIATOR_OF_IMMUNE_RESPONSE	1.00409e-06	wholeblood
3.15896e-08	GO_REGULATION_OF_I_KAPPAB_KINASE_NF_KAPPAB_SIGNALING	1.01545e-06	wholeblood
2.61175e-09	GO_CELL_MORPHOGENESIS_INVOLVED_IN_DIFFERENTIATION	1.05325e-06	arterytibial
3.48631e-09	GO_REGULATION_OF_NEURON_DIFFERENTIATION	1.10466e-06	nervetibial
3.5523e-08	GO_RESPONSE_TO_INTERFERON_GAMMA	1.13367e-06	wholeblood
3.63833e-08	GO_POSITIVE_REGULATION_OF_MULTICELLULAR_ORGANISMAL_PROCESS	1.15283e-06	wholeblood
8.57581e-09	GO_TRNA_PROCESSING	1.3118e-06	skins
4.44758e-08	GO_B_CELL_DIFFERENTIATION	1.39925e-06	wholeblood
5.2354e-09	GO_POSITIVE_REGULATION_OF_NERVOUS_SYSTEM_DEVELOPMENT	1.54828e-06	nervetibial
5.08427e-08	GO_POSITIVE_REGULATION_OF_INTERFERON_GAMMA_PRODUCTION	1.5883e-06	wholeblood
5.16488e-08	GO_POSITIVE_REGULATION_OF_TUMOR_NECROSIS_FACTOR_SUPERFAMILY_CYTOKINE_PRODUCTION	1.6022e-06	wholeblood
4.5671e-09	GO_EMBRYONIC_MORPHOGENESIS	1.64806e-06	arterytibial
5.33387e-09	GO_NEURON_DIFFERENTIATION	1.64806e-06	arterytibial
5.38451e-09	GO_MUSCLE_STRUCTURE_DEVELOPMENT	1.64806e-06	arterytibial
5.57279e-09	GO_REGULATION_OF_NEURON_DIFFERENTIATION	1.64806e-06	arterytibial
3.21369e-08	GO_FC_EPSILON_RECEPTOR_SIGNALING_PATHWAY	1.69713e-06	muscleskeletal
5.60669e-08	GO_ESTABLISHMENT_OF_PROTEIN_LOCALIZATION	1.72717e-06	wholeblood
3.33298e-08	GO_ENERGY_COUPLED_PROTON_TRANSPORT_DOWN_ELECTROCHEMICAL_GRADIENT	1.73943e-06	muscleskeletal
5.96799e-08	GO_POSITIVE_REGULATION_OF_LEUKOCYTE_DIFFERENTIATION	1.82579e-06	wholeblood
4.145e-09	GO_REGULATION_OF_WATER_LOSS_VIA_SKIN	1.83872e-06	skinnotsunexposedsuprapubic
6.84195e-09	GO_CELL_SUBSTRATE_ADHESION	1.89693e-06	arterytibial
6.91927e-08	GO_POSITIVE_REGULATION_OF_CELL_DEATH	2.10232e-06	wholeblood
7.11136e-08	GO_REGULATION_OF_HYDROLASE_ACTIVITY	2.14599e-06	wholeblood
7.16978e-08	GO_REGULATION_OF_PRODUCTION_OF_MOLECULAR_MEDIATOR_OF_IMMUNE_RESPONSE	2.149e-06	wholeblood
7.38748e-08	GO_INTERFERON_GAMMA_MEDIATED_SIGNALING_PATHWAY	2.19939e-06	wholeblood
4.29562e-08	GO_MACROMOLECULAR_COMPLEX_ASSEMBLY	2.21574e-06	muscleskeletal
2.15271e-09	GO_CELL_CELL_SIGNALING	2.38736e-06	lung
9.23283e-09	GO_NEURON_DEVELOPMENT	2.40923e-06	arterytibial
8.318e-08	GO_REGULATION_OF_T_CELL_PROLIFERATION	2.45991e-06	wholeblood
8.57825e-08	GO_REGULATION_OF_B_CELL_PROLIFERATION	2.52007e-06	wholeblood
1.00055e-08	GO_METAPHASE_PLATE_CONGRESSION	2.61085e-06	esophagusmucosa
1.00392e-08	GO_GLIOGENESIS	2.78338e-06	nervetibial
9.567e-08	GO_LEUKOCYTE_CHEMOTAXIS	2.79205e-06	wholeblood
1.16476e-08	GO_PERIPHERAL_NERVOUS_SYSTEM_DEVELOPMENT	3.03933e-06	nervetibial
1.25186e-08	GO_EPITHELIUM_DEVELOPMENT	3.08514e-06	esophagusmucosa
1.11653e-07	GO_CELLULAR_RESPONSE_TO_INTERFERON_GAMMA	3.23722e-06	wholeblood
1.24903e-07	GO_POSITIVE_REGULATION_OF_ANTIGEN_RECEPTOR_MEDIATED_SIGNALING_PATHWAY	3.58967e-06	wholeblood
1.25428e-07	GO_REGULATION_OF_INTERLEUKIN_6_PRODUCTION	3.58967e-06	wholeblood
2.47747e-08	GO_CHROMOSOME_ORGANIZATION	3.66336e-06	skins
1.53695e-08	GO_ANGIOGENESIS	3.78773e-06	arterytibial
7.61918e-08	GO_POSITIVE_REGULATION_OF_CANONICAL_WNT_SIGNALING_PATHWAY	3.8849e-06	muscleskeletal
1.39046e-07	GO_RESPONSE_TO_FUNGUS	3.95389e-06	wholeblood
8.00201e-08	GO_POSITIVE_REGULATION_OF_PROTEIN_CATABOLIC_PROCESS	3.99869e-06	muscleskeletal
8.02262e-08	GO_RESPONSE_TO_STIMULUS_INVOLVED_IN_REGULATION_OF_MUSCLE_ADAPTATION	3.99869e-06	muscleskeletal
1.42914e-07	GO_REGULATION_OF_INTERLEUKIN_12_PRODUCTION	4.01245e-06	wholeblood
1.42914e-07	GO_POSITIVE_REGULATION_OF_ALPHA_BETA_T_CELL_ACTIVATION	4.01245e-06	wholeblood
1.44516e-07	GO_NEGATIVE_REGULATION_OF_IMMUNE_EFFECTOR_PROCESS	4.03192e-06	wholeblood
8.45894e-08	GO_ER_TO_GOLGI_VESICLE_MEDIATED_TRANSPORT	4.13756e-06	muscleskeletal
8.48779e-08	GO_ANTIGEN_PROCESSING_AND_PRESENTATION_OF_EXOGENOUS_PEPTIDE_ANTIGEN_VIA_MHC_CLASS_I	4.13756e-06	muscleskeletal
3.10742e-08	GO_ESTABLISHMENT_OF_PROTEIN_LOCALIZATION_TO_ORGANELLE	4.44661e-06	skins
7.29295e-09	GO_MONOCARBOXYLIC_ACID_METABOLIC_PROCESS	4.62165e-06	adiposesubcutaneous
9.89107e-08	GO_PURINE_NUCLEOSIDE_MONOPHOSPHATE_BIOSYNTHETIC_PROCESS	4.76921e-06	muscleskeletal
1.73044e-07	GO_REGULATION_OF_REGULATED_SECRETORY_PATHWAY	4.79764e-06	wholeblood
1.78703e-07	GO_REGULATION_OF_VESICLE_MEDIATED_TRANSPORT	4.92376e-06	wholeblood
1.83835e-07	GO_REGULATION_OF_ORGANELLE_ORGANIZATION	5.03389e-06	wholeblood
1.86039e-07	GO_REGULATION_OF_RESPONSE_TO_WOUNDING	5.063e-06	wholeblood
1.09642e-07	GO_MYOFIBRIL_ASSEMBLY	5.22982e-06	muscleskeletal
1.95583e-07	GO_REGULATION_OF_RESPONSE_TO_CYTOKINE_STIMULUS	5.29027e-06	wholeblood
2.57884e-08	GO_POSITIVE_REGULATION_OF_CELL_CYCLE_PROCESS	6.02092e-06	esophagusmucosa
1.27913e-07	GO_POSITIVE_REGULATION_OF_PROTEIN_MODIFICATION_BY_SMALL_PROTEIN_CONJUGATION_OR_REMOVAL	6.03641e-06	muscleskeletal
1.29819e-07	GO_REGULATION_OF_MUSCLE_SYSTEM_PROCESS	6.06187e-06	muscleskeletal
2.25537e-07	GO_POSITIVE_REGULATION_OF_TRANSPORT	6.06354e-06	wholeblood
4.84791e-08	GO_TRANSCRIPTION_ELONGATION_FROM_RNA_POLYMERASE_II_PROMOTER	6.72042e-06	skins
2.57325e-07	GO_RESPONSE_TO_WOUNDING	6.87646e-06	wholeblood
2.69597e-07	GO_REGULATION_OF_CYTOKINE_BIOSYNTHETIC_PROCESS	7.16128e-06	wholeblood
1.58324e-07	GO_INNATE_IMMUNE_RESPONSE_ACTIVATING_CELL_SURFACE_RECEPTOR_SIGNALING_PATHWAY	7.31587e-06	muscleskeletal
2.79837e-07	GO_REGULATION_OF_LYMPHOCYTE_MIGRATION	7.38902e-06	wholeblood
3.31481e-08	GO_REGULATION_OF_MULTICELLULAR_ORGANISMAL_DEVELOPMENT	7.73922e-06	arterytibial
6.25948e-08	GO_DNA_TEMPLATED_TRANSCRIPTION_TERMINATION	8.2507e-06	skins
6.3238e-08	GO_TRANSLATIONAL_ELONGATION	8.2507e-06	skins
3.26186e-07	GO_NATURAL_KILLER_CELL_ACTIVATION	8.56191e-06	wholeblood
1.99394e-07	GO_POSITIVE_REGULATION_OF_CELLULAR_PROTEIN_CATABOLIC_PROCESS	9.11867e-06	muscleskeletal
4.3464e-08	GO_NEURON_PROJECTION_DEVELOPMENT	9.64032e-06	arterytibial
2.22616e-07	GO_HEART_PROCESS	1.00768e-05	muscleskeletal
4.91073e-08	GO_REGULATION_OF_TRANSMEMBRANE_RECEPTOR_PROTEIN_SERINE_THREONINE_KINASE_SIGNALING_PATHWAY	1.03733e-05	arterytibial
3.98924e-07	GO_CHROMATIN_ORGANIZATION	1.04096e-05	wholeblood
2.36278e-07	GO_GOLGI_VESICLE_TRANSPORT	1.05872e-05	muscleskeletal
5.28842e-08	GO_POSITIVE_REGULATION_OF_CELL_DEVELOPMENT	1.06634e-05	arterytibial
8.56312e-08	GO_CELL_DIVISION	1.08531e-05	skins
5.12913e-08	GO_REGULATION_OF_CYTOSKELETON_ORGANIZATION	1.13764e-05	esophagusmucosa
5.60313e-08	GO_EPIDERMAL_CELL_DIFFERENTIATION	1.18359e-05	esophagusmucosa
5.9983e-08	GO_DNA_REPLICATION	1.20948e-05	esophagusmucosa
4.72924e-07	GO_APOPTOTIC_SIGNALING_PATHWAY	1.22684e-05	wholeblood
2.79918e-07	GO_PROTEIN_COMPLEX_BIOGENESIS	1.24171e-05	muscleskeletal
6.60092e-08	GO_CELLULAR_COMPONENT_MORPHOGENESIS	1.27312e-05	arterytibial
5.16275e-07	GO_RESPIRATORY_BURST	1.31112e-05	wholeblood
5.16931e-07	GO_NEUTROPHIL_ACTIVATION_INVOLVED_IN_IMMUNE_RESPONSE	1.31112e-05	wholeblood
5.17235e-07	GO_REGULATION_OF_LEUKOCYTE_APOPTOTIC_PROCESS	1.31112e-05	wholeblood
5.17235e-07	GO_POSITIVE_REGULATION_OF_LYMPHOCYTE_DIFFERENTIATION	1.31112e-05	wholeblood
5.36945e-07	GO_REGULATION_OF_CD4_POSITIVE_ALPHA_BETA_T_CELL_ACTIVATION	1.33814e-05	wholeblood
5.36945e-07	GO_POSITIVE_REGULATION_OF_CELL_KILLING	1.33814e-05	wholeblood
5.36945e-07	GO_T_CELL_SELECTION	1.33814e-05	wholeblood
3.04885e-07	GO_MACROAUTOPHAGY	1.33908e-05	muscleskeletal
5.559e-07	GO_POSITIVE_REGULATION_OF_SECRETION	1.37764e-05	wholeblood
5.70315e-07	GO_REGULATION_OF_B_CELL_RECEPTOR_SIGNALING_PATHWAY	1.40551e-05	wholeblood
7.73546e-08	GO_EMBRYO_DEVELOPMENT	1.42977e-05	arterytibial
5.89571e-07	GO_VESICLE_ORGANIZATION	1.43714e-05	wholeblood
5.89627e-07	GO_REGULATION_OF_ALPHA_BETA_T_CELL_PROLIFERATION	1.43714e-05	wholeblood
5.99364e-07	GO_NEGATIVE_REGULATION_OF_TYPE_I_INTERFERON_PRODUCTION	1.4495e-05	wholeblood
6.01237e-07	GO_PRODUCTION_OF_MOLECULAR_MEDIATOR_OF_IMMUNE_RESPONSE	1.4495e-05	wholeblood
3.34211e-07	GO_MITOCHONDRIAL_ELECTRON_TRANSPORT_CYTOCHROME_C_TO_OXYGEN	1.45349e-05	muscleskeletal
1.73816e-08	GO_REGULATION_OF_ANATOMICAL_STRUCTURE_MORPHOGENESIS	1.5421e-05	lung
6.46342e-07	GO_REGULATION_OF_SEQUENCE_SPECIFIC_DNA_BINDING_TRANSCRIPTION_FACTOR_ACTIVITY	1.54982e-05	wholeblood
1.26067e-07	GO_SPLICEOSOMAL_COMPLEX_ASSEMBLY	1.55342e-05	skins
1.32916e-07	GO_PROTEIN_TARGETING	1.59355e-05	skins
6.85071e-07	GO_RESPONSE_TO_OXYGEN_CONTAINING_COMPOUND	1.63386e-05	wholeblood
3.80552e-07	GO_REGULATION_OF_SKELETAL_MUSCLE_ADAPTATION	1.63896e-05	muscleskeletal
7.15461e-07	GO_POSITIVE_REGULATION_OF_INFLAMMATORY_RESPONSE	1.69721e-05	wholeblood
7.3858e-07	GO_LEUKOCYTE_DEGRANULATION	1.74273e-05	wholeblood
9.89668e-08	GO_EXTRACELLULAR_STRUCTURE_ORGANIZATION	1.75607e-05	arterytibial
7.50581e-07	GO_REGULATION_OF_PROTEIN_COMPLEX_ASSEMBLY	1.76168e-05	wholeblood
1.55082e-07	GO_MACROMOLECULE_CATABOLIC_PROCESS	1.81038e-05	skins
1.15347e-07	GO_REGULATION_OF_NEURON_PROJECTION_DEVELOPMENT	1.90679e-05	arterytibial
1.16058e-07	GO_NEGATIVE_REGULATION_OF_TRANSMEMBRANE_RECEPTOR_PROTEIN_SERINE_THREONINE_KINASE_SIGNALING_PATHWAY	1.90679e-05	arterytibial
3.56168e-08	GO_ORGAN_MORPHOGENESIS	1.97495e-05	adiposesubcutaneous
1.75001e-07	GO_PEPTIDYL_LYSINE_MODIFICATION	1.99052e-05	skins
8.53188e-07	GO_POSITIVE_REGULATION_OF_T_CELL_PROLIFERATION	1.99197e-05	wholeblood
8.98264e-07	GO_POSITIVE_REGULATION_OF_RESPONSE_TO_WOUNDING	2.07852e-05	wholeblood
8.99631e-07	GO_T_CELL_RECEPTOR_SIGNALING_PATHWAY	2.07852e-05	wholeblood
1.08331e-07	GO_CHROMOSOME_LOCALIZATION	2.08937e-05	esophagusmucosa
1.31968e-07	GO_CARDIAC_CHAMBER_DEVELOPMENT	2.09076e-05	arterytibial
1.94053e-07	GO_ESTABLISHMENT_OF_LOCALIZATION_IN_CELL	2.15205e-05	skins
4.50013e-08	GO_ORGANIC_HYDROXY_COMPOUND_METABOLIC_PROCESS	2.21807e-05	adiposesubcutaneous
9.2721e-08	GO_REGULATION_OF_NEURON_PROJECTION_DEVELOPMENT	2.28506e-05	nervetibial
1.51358e-07	GO_CARDIAC_CHAMBER_MORPHOGENESIS	2.31526e-05	arterytibial
2.16741e-07	GO_RIBONUCLEOPROTEIN_COMPLEX_LOCALIZATION	2.34504e-05	skins
1.03425e-06	GO_PROTEIN_LOCALIZATION	2.37718e-05	wholeblood
2.26888e-07	GO_ESTABLISHMENT_OF_PROTEIN_LOCALIZATION_TO_MEMBRANE	2.39637e-05	skins
1.33376e-07	GO_POSITIVE_REGULATION_OF_MITOTIC_CELL_CYCLE	2.39913e-05	esophagusmucosa
1.35208e-07	GO_POSITIVE_REGULATION_OF_CELL_CYCLE	2.39913e-05	esophagusmucosa
1.6613e-07	GO_CENTRAL_NERVOUS_SYSTEM_DEVELOPMENT	2.4565e-05	arterytibial
1.0803e-06	GO_NEGATIVE_REGULATION_OF_CELL_ACTIVATION	2.47021e-05	wholeblood
1.47117e-07	GO_REGULATION_OF_MITOTIC_CELL_CYCLE	2.51004e-05	esophagusmucosa
1.19399e-06	GO_T_CELL_DIFFERENTIATION_INVOLVED_IN_IMMUNE_RESPONSE	2.71617e-05	wholeblood
1.22822e-06	GO_DEFENSE_RESPONSE_TO_VIRUS	2.77979e-05	wholeblood
2.0392e-07	GO_MUSCLE_SYSTEM_PROCESS	2.84313e-05	arterytibial
2.05095e-07	GO_REGULATION_OF_OSTEOBLAST_DIFFERENTIATION	2.84313e-05	arterytibial
6.75708e-07	GO_COENZYME_METABOLIC_PROCESS	2.88216e-05	muscleskeletal
1.29041e-06	GO_REGULATION_OF_RESPONSE_TO_BIOTIC_STIMULUS	2.89981e-05	wholeblood
1.29432e-06	GO_POSITIVE_REGULATION_OF_SEQUENCE_SPECIFIC_DNA_BINDING_TRANSCRIPTION_FACTOR_ACTIVITY	2.89981e-05	wholeblood
1.31528e-06	GO_CHROMATIN_SILENCING	2.93195e-05	wholeblood
1.26047e-07	GO_REGULATION_OF_SYNAPSE_STRUCTURE_OR_ACTIVITY	2.94287e-05	nervetibial
1.8487e-07	GO_KERATINOCYTE_DIFFERENTIATION	3.03734e-05	esophagusmucosa
6.90457e-08	GO_LIPID_METABOLIC_PROCESS	3.06287e-05	adiposesubcutaneous
1.39444e-06	GO_REGULATION_OF_CATABOLIC_PROCESS	3.09287e-05	wholeblood
2.52236e-07	GO_POSITIVE_REGULATION_OF_CELL_DIFFERENTIATION	3.39066e-05	arterytibial
8.39859e-07	GO_STRIATED_MUSCLE_ADAPTATION	3.54821e-05	muscleskeletal
8.49155e-07	GO_STRIATED_MUSCLE_CELL_DIFFERENTIATION	3.55363e-05	muscleskeletal
1.69245e-06	GO_REGULATION_OF_PROTEIN_SERINE_THREONINE_KINASE_ACTIVITY	3.73519e-05	wholeblood
1.79088e-07	GO_GLIAL_CELL_DEVELOPMENT	3.89795e-05	nervetibial
1.84529e-07	GO_CELL_DEVELOPMENT	3.89795e-05	nervetibial
1.83829e-06	GO_POSITIVE_REGULATION_OF_PROTEIN_SECRETION	4.03695e-05	wholeblood
1.86202e-06	GO_REGULATION_OF_INTERFERON_BETA_PRODUCTION	4.06566e-05	wholeblood
1.86969e-06	GO_LYMPHOCYTE_MEDIATED_IMMUNITY	4.06566e-05	wholeblood
2.7391e-07	GO_DNA_REPLICATION_INITIATION	4.23094e-05	esophagusmucosa
2.76595e-07	GO_REGULATION_OF_CHROMOSOME_SEGREGATION	4.23094e-05	esophagusmucosa
3.51602e-07	GO_NEGATIVE_REGULATION_OF_DEVELOPMENTAL_PROCESS	4.58738e-05	arterytibial
2.16479e-06	GO_POSITIVE_REGULATION_OF_HEMOPOIESIS	4.6844e-05	wholeblood
2.20349e-06	GO_ANTIGEN_PROCESSING_AND_PRESENTATION_OF_ENDOGENOUS_PEPTIDE_ANTIGEN	4.74499e-05	wholeblood
2.24828e-06	GO_CELL_CHEMOTAXIS	4.81806e-05	wholeblood
2.28078e-06	GO_I_KAPPAB_KINASE_NF_KAPPAB_SIGNALING	4.86419e-05	wholeblood
1.2098e-06	GO_REGULATION_OF_HEART_CONTRACTION	5.0156e-05	muscleskeletal
6.98828e-08	GO_POSITIVE_REGULATION_OF_PHOSPHORUS_METABOLIC_PROCESS	5.16667e-05	lung
2.56584e-06	GO_REGULATION_OF_EXOCYTOSIS	5.43208e-05	wholeblood
2.57154e-06	GO_REGULATION_OF_REGULATORY_T_CELL_DIFFERENTIATION	5.43208e-05	wholeblood
5.31767e-07	GO_PROTEIN_MODIFICATION_BY_SMALL_PROTEIN_CONJUGATION_OR_REMOVAL	5.48586e-05	skins
2.90242e-07	GO_NEUROLOGICAL_SYSTEM_PROCESS	5.73018e-05	nervetibial
2.97102e-07	GO_TRANSMISSION_OF_NERVE_IMPULSE	5.73018e-05	nervetibial
1.44502e-07	GO_RESPONSE_TO_ENDOGENOUS_STIMULUS	5.82737e-05	adiposesubcutaneous
1.48175e-06	GO_REGULATION_OF_OXIDATIVE_PHOSPHORYLATION	6.08614e-05	muscleskeletal
1.5775e-06	GO_RIBONUCLEOSIDE_TRIPHOSPHATE_BIOSYNTHETIC_PROCESS	6.41998e-05	muscleskeletal
4.40605e-07	GO_DNA_DEPENDENT_DNA_REPLICATION	6.51508e-05	esophagusmucosa
3.25364e-06	GO_POSITIVE_REGULATION_OF_ALPHA_BETA_T_CELL_PROLIFERATION	6.80809e-05	wholeblood
3.25364e-06	GO_PYRIMIDINE_NUCLEOSIDE_CATABOLIC_PROCESS	6.80809e-05	wholeblood
6.77942e-07	GO_KERATINOCYTE_DIFFERENTIATION	6.83489e-05	skins
1.10427e-07	GO_LOCOMOTION	6.99793e-05	lung
1.77245e-06	GO_NEGATIVE_REGULATION_OF_PROTEIN_MODIFICATION_BY_SMALL_PROTEIN_CONJUGATION_OR_REMOVAL	7.14781e-05	muscleskeletal
3.51784e-06	GO_REGULATION_OF_KINASE_ACTIVITY	7.32636e-05	wholeblood
5.82617e-07	GO_POSITIVE_REGULATION_OF_DEVELOPMENTAL_PROCESS	7.38425e-05	arterytibial
1.86201e-06	GO_SARCOMERE_ORGANIZATION	7.44133e-05	muscleskeletal
2.04237e-07	GO_EMBRYONIC_ORGAN_MORPHOGENESIS	7.54995e-05	adiposesubcutaneous
3.76229e-06	GO_INNATE_IMMUNE_RESPONSE_ACTIVATING_CELL_SURFACE_RECEPTOR_SIGNALING_PATHWAY	7.79883e-05	wholeblood
3.82578e-06	GO_REGULATION_OF_SECRETION	7.89355e-05	wholeblood
8.09968e-07	GO_CELLULAR_RESPONSE_TO_DNA_DAMAGE_STIMULUS	7.98448e-05	skins
6.53846e-07	GO_REGULATION_OF_CELL_PROJECTION_ORGANIZATION	8.05684e-05	arterytibial
3.97023e-06	GO_REGULATION_OF_CYTOKINE_PRODUCTION_INVOLVED_IN_IMMUNE_RESPONSE	8.15368e-05	wholeblood
4.09969e-06	GO_POSITIVE_REGULATION_OF_KINASE_ACTIVITY	8.34631e-05	wholeblood
4.10166e-06	GO_PROTEIN_COMPLEX_BIOGENESIS	8.34631e-05	wholeblood
4.17395e-06	GO_REGULATION_OF_PROTEIN_MODIFICATION_PROCESS	8.45463e-05	wholeblood
7.06643e-07	GO_POSITIVE_REGULATION_OF_NEURON_DIFFERENTIATION	8.47207e-05	arterytibial
7.57508e-07	GO_REGULATION_OF_CELLULAR_RESPONSE_TO_GROWTH_FACTOR_STIMULUS	8.6295e-05	arterytibial
7.5868e-07	GO_CARDIAC_SEPTUM_MORPHOGENESIS	8.6295e-05	arterytibial
7.79843e-07	GO_ORGAN_MORPHOGENESIS	8.64845e-05	arterytibial
2.1954e-06	GO_REGULATION_OF_MRNA_METABOLIC_PROCESS	8.69535e-05	muscleskeletal
4.32222e-06	GO_REGULATION_OF_LYMPHOCYTE_APOPTOTIC_PROCESS	8.71516e-05	wholeblood
4.51958e-06	GO_POSITIVE_REGULATION_OF_CYTOKINE_PRODUCTION_INVOLVED_IN_IMMUNE_RESPONSE	9.07187e-05	wholeblood
5.02019e-07	GO_NEGATIVE_REGULATION_OF_NEURON_DIFFERENTIATION	9.27898e-05	nervetibial
4.65212e-06	GO_REGULATION_OF_VIRAL_GENOME_REPLICATION	9.29585e-05	wholeblood
8.7867e-07	GO_ENZYME_LINKED_RECEPTOR_PROTEIN_SIGNALING_PATHWAY	9.30697e-05	arterytibial
9.05043e-07	GO_SENSORY_ORGAN_DEVELOPMENT	9.30697e-05	arterytibial
9.17399e-07	GO_REGULATION_OF_ANATOMICAL_STRUCTURE_MORPHOGENESIS	9.30697e-05	arterytibial
9.23144e-07	GO_REGULATION_OF_CELLULAR_COMPONENT_MOVEMENT	9.30697e-05	arterytibial
4.80231e-06	GO_POSITIVE_REGULATION_OF_LEUKOCYTE_DEGRANULATION	9.46802e-05	wholeblood
4.80231e-06	GO_NEGATIVE_REGULATION_OF_CELL_KILLING	9.46802e-05	wholeblood
4.80231e-06	GO_POSITIVE_REGULATION_OF_MYELOID_LEUKOCYTE_MEDIATED_IMMUNITY	9.46802e-05	wholeblood
5.0792e-06	GO_REGULATION_OF_AUTOPHAGY	9.96962e-05	wholeblood
5.12472e-06	GO_MYELOID_LEUKOCYTE_MEDIATED_IMMUNITY	0.000100147	wholeblood
2.55781e-06	GO_REGULATION_OF_NUCLEOSIDE_METABOLIC_PROCESS	0.000100411	muscleskeletal
1.03788e-06	GO_ANATOMICAL_STRUCTURE_FORMATION_INVOLVED_IN_MORPHOGENESIS	0.000102312	arterytibial
5.34615e-06	GO_GRANULOCYTE_MIGRATION	0.000104016	wholeblood
7.45141e-07	GO_APICAL_JUNCTION_ASSEMBLY	0.000106627	esophagusmucosa
6.08324e-07	GO_NEGATIVE_REGULATION_OF_NERVOUS_SYSTEM_DEVELOPMENT	0.000107941	nervetibial
2.83587e-06	GO_REGULATION_OF_CARDIAC_CONDUCTION	0.00011035	muscleskeletal
5.74355e-06	GO_ANTIGEN_PROCESSING_AND_PRESENTATION	0.000111259	wholeblood
1.15572e-06	GO_REGULATION_OF_OSSIFICATION	0.000111338	arterytibial
1.17964e-06	GO_POSITIVE_REGULATION_OF_CELL_PROJECTION_ORGANIZATION	0.000111338	arterytibial
8.04416e-07	GO_BICELLULAR_TIGHT_JUNCTION_ASSEMBLY	0.000111512	esophagusmucosa
5.7819e-06	GO_REGULATION_OF_ENDOCYTOSIS	0.000111515	wholeblood
1.16494e-06	GO_EPIDERMAL_CELL_DIFFERENTIATION	0.00011234	skins
5.86735e-06	GO_REGULATION_OF_CELLULAR_RESPONSE_TO_STRESS	0.000112673	wholeblood
5.91446e-06	GO_MEMBRANE_BUDDING	0.000113089	wholeblood
5.97897e-06	GO_REGULATION_OF_INTERLEUKIN_1_PRODUCTION	0.000113831	wholeblood
1.23584e-06	GO_POSITIVE_REGULATION_OF_NEURON_PROJECTION_DEVELOPMENT	0.000114212	arterytibial
6.03228e-06	GO_LOCOMOTION	0.000114356	wholeblood
8.59016e-07	GO_CELL_CELL_JUNCTION_ASSEMBLY	0.000115473	esophagusmucosa
3.4053e-07	GO_LIPID_LOCALIZATION	0.000116199	adiposesubcutaneous
6.16055e-06	GO_CHROMOSOME_ORGANIZATION	0.00011629	wholeblood
6.19579e-06	GO_MEMBRANE_ORGANIZATION	0.00011646	wholeblood
6.34291e-06	GO_POSITIVE_REGULATION_OF_LYMPHOCYTE_MIGRATION	0.000118722	wholeblood
3.08122e-06	GO_MITOCHONDRIAL_MEMBRANE_ORGANIZATION	0.000118855	muscleskeletal
1.33939e-06	GO_TUBE_DEVELOPMENT	0.000121256	arterytibial
9.46384e-07	GO_REGULATION_OF_CELL_CYCLE_PROCESS	0.000123475	esophagusmucosa
6.67983e-06	GO_REGULATION_OF_RESPONSE_TO_EXTRACELLULAR_STIMULUS	0.000124503	wholeblood
1.33601e-06	GO_NCRNA_TRANSCRIPTION	0.000126096	skins
1.43731e-06	GO_BONE_DEVELOPMENT	0.000126904	arterytibial
1.45899e-06	GO_NEGATIVE_REGULATION_OF_MULTICELLULAR_ORGANISMAL_PROCESS	0.000126904	arterytibial
2.33917e-07	GO_TUBE_DEVELOPMENT	0.000129707	lung
7.04184e-06	GO_EXTRINSIC_APOPTOTIC_SIGNALING_PATHWAY	0.000130701	wholeblood
7.95267e-07	GO_REGULATION_OF_CELL_DEVELOPMENT	0.000135685	nervetibial
7.48095e-06	GO_POSITIVE_REGULATION_OF_INTERLEUKIN_10_PRODUCTION	0.000138273	wholeblood
7.56855e-06	GO_POSITIVE_REGULATION_OF_TYPE_I_INTERFERON_PRODUCTION	0.000139312	wholeblood
1.57403e-06	GO_DNA_RECOMBINATION	0.000145467	skins
4.59296e-07	GO_VASCULAR_PROCESS_IN_CIRCULATORY_SYSTEM	0.000145531	adiposesubcutaneous
1.17276e-06	GO_CELL_CYCLE_CHECKPOINT	0.000148639	esophagusmucosa
8.247e-06	GO_MYD88_DEPENDENT_TOLL_LIKE_RECEPTOR_SIGNALING_PATHWAY	0.000149933	wholeblood
8.247e-06	GO_LIPOPOLYSACCHARIDE_MEDIATED_SIGNALING_PATHWAY	0.000149933	wholeblood
8.247e-06	GO_REGULATION_OF_INTERLEUKIN_1_SECRETION	0.000149933	wholeblood
8.30064e-06	GO_REGULATION_OF_PROTEIN_SECRETION	0.000150292	wholeblood
5.14724e-07	GO_CIRCULATORY_SYSTEM_PROCESS	0.00015095	adiposesubcutaneous
5.44453e-07	GO_SKELETAL_SYSTEM_MORPHOGENESIS	0.00015095	adiposesubcutaneous
8.38075e-06	GO_NEGATIVE_REGULATION_OF_HOMOTYPIC_CELL_CELL_ADHESION	0.000150958	wholeblood
8.40548e-06	GO_MYELOID_CELL_DIFFERENTIATION	0.000150958	wholeblood
8.65291e-06	GO_T_CELL_PROLIFERATION	0.000154775	wholeblood
1.84403e-06	GO_BIOLOGICAL_ADHESION	0.00015524	arterytibial
1.85476e-06	GO_REGULATION_OF_SYSTEM_PROCESS	0.00015524	arterytibial
4.06393e-06	GO_ORGANIC_ACID_METABOLIC_PROCESS	0.00015541	muscleskeletal
1.90649e-06	GO_CELL_JUNCTION_ASSEMBLY	0.000156615	arterytibial
8.87293e-06	GO_POSITIVE_REGULATION_OF_CYTOKINE_BIOSYNTHETIC_PROCESS	0.000158073	wholeblood
6.09064e-07	GO_SKELETAL_SYSTEM_DEVELOPMENT	0.000158387	adiposesubcutaneous
6.7447e-07	GO_EMBRYONIC_ORGAN_DEVELOPMENT	0.000158387	adiposesubcutaneous
6.99409e-07	GO_ALCOHOL_METABOLIC_PROCESS	0.000158387	adiposesubcutaneous
7.14098e-07	GO_CELLULAR_LIPID_METABOLIC_PROCESS	0.000158387	adiposesubcutaneous
9.89817e-07	GO_SENSORY_PERCEPTION_OF_CHEMICAL_STIMULUS	0.000162623	nervetibial
1.32071e-06	GO_SISTER_CHROMATID_COHESION	0.000162741	esophagusmucosa
4.11349e-07	GO_SPHINGOLIPID_BIOSYNTHETIC_PROCESS	0.000165886	skinsunexposedlowerleg
1.83776e-06	GO_NUCLEIC_ACID_PHOSPHODIESTER_BOND_HYDROLYSIS	0.000166374	skins
2.10016e-06	GO_CELL_JUNCTION_ORGANIZATION	0.00016684	arterytibial
2.10619e-06	GO_APPENDAGE_DEVELOPMENT	0.00016684	arterytibial
1.95561e-06	GO_ESTABLISHMENT_OF_PROTEIN_LOCALIZATION	0.000173502	skins
1.03085e-05	GO_POSITIVE_REGULATION_OF_B_CELL_MEDIATED_IMMUNITY	0.000182915	wholeblood
1.0381e-05	GO_RESPONSE_TO_LIPID	0.000183467	wholeblood
2.3891e-06	GO_SYSTEM_PROCESS	0.00018423	arterytibial
2.40878e-06	GO_CONNECTIVE_TISSUE_DEVELOPMENT	0.00018423	arterytibial
2.50273e-06	GO_CARDIAC_SEPTUM_DEVELOPMENT	0.000188172	arterytibial
5.02352e-06	GO_ANTIGEN_PROCESSING_AND_PRESENTATION_OF_PEPTIDE_ANTIGEN_VIA_MHC_CLASS_I	0.000190464	muscleskeletal
1.14325e-05	GO_LEUKOCYTE_HOMEOSTASIS	0.000201249	wholeblood
1.17533e-05	GO_VACUOLE_ORGANIZATION	0.000206055	wholeblood
1.17985e-05	GO_REGULATION_OF_CYSTEINE_TYPE_ENDOPEPTIDASE_ACTIVITY	0.000206055	wholeblood
1.19198e-05	GO_REGULATION_OF_LYMPHOCYTE_CHEMOTAXIS	0.000207357	wholeblood
2.81577e-06	GO_HEART_MORPHOGENESIS	0.00020818	arterytibial
1.21005e-05	GO_NEGATIVE_REGULATION_OF_DEFENSE_RESPONSE	0.000208736	wholeblood
1.2136e-05	GO_HOMEOSTASIS_OF_NUMBER_OF_CELLS	0.000208736	wholeblood
1.21402e-05	GO_POSITIVE_REGULATION_OF_ESTABLISHMENT_OF_PROTEIN_LOCALIZATION	0.000208736	wholeblood
1.03957e-06	GO_CAMP_METABOLIC_PROCESS	0.000210659	adiposesubcutaneous
1.04475e-06	GO_POSITIVE_REGULATION_OF_MULTICELLULAR_ORGANISMAL_PROCESS	0.000210659	adiposesubcutaneous
1.23719e-05	GO_POSITIVE_REGULATION_OF_CD4_POSITIVE_ALPHA_BETA_T_CELL_ACTIVATION	0.000211899	wholeblood
1.77424e-06	GO_EPITHELIAL_CELL_DIFFERENTIATION	0.000212716	esophagusmucosa
1.25866e-05	GO_NEGATIVE_REGULATION_OF_CELL_DEATH	0.000214747	wholeblood
2.95603e-06	GO_REGULATION_OF_CELL_SUBSTRATE_ADHESION	0.000214966	arterytibial
1.26875e-05	GO_VACUOLAR_TRANSPORT	0.000215639	wholeblood
1.29667e-05	GO_POSITIVE_REGULATION_OF_REGULATED_SECRETORY_PATHWAY	0.000218193	wholeblood
1.29667e-05	GO_REGULATION_OF_ALPHA_BETA_T_CELL_DIFFERENTIATION	0.000218193	wholeblood
1.29853e-05	GO_REGULATION_OF_INTERLEUKIN_8_PRODUCTION	0.000218193	wholeblood
2.56355e-06	GO_SNRNA_METABOLIC_PROCESS	0.000222978	skins
1.33503e-05	GO_REGULATION_OF_LEUKOCYTE_MIGRATION	0.000223479	wholeblood
1.36756e-05	GO_REGULATION_OF_ACTIN_FILAMENT_LENGTH	0.000228064	wholeblood
1.37974e-05	GO_ANTIMICROBIAL_HUMORAL_RESPONSE	0.000229233	wholeblood
3.29055e-06	GO_REGULATION_OF_MUSCLE_SYSTEM_PROCESS	0.000235434	arterytibial
6.33207e-06	GO_PROTEIN_K48_LINKED_UBIQUITINATION	0.000238043	muscleskeletal
1.43966e-05	GO_REGULATION_OF_PROTEIN_LOCALIZATION	0.000238296	wholeblood
1.4501e-05	GO_NEGATIVE_REGULATION_OF_INTERLEUKIN_6_PRODUCTION	0.000239131	wholeblood
1.46117e-05	GO_NEGATIVE_REGULATION_OF_GENE_EXPRESSION_EPIGENETIC	0.000240065	wholeblood
6.86643e-07	GO_ESTABLISHMENT_OR_MAINTENANCE_OF_CELL_POLARITY	0.000241074	skinsunexposedlowerleg
7.06483e-07	GO_NEURON_DIFFERENTIATION	0.000241074	skinsunexposedlowerleg
5.99026e-07	GO_SPHINGOLIPID_BIOSYNTHETIC_PROCESS	0.000241571	skinnotsunexposedsuprapubic
6.55774e-06	GO_REGULATION_OF_TRANSLATIONAL_INITIATION	0.000244455	muscleskeletal
3.62698e-06	GO_NEURON_PROJECTION_MORPHOGENESIS	0.000255386	arterytibial
1.5624e-05	GO_GOLGI_VESICLE_TRANSPORT	0.000255749	wholeblood
5.19989e-07	GO_CELL_CELL_ADHESION	0.000256297	lung
3.75595e-06	GO_REGULATION_OF_NEUROTRANSMITTER_SECRETION	0.000260334	arterytibial
3.84632e-06	GO_CELL_PROJECTION_ORGANIZATION	0.000262153	arterytibial
3.90039e-06	GO_ACTIN_FILAMENT_BASED_PROCESS	0.000262153	arterytibial
1.66705e-05	GO_DENDRITIC_CELL_MIGRATION	0.00027088	wholeblood
1.66705e-05	GO_REGULATION_OF_T_CELL_MEDIATED_CYTOTOXICITY	0.00027088	wholeblood
7.37926e-06	GO_REGULATION_OF_GENERATION_OF_PRECURSOR_METABOLITES_AND_ENERGY	0.000272787	muscleskeletal
1.70204e-05	GO_PROTEIN_SECRETION	0.000275557	wholeblood
7.55099e-06	GO_COENZYME_BIOSYNTHETIC_PROCESS	0.000276828	muscleskeletal
4.18359e-06	GO_SUBSTRATE_ADHESION_DEPENDENT_CELL_SPREADING	0.000276991	arterytibial
1.72434e-05	GO_REGULATION_OF_MAP_KINASE_ACTIVITY	0.000278152	wholeblood
1.74277e-05	GO_REGULATION_OF_TRANSPORT	0.000280105	wholeblood
7.89091e-06	GO_REGULATION_OF_STRIATED_MUSCLE_CONTRACTION	0.000286919	muscleskeletal
4.40569e-06	GO_CARTILAGE_DEVELOPMENT	0.000287406	arterytibial
1.79474e-05	GO_POSITIVE_REGULATION_OF_PROTEIN_MODIFICATION_PROCESS	0.000287417	wholeblood
3.41626e-06	GO_TRANSCRIPTION_FROM_RNA_POLYMERASE_II_PROMOTER	0.000291433	skins
1.87304e-05	GO_REGULATION_OF_CELLULAR_LOCALIZATION	0.000298878	wholeblood
8.54389e-06	GO_FATTY_ACID_BETA_OXIDATION	0.000308136	muscleskeletal
1.70193e-06	GO_REGULATION_OF_ANATOMICAL_STRUCTURE_MORPHOGENESIS	0.000313369	adiposesubcutaneous
1.71466e-06	GO_FATTY_ACID_METABOLIC_PROCESS	0.000313369	adiposesubcutaneous
1.82661e-06	GO_REGULATION_OF_PHOSPHORUS_METABOLIC_PROCESS	0.000313369	adiposesubcutaneous
1.8367e-06	GO_RESPONSE_TO_ACID_CHEMICAL	0.000313369	adiposesubcutaneous
4.96762e-06	GO_REGULATION_OF_CELL_MORPHOGENESIS	0.000319368	arterytibial
2.04352e-05	GO_POSITIVE_REGULATION_OF_INTERLEUKIN_1_SECRETION	0.000324913	wholeblood
2.05849e-05	GO_NEGATIVE_REGULATION_OF_MOLECULAR_FUNCTION	0.000326124	wholeblood
2.0897e-05	GO_REGULATION_OF_PHOSPHORUS_METABOLIC_PROCESS	0.00032989	wholeblood
2.13911e-05	GO_REGULATION_OF_BODY_FLUID_LEVELS	0.000336493	wholeblood
2.88712e-06	GO_REGULATION_OF_ORGANELLE_ORGANIZATION	0.000337034	esophagusmucosa
2.131e-06	GO_NEGATIVE_REGULATION_OF_CELL_DEVELOPMENT	0.000337612	nervetibial
1.0724e-06	GO_ORGAN_MORPHOGENESIS	0.000339798	skinsunexposedlowerleg
2.16816e-05	GO_REGULATION_OF_INTERLEUKIN_10_PRODUCTION	0.000339857	wholeblood
3.09603e-06	GO_CELL_JUNCTION_ORGANIZATION	0.000343587	esophagusmucosa
3.09817e-06	GO_CHROMOSOME_ORGANIZATION	0.000343587	esophagusmucosa
5.42569e-06	GO_TISSUE_DEVELOPMENT	0.000343834	arterytibial
2.21664e-05	GO_ENDOMEMBRANE_SYSTEM_ORGANIZATION	0.000346233	wholeblood
3.24796e-06	GO_REGULATION_OF_MICROTUBULE_BASED_PROCESS	0.000351413	esophagusmucosa
9.85917e-06	GO_MONOVALENT_INORGANIC_CATION_TRANSPORT	0.000352704	muscleskeletal
1.19848e-06	GO_ESTABLISHMENT_OF_CELL_POLARITY	0.00035443	skinsunexposedlowerleg
5.6886e-06	GO_CELL_MORPHOGENESIS_INVOLVED_IN_NEURON_DIFFERENTIATION	0.000355417	arterytibial
2.29763e-05	GO_REGULATION_OF_T_CELL_RECEPTOR_SIGNALING_PATHWAY	0.000357624	wholeblood
8.25511e-07	GO_POSITIVE_REGULATION_OF_MULTICELLULAR_ORGANISMAL_PROCESS	0.000366197	lung
4.40201e-06	GO_PROTEIN_LOCALIZATION_TO_ORGANELLE	0.00036844	skins
2.27328e-06	GO_SMALL_MOLECULE_CATABOLIC_PROCESS	0.000373491	adiposesubcutaneous
2.41829e-05	GO_POSITIVE_REGULATION_OF_INTERLEUKIN_1_PRODUCTION	0.000373782	wholeblood
2.41829e-05	GO_VIRION_ASSEMBLY	0.000373782	wholeblood
2.43263e-05	GO_PYRIMIDINE_CONTAINING_COMPOUND_CATABOLIC_PROCESS	0.000374693	wholeblood
2.46554e-05	GO_CD4_POSITIVE_ALPHA_BETA_T_CELL_ACTIVATION	0.000378448	wholeblood
2.41739e-06	GO_ORGANIC_ACID_CATABOLIC_PROCESS	0.000382224	adiposesubcutaneous
2.54292e-06	GO_HEART_MORPHOGENESIS	0.000382224	adiposesubcutaneous
2.71966e-06	GO_EMBRYONIC_SKELETAL_SYSTEM_DEVELOPMENT	0.000382224	adiposesubcutaneous
2.71966e-06	GO_POSITIVE_REGULATION_OF_LIPID_METABOLIC_PROCESS	0.000382224	adiposesubcutaneous
2.75725e-06	GO_NEGATIVE_REGULATION_OF_CELL_COMMUNICATION	0.000382224	adiposesubcutaneous
1.08353e-05	GO_T_CELL_RECEPTOR_SIGNALING_PATHWAY	0.000384525	muscleskeletal
1.51862e-06	GO_NEUROGENESIS	0.000390428	skinsunexposedlowerleg
1.56356e-06	GO_KERATINOCYTE_PROLIFERATION	0.000390428	skinsunexposedlowerleg
1.58424e-06	GO_MEMBRANE_LIPID_BIOSYNTHETIC_PROCESS	0.000390428	skinsunexposedlowerleg
2.55997e-05	GO_TRANSMEMBRANE_RECEPTOR_PROTEIN_TYROSINE_KINASE_SIGNALING_PATHWAY	0.000391587	wholeblood
3.16161e-06	GO_POSITIVE_REGULATION_OF_ENDOTHELIAL_CELL_MIGRATION	0.000402646	adiposesubcutaneous
3.18537e-06	GO_CELL_DEVELOPMENT	0.000402646	adiposesubcutaneous
3.32008e-06	GO_MESENCHYME_DEVELOPMENT	0.000402646	adiposesubcutaneous
3.45579e-06	GO_LOCOMOTION	0.000402646	adiposesubcutaneous
3.46251e-06	GO_STEM_CELL_DIFFERENTIATION	0.000402646	adiposesubcutaneous
3.46251e-06	GO_DEVELOPMENTAL_MATURATION	0.000402646	adiposesubcutaneous
3.53994e-06	GO_EMBRYONIC_MORPHOGENESIS	0.000402646	adiposesubcutaneous
6.64786e-06	GO_INTEGRIN_MEDIATED_SIGNALING_PATHWAY	0.000405476	arterytibial
6.67262e-06	GO_REGULATED_EXOCYTOSIS	0.000405476	arterytibial
6.77402e-06	GO_REGULATION_OF_CELLULAR_RESPONSE_TO_TRANSFORMING_GROWTH_FACTOR_BETA_STIMULUS	0.000406075	arterytibial
2.6776e-05	GO_REGULATION_OF_INTERFERON_ALPHA_PRODUCTION	0.000406346	wholeblood
2.68394e-05	GO_RESPONSE_TO_MURAMYL_DIPEPTIDE	0.000406346	wholeblood
2.68394e-05	GO_POSITIVE_REGULATION_OF_MAST_CELL_ACTIVATION	0.000406346	wholeblood
3.9285e-06	GO_DNA_CONFORMATION_CHANGE	0.000414924	esophagusmucosa
3.87561e-06	GO_PATTERN_SPECIFICATION_PROCESS	0.000415775	adiposesubcutaneous
3.90389e-06	GO_EMBRYO_DEVELOPMENT	0.000415775	adiposesubcutaneous
3.93656e-06	GO_POSITIVE_REGULATION_OF_PHOSPHORUS_METABOLIC_PROCESS	0.000415775	adiposesubcutaneous
1.04292e-06	GO_REGULATION_OF_CELL_MORPHOGENESIS	0.000420583	lung
1.20464e-05	GO_MUSCLE_FIBER_DEVELOPMENT	0.000424109	muscleskeletal
4.22919e-06	GO_LIPID_HOMEOSTASIS	0.000426379	adiposesubcutaneous
4.22919e-06	GO_POSITIVE_REGULATION_OF_EPITHELIAL_CELL_MIGRATION	0.000426379	adiposesubcutaneous
4.40643e-06	GO_DICARBOXYLIC_ACID_METABOLIC_PROCESS	0.000434376	adiposesubcutaneous
7.50314e-06	GO_NEGATIVE_REGULATION_OF_CELL_DIFFERENTIATION	0.000443786	arterytibial
3.02883e-05	GO_REGULATION_OF_TOLL_LIKE_RECEPTOR_SIGNALING_PATHWAY	0.000457003	wholeblood
3.03519e-06	GO_CELLULAR_COMPONENT_MORPHOGENESIS	0.00046428	nervetibial
4.84654e-06	GO_CELLULAR_LIPID_CATABOLIC_PROCESS	0.000467375	adiposesubcutaneous
8.17251e-06	GO_UROGENITAL_SYSTEM_DEVELOPMENT	0.000477017	arterytibial
5.81528e-06	GO_TERMINATION_OF_RNA_POLYMERASE_II_TRANSCRIPTION	0.000477714	skins
5.0639e-06	GO_REGIONALIZATION	0.000477946	adiposesubcutaneous
4.65486e-06	GO_NEGATIVE_REGULATION_OF_MITOTIC_CELL_CYCLE	0.000480208	esophagusmucosa
5.9716e-06	GO_INTERSPECIES_INTERACTION_BETWEEN_ORGANISMS	0.000481636	skins
3.2396e-05	GO_CHEMOKINE_MEDIATED_SIGNALING_PATHWAY	0.000487148	wholeblood
5.38334e-06	GO_PRIMARY_ALCOHOL_METABOLIC_PROCESS	0.00049751	adiposesubcutaneous
3.32844e-05	GO_FC_EPSILON_RECEPTOR_SIGNALING_PATHWAY	0.000498816	wholeblood
6.29738e-06	GO_RNA_3_END_PROCESSING	0.000498842	skins
1.46226e-05	GO_NUCLEOSIDE_MONOPHOSPHATE_BIOSYNTHETIC_PROCESS	0.000507291	muscleskeletal
1.46378e-05	GO_PROTEIN_MODIFICATION_BY_SMALL_PROTEIN_REMOVAL	0.000507291	muscleskeletal
3.51513e-05	GO_HUMORAL_IMMUNE_RESPONSE	0.00052502	wholeblood
9.29413e-06	GO_POSITIVE_REGULATION_OF_NERVOUS_SYSTEM_DEVELOPMENT	0.000535439	arterytibial
1.56225e-05	GO_DNA_TEMPLATED_TRANSCRIPTION_INITIATION	0.00053722	muscleskeletal
1.59129e-05	GO_NUCLEOSIDE_TRIPHOSPHATE_BIOSYNTHETIC_PROCESS	0.000542996	muscleskeletal
1.49267e-06	GO_STEM_CELL_DIFFERENTIATION	0.000548313	lung
1.60687e-06	GO_REGULATION_OF_PHOSPHORUS_METABOLIC_PROCESS	0.000548313	lung
1.64183e-05	GO_DICARBOXYLIC_ACID_METABOLIC_PROCESS	0.000555966	muscleskeletal
1.65972e-05	GO_POSITIVE_REGULATION_OF_RESPONSE_TO_EXTRACELLULAR_STIMULUS	0.000557765	muscleskeletal
3.7985e-05	GO_POSITIVE_REGULATION_OF_MAST_CELL_ACTIVATION_INVOLVED_IN_IMMUNE_RESPONSE	0.000565442	wholeblood
3.82016e-05	GO_REGULATION_OF_PHAGOCYTOSIS	0.000566764	wholeblood
3.88056e-05	GO_TUMOR_NECROSIS_FACTOR_MEDIATED_SIGNALING_PATHWAY	0.000573806	wholeblood
7.54911e-06	GO_ORGANONITROGEN_COMPOUND_BIOSYNTHETIC_PROCESS	0.000587506	skins
3.99498e-05	GO_LYMPHOCYTE_HOMEOSTASIS	0.000588761	wholeblood
4.01679e-05	GO_POSITIVE_REGULATION_OF_ORGANELLE_ORGANIZATION	0.000590016	wholeblood
1.77104e-05	GO_RETROGRADE_VESICLE_MEDIATED_TRANSPORT_GOLGI_TO_ER	0.000590701	muscleskeletal
1.04125e-05	GO_MUSCLE_CELL_DIFFERENTIATION	0.000592176	arterytibial
4.18644e-05	GO_POSITIVE_REGULATION_OF_EXOCYTOSIS	0.000612906	wholeblood
4.24731e-05	GO_INTERACTION_WITH_HOST	0.000617528	wholeblood
4.25977e-05	GO_POSITIVE_REGULATION_OF_LYMPHOCYTE_APOPTOTIC_PROCESS	0.000617528	wholeblood
4.25977e-05	GO_DETECTION_OF_OTHER_ORGANISM	0.000617528	wholeblood
8.34958e-06	GO_PROTEIN_LOCALIZATION	0.000638599	skins
7.10321e-06	GO_CELL_MOTILITY	0.00063913	adiposesubcutaneous
7.2039e-06	GO_REGULATION_OF_LIPID_METABOLIC_PROCESS	0.00063913	adiposesubcutaneous
7.41025e-06	GO_ANTERIOR_POSTERIOR_PATTERN_SPECIFICATION	0.000641325	adiposesubcutaneous
7.51779e-06	GO_RESPONSE_TO_OXYGEN_CONTAINING_COMPOUND	0.000641325	adiposesubcutaneous
4.44445e-05	GO_NEGATIVE_REGULATION_OF_RESPONSE_TO_STIMULUS	0.000642201	wholeblood
6.43012e-06	GO_NEGATIVE_REGULATION_OF_CELL_CYCLE_PROCESS	0.000648273	esophagusmucosa
9.10458e-06	GO_NUCLEAR_EXPORT	0.000684541	skins
9.28126e-06	GO_PROTEIN_LOCALIZATION_TO_MEMBRANE	0.000686194	skins
1.86031e-06	GO_KERATINOCYTE_PROLIFERATION	0.000687696	skinnotsunexposedsuprapubic
1.26015e-05	GO_OUTFLOW_TRACT_MORPHOGENESIS	0.000707599	arterytibial
8.57958e-06	GO_CELL_MORPHOGENESIS_INVOLVED_IN_DIFFERENTIATION	0.000718095	adiposesubcutaneous
4.98717e-05	GO_PYRIMIDINE_RIBONUCLEOSIDE_CATABOLIC_PROCESS	0.000718281	wholeblood
5.0374e-05	GO_POSITIVE_REGULATION_OF_INTERLEUKIN_8_PRODUCTION	0.000720836	wholeblood
5.0374e-05	GO_NEGATIVE_REGULATION_OF_LEUKOCYTE_MEDIATED_IMMUNITY	0.000720836	wholeblood
4.9198e-06	GO_SCHWANN_CELL_DIFFERENTIATION	0.000727475	nervetibial
2.13438e-06	GO_MEMBRANE_LIPID_METABOLIC_PROCESS	0.000728315	skinnotsunexposedsuprapubic
2.2583e-05	GO_PROTEIN_LOCALIZATION_TO_MITOCHONDRION	0.000747598	muscleskeletal
2.37572e-06	GO_MOVEMENT_IN_ENVIRONMENT_OF_OTHER_ORGANISM_INVOLVED_IN_SYMBIOTIC_INTERACTION	0.000752765	lung
1.36067e-05	GO_REGULATION_OF_MUSCLE_CONTRACTION	0.000754492	arterytibial
5.34608e-05	GO_BIOLOGICAL_ADHESION	0.000762547	wholeblood
2.418e-06	GO_MEMBRANE_LIPID_BIOSYNTHETIC_PROCESS	0.000766161	skinnotsunexposedsuprapubic
9.35386e-06	GO_ADENYLATE_CYCLASE_MODULATING_G_PROTEIN_COUPLED_RECEPTOR_SIGNALING_PATHWAY	0.000768402	adiposesubcutaneous
5.42084e-05	GO_POSITIVE_REGULATION_OF_LEUKOCYTE_MIGRATION	0.000770732	wholeblood
5.41045e-06	GO_REGULATION_OF_AXONOGENESIS	0.000774218	nervetibial
5.54162e-05	GO_POSITIVE_T_CELL_SELECTION	0.000785387	wholeblood
1.436e-05	GO_EXOCYTOSIS	0.000786434	arterytibial
2.4507e-05	GO_GLYOXYLATE_METABOLIC_PROCESS	0.000805283	muscleskeletal
3.45504e-06	GO_MEMBRANE_LIPID_METABOLIC_PROCESS	0.00080666	skinsunexposedlowerleg
2.48882e-05	GO_REGULATION_OF_COFACTOR_METABOLIC_PROCESS	0.000811794	muscleskeletal
2.52459e-05	GO_NON_CANONICAL_WNT_SIGNALING_PATHWAY	0.000817452	muscleskeletal
8.30101e-06	GO_REGULATION_OF_CELL_CYCLE	0.000818295	esophagusmucosa
5.86471e-05	GO_POSITIVE_REGULATION_OF_ENDOCYTOSIS	0.000828531	wholeblood
5.90569e-05	GO_SMALL_GTPASE_MEDIATED_SIGNAL_TRANSDUCTION	0.000831672	wholeblood
3.76479e-06	GO_MOLTING_CYCLE	0.00083503	skinsunexposedlowerleg
5.96744e-05	GO_PHOSPHORYLATION	0.000837707	wholeblood
6.07728e-05	GO_REGULATION_OF_B_CELL_MEDIATED_IMMUNITY	0.000847762	wholeblood
6.07728e-05	GO_EXTRINSIC_APOPTOTIC_SIGNALING_PATHWAY_VIA_DEATH_DOMAIN_RECEPTORS	0.000847762	wholeblood
6.1406e-05	GO_POSITIVE_REGULATION_OF_INTERLEUKIN_6_PRODUCTION	0.000853909	wholeblood
4.06464e-06	GO_MULTICELLULAR_ORGANISMAL_WATER_HOMEOSTASIS	0.000858608	skinsunexposedlowerleg
1.59875e-05	GO_PLATELET_DEGRANULATION	0.000864886	arterytibial
6.24875e-06	GO_REGULATION_OF_SYNAPSE_ORGANIZATION	0.000866233	nervetibial
1.6528e-05	GO_HEAD_DEVELOPMENT	0.000868886	arterytibial
1.65637e-05	GO_OUTFLOW_TRACT_SEPTUM_MORPHOGENESIS	0.000868886	arterytibial
1.66491e-05	GO_CELL_MATRIX_ADHESION	0.000868886	arterytibial
2.71034e-05	GO_ENDOMEMBRANE_SYSTEM_ORGANIZATION	0.000871236	muscleskeletal
6.35929e-05	GO_REGULATION_OF_DEFENSE_RESPONSE_TO_VIRUS	0.000881557	wholeblood
6.40959e-05	GO_REGULATION_OF_TYPE_2_IMMUNE_RESPONSE	0.000885762	wholeblood
1.7279e-05	GO_MUSCLE_CONTRACTION	0.000891277	arterytibial
3.0632e-06	GO_VASCULAR_PROCESS_IN_CIRCULATORY_SYSTEM	0.000892773	lung
3.42006e-06	GO_NEUROGENESIS	0.000892773	lung
3.42136e-06	GO_REGULATION_OF_MAPK_CASCADE	0.000892773	lung
6.51968e-05	GO_NEGATIVE_REGULATION_OF_INNATE_IMMUNE_RESPONSE	0.000898177	wholeblood
6.68314e-05	GO_NEGATIVE_REGULATION_OF_B_CELL_PROLIFERATION	0.000915276	wholeblood
6.68506e-05	GO_PROTEIN_PHOSPHORYLATION	0.000915276	wholeblood
2.90203e-05	GO_FATTY_ACID_CATABOLIC_PROCESS	0.000926145	muscleskeletal
6.84543e-05	GO_POSITIVE_REGULATION_OF_INTERLEUKIN_12_PRODUCTION	0.000934348	wholeblood
6.87757e-05	GO_RESPONSE_TO_TUMOR_NECROSIS_FACTOR	0.000935855	wholeblood
9.70526e-06	GO_REGULATION_OF_MICROTUBULE_POLYMERIZATION_OR_DEPOLYMERIZATION	0.000935924	esophagusmucosa
2.98017e-05	GO_MUSCLE_TISSUE_DEVELOPMENT	0.000939151	muscleskeletal
2.98513e-05	GO_REGULATION_OF_SYSTEM_PROCESS	0.000939151	muscleskeletal
6.98836e-05	GO_MULTI_ORGANISM_MEMBRANE_ORGANIZATION	0.000948023	wholeblood
1.01577e-05	GO_CYTOSKELETON_ORGANIZATION	0.000958712	esophagusmucosa
1.20346e-05	GO_RESPONSE_TO_NITROGEN_COMPOUND	0.000970642	adiposesubcutaneous
1.91069e-05	GO_CARDIAC_MUSCLE_TISSUE_DEVELOPMENT	0.000974232	arterytibial
1.35095e-05	GO_TRNA_MODIFICATION	0.000982428	skins
3.3982e-06	GO_ESTABLISHMENT_OR_MAINTENANCE_OF_CELL_POLARITY	0.00100496	skinnotsunexposedsuprapubic
7.46702e-05	GO_REGULATION_OF_INTERLEUKIN_1_BETA_PRODUCTION	0.00100987	wholeblood
4.30167e-06	GO_BLOOD_VESSEL_MORPHOGENESIS	0.00104459	lung
4.63012e-06	GO_METAL_ION_TRANSPORT	0.00104459	lung
4.7096e-06	GO_ANGIOGENESIS	0.00104459	lung
7.84564e-05	GO_REGULATION_OF_PROTEIN_POLYMERIZATION	0.00105785	wholeblood
7.88909e-05	GO_CHROMATIN_ASSEMBLY_OR_DISASSEMBLY	0.00106049	wholeblood
5.36218e-06	GO_REGIONALIZATION	0.00108121	skinsunexposedlowerleg
2.19361e-05	GO_CALCIUM_DEPENDENT_CELL_CELL_ADHESION_VIA_PLASMA_MEMBRANE_CELL_ADHESION_MOLECULES	0.00110578	arterytibial
3.65621e-05	GO_POSITIVE_REGULATION_OF_WNT_SIGNALING_PATHWAY	0.00114218	muscleskeletal
8.57585e-05	GO_TAXIS	0.00114932	wholeblood
8.61068e-05	GO_POSITIVE_REGULATION_OF_PROTEOLYSIS	0.00115051	wholeblood
3.75964e-05	GO_MEMBRANE_BUDDING	0.00116628	muscleskeletal
3.89808e-05	GO_ACTOMYOSIN_STRUCTURE_ORGANIZATION	0.00120082	muscleskeletal
9.03365e-05	GO_MYELOID_LEUKOCYTE_MIGRATION	0.00120243	wholeblood
9.08059e-05	GO_GAS_TRANSPORT	0.00120243	wholeblood
9.08059e-05	GO_POSITIVE_REGULATION_OF_NATURAL_KILLER_CELL_MEDIATED_IMMUNITY	0.00120243	wholeblood
5.72379e-06	GO_REGULATION_OF_CELLULAR_COMPONENT_MOVEMENT	0.00120908	lung
9.30404e-05	GO_PEPTIDYL_TYROSINE_AUTOPHOSPHORYLATION	0.00122835	wholeblood
1.59616e-05	GO_POSITIVE_REGULATION_OF_FATTY_ACID_METABOLIC_PROCESS	0.00126439	adiposesubcutaneous
4.26164e-05	GO_MUSCLE_ORGAN_MORPHOGENESIS	0.00130377	muscleskeletal
1.82888e-05	GO_RNA_MODIFICATION	0.00130853	skins
1.88724e-05	GO_GOLGI_VESICLE_TRANSPORT	0.00132885	skins
1.70994e-05	GO_SYSTEM_PROCESS	0.00133076	adiposesubcutaneous
1.77526e-05	GO_REGULATION_OF_EPITHELIAL_CELL_PROLIFERATION	0.0013359	adiposesubcutaneous
1.77679e-05	GO_EMBRYONIC_SKELETAL_SYSTEM_MORPHOGENESIS	0.0013359	adiposesubcutaneous
4.39992e-05	GO_MUSCLE_ADAPTATION	0.00133685	muscleskeletal
6.99863e-06	GO_LIPID_BIOSYNTHETIC_PROCESS	0.00133784	skinsunexposedlowerleg
7.3532e-06	GO_SPHINGOLIPID_METABOLIC_PROCESS	0.00133784	skinsunexposedlowerleg
7.53969e-06	GO_SKIN_EPIDERMIS_DEVELOPMENT	0.00133784	skinsunexposedlowerleg
1.47778e-05	GO_NEGATIVE_REGULATION_OF_CELL_DIVISION	0.00136572	esophagusmucosa
1.89062e-05	GO_LIPID_CATABOLIC_PROCESS	0.00136667	adiposesubcutaneous
1.89947e-05	GO_TRIGLYCERIDE_CATABOLIC_PROCESS	0.00136667	adiposesubcutaneous
1.92192e-05	GO_MESENCHYMAL_CELL_DIFFERENTIATION	0.00136667	adiposesubcutaneous
1.94515e-05	GO_OXIDATION_REDUCTION_PROCESS	0.00136667	adiposesubcutaneous
2.00466e-05	GO_NEURON_DEVELOPMENT	0.00136667	adiposesubcutaneous
2.005e-05	GO_NEUTRAL_LIPID_METABOLIC_PROCESS	0.00136667	adiposesubcutaneous
2.03336e-05	GO_FATTY_ACID_CATABOLIC_PROCESS	0.00136667	adiposesubcutaneous
1.50981e-05	GO_MITOTIC_CELL_CYCLE_CHECKPOINT	0.00136684	esophagusmucosa
2.08306e-05	GO_REGULATION_OF_LIPID_CATABOLIC_PROCESS	0.00137917	adiposesubcutaneous
1.55878e-05	GO_KINETOCHORE_ORGANIZATION	0.00138295	esophagusmucosa
4.64325e-05	GO_REGULATION_OF_ESTABLISHMENT_OF_PLANAR_POLARITY	0.00140119	muscleskeletal
0.000107077	GO_B_CELL_PROLIFERATION	0.00140531	wholeblood
0.000107077	GO_REGULATION_OF_T_HELPER_1_TYPE_IMMUNE_RESPONSE	0.00140531	wholeblood
4.73495e-05	GO_PROTEIN_UBIQUITINATION_INVOLVED_IN_UBIQUITIN_DEPENDENT_PROTEIN_CATABOLIC_PROCESS	0.00141921	muscleskeletal
8.33534e-06	GO_ESTABLISHMENT_OF_EPITHELIAL_CELL_POLARITY	0.00142214	skinsunexposedlowerleg
2.18283e-05	GO_RESPONSE_TO_HORMONE	0.00142397	adiposesubcutaneous
0.000109438	GO_CARBOHYDRATE_DERIVATIVE_CATABOLIC_PROCESS	0.00143206	wholeblood
0.000111151	GO_POSITIVE_REGULATION_OF_APOPTOTIC_SIGNALING_PATHWAY	0.00145019	wholeblood
2.29552e-05	GO_UROGENITAL_SYSTEM_DEVELOPMENT	0.00147579	adiposesubcutaneous
0.000115441	GO_POSITIVE_REGULATION_OF_INTERLEUKIN_1_BETA_PRODUCTION	0.0014833	wholeblood
0.000115441	GO_REGULATION_OF_T_CELL_APOPTOTIC_PROCESS	0.0014833	wholeblood
0.000115441	GO_POSITIVE_REGULATION_OF_INTERFERON_BETA_PRODUCTION	0.0014833	wholeblood
0.000115441	GO_MACROPHAGE_ACTIVATION	0.0014833	wholeblood
0.000115695	GO_REGULATION_OF_T_HELPER_CELL_DIFFERENTIATION	0.0014833	wholeblood
0.000115695	GO_REGULATION_OF_T_CELL_MIGRATION	0.0014833	wholeblood
5.21134e-05	GO_PROTEIN_LOCALIZATION_TO_ORGANELLE	0.00155151	muscleskeletal
2.47992e-05	GO_ADENYLATE_CYCLASE_ACTIVATING_G_PROTEIN_COUPLED_RECEPTOR_SIGNALING_PATHWAY	0.00157156	adiposesubcutaneous
0.00012463	GO_LYMPHOCYTE_COSTIMULATION	0.00159325	wholeblood
3.20694e-05	GO_NEGATIVE_REGULATION_OF_CARTILAGE_DEVELOPMENT	0.00159843	arterytibial
7.95284e-06	GO_POSITIVE_REGULATION_OF_HYDROLASE_ACTIVITY	0.00160358	lung
2.58121e-05	GO_CELLULAR_RESPONSE_TO_ENDOGENOUS_STIMULUS	0.00161271	adiposesubcutaneous
0.000128211	GO_POSITIVE_REGULATION_OF_PROTEIN_SERINE_THREONINE_KINASE_ACTIVITY	0.00163432	wholeblood
2.66537e-05	GO_ENZYME_LINKED_RECEPTOR_PROTEIN_SIGNALING_PATHWAY	0.00164217	adiposesubcutaneous
8.54491e-06	GO_POSITIVE_REGULATION_OF_DEVELOPMENTAL_PROCESS	0.00164805	lung
0.000129741	GO_ESTABLISHMENT_OF_LOCALIZATION_IN_CELL	0.00164908	wholeblood
0.000132144	GO_CELLULAR_RESPONSE_TO_OXYGEN_CONTAINING_COMPOUND	0.00167483	wholeblood
0.000135339	GO_REGULATION_OF_TRANSFERASE_ACTIVITY	0.00171044	wholeblood
2.82982e-05	GO_REGULATION_OF_VASCULATURE_DEVELOPMENT	0.0017196	adiposesubcutaneous
0.000136623	GO_REGULATION_OF_CELLULAR_COMPONENT_BIOGENESIS	0.00172177	wholeblood
0.000139478	GO_IMMUNOGLOBULIN_PRODUCTION	0.00174049	wholeblood
0.000139478	GO_NEGATIVE_REGULATION_OF_TUMOR_NECROSIS_FACTOR_SUPERFAMILY_CYTOKINE_PRODUCTION	0.00174049	wholeblood
0.000139519	GO_ORGANELLE_FUSION	0.00174049	wholeblood
0.000139679	GO_POSITIVE_REGULATION_OF_PHOSPHORUS_METABOLIC_PROCESS	0.00174049	wholeblood
0.000141061	GO_MEMBRANE_FUSION	0.00175279	wholeblood
2.05528e-05	GO_NEGATIVE_REGULATION_OF_CELL_CYCLE_PHASE_TRANSITION	0.00178769	esophagusmucosa
0.000145449	GO_POSITIVE_REGULATION_OF_TRANSFERASE_ACTIVITY	0.00180227	wholeblood
6.53498e-06	GO_ESTABLISHMENT_OF_CELL_POLARITY	0.00181182	skinnotsunexposedsuprapubic
0.000147981	GO_DENDRITIC_CELL_CHEMOTAXIS	0.00182853	wholeblood
6.23882e-05	GO_REGULATION_OF_SODIUM_ION_TRANSMEMBRANE_TRANSPORT	0.00183281	muscleskeletal
6.23882e-05	GO_PROTEIN_TARGETING_TO_MITOCHONDRION	0.00183281	muscleskeletal
6.34238e-05	GO_SINGLE_ORGANISM_MEMBRANE_BUDDING	0.00184793	muscleskeletal
6.3736e-05	GO_ORGANIC_ACID_CATABOLIC_PROCESS	0.00184793	muscleskeletal
0.000155786	GO_REGULATION_OF_APOPTOTIC_SIGNALING_PATHWAY	0.00191733	wholeblood
0.000156031	GO_REGULATION_OF_T_CELL_MEDIATED_IMMUNITY	0.00191733	wholeblood
1.03986e-05	GO_ION_TRANSPORT	0.001922	lung
6.762e-05	GO_REGULATION_OF_MITOTIC_CELL_CYCLE	0.00194781	muscleskeletal
0.000160482	GO_ZYMOGEN_ACTIVATION	0.00196657	wholeblood
3.30059e-05	GO_REGULATION_OF_BLOOD_PRESSURE	0.00196785	adiposesubcutaneous
3.32707e-05	GO_LIPID_OXIDATION	0.00196785	adiposesubcutaneous
0.000163842	GO_POSITIVE_REGULATION_OF_MAPK_CASCADE	0.00200222	wholeblood
3.44235e-05	GO_REGULATION_OF_CELLULAR_COMPONENT_MOVEMENT	0.00200925	adiposesubcutaneous
1.13691e-05	GO_REGULATION_OF_VASOCONSTRICTION	0.00201733	lung
7.19192e-05	GO_REGULATION_OF_CELLULAR_AMIDE_METABOLIC_PROCESS	0.00205828	muscleskeletal
0.000170869	GO_REGULATION_OF_MAPK_CASCADE	0.00207288	wholeblood
0.000171027	GO_ACTIN_POLYMERIZATION_OR_DEPOLYMERIZATION	0.00207288	wholeblood
0.000171027	GO_DEFENSE_RESPONSE_TO_FUNGUS	0.00207288	wholeblood
3.01948e-05	GO_PROTEIN_SUMOYLATION	0.00209288	skins
0.000173833	GO_RECEPTOR_MEDIATED_ENDOCYTOSIS	0.00210116	wholeblood
3.66012e-05	GO_POSITIVE_REGULATION_OF_DEVELOPMENTAL_PROCESS	0.00210861	adiposesubcutaneous
0.000175634	GO_ACTIVATION_OF_CYSTEINE_TYPE_ENDOPEPTIDASE_ACTIVITY	0.00211715	wholeblood
2.4922e-05	GO_REGULATION_OF_TRANSCRIPTION_INVOLVED_IN_G1_S_TRANSITION_OF_MITOTIC_CELL_CYCLE	0.00212604	esophagusmucosa
3.13951e-05	GO_MITOCHONDRIAL_TRANSLATION	0.0021426	skins
0.000178847	GO_POSITIVE_REGULATION_OF_TOLL_LIKE_RECEPTOR_SIGNALING_PATHWAY	0.00215004	wholeblood
0.000179491	GO_REGULATION_OF_IMMUNOGLOBULIN_PRODUCTION	0.00215186	wholeblood
0.000179969	GO_HOMEOSTATIC_PROCESS	0.00215186	wholeblood
7.61152e-05	GO_REGULATION_OF_CELL_CYCLE_PROCESS	0.00216163	muscleskeletal
7.65048e-05	GO_TETRAPYRROLE_BIOSYNTHETIC_PROCESS	0.00216163	muscleskeletal
3.8272e-05	GO_NEUTRAL_LIPID_CATABOLIC_PROCESS	0.0021766	adiposesubcutaneous
0.000182567	GO_POSITIVE_REGULATION_OF_CELLULAR_COMPONENT_ORGANIZATION	0.00217706	wholeblood
2.61792e-05	GO_O_GLYCAN_PROCESSING	0.00219115	esophagusmucosa
3.26134e-05	GO_CELL_CYCLE	0.00219201	skins
1.34158e-05	GO_SENSORY_ORGAN_MORPHOGENESIS	0.00220417	skinsunexposedlowerleg
2.71319e-05	GO_DNA_PACKAGING	0.00222883	esophagusmucosa
0.000188805	GO_REGULATION_OF_DNA_RECOMBINATION	0.00223941	wholeblood
0.000188805	GO_POSITIVE_REGULATION_OF_TRANSCRIPTION_FACTOR_IMPORT_INTO_NUCLEUS	0.00223941	wholeblood
0.000191574	GO_CHROMATIN_MODIFICATION	0.00226619	wholeblood
4.08426e-05	GO_REGULATION_OF_SYSTEMIC_ARTERIAL_BLOOD_PRESSURE_MEDIATED_BY_A_CHEMICAL_SIGNAL	0.00229339	adiposesubcutaneous
0.000195039	GO_POSITIVE_REGULATION_OF_IMMUNOGLOBULIN_PRODUCTION	0.00230104	wholeblood
0.000199463	GO_POSITIVE_REGULATION_OF_LEUKOCYTE_APOPTOTIC_PROCESS	0.00234078	wholeblood
0.000199463	GO_DETECTION_OF_BIOTIC_STIMULUS	0.00234078	wholeblood
4.22688e-05	GO_POSITIVE_REGULATION_OF_LOCOMOTION	0.0023438	adiposesubcutaneous
3.56216e-05	GO_TRANSLATIONAL_TERMINATION	0.00235847	skins
4.31073e-05	GO_MONOCARBOXYLIC_ACID_CATABOLIC_PROCESS	0.00236079	adiposesubcutaneous
4.80729e-05	GO_NEPHRON_DEVELOPMENT	0.00236946	arterytibial
8.47775e-05	GO_FC_RECEPTOR_SIGNALING_PATHWAY	0.00238021	muscleskeletal
4.8835e-05	GO_SECOND_MESSENGER_MEDIATED_SIGNALING	0.00238057	arterytibial
9.9124e-06	GO_NEURON_DIFFERENTIATION	0.00238384	skinnotsunexposedsuprapubic
9.99806e-06	GO_REGIONALIZATION	0.00238384	skinnotsunexposedsuprapubic
1.02103e-05	GO_ESTABLISHMENT_OF_EPITHELIAL_CELL_POLARITY	0.00238384	skinnotsunexposedsuprapubic
4.41682e-05	GO_REGULATION_OF_EPITHELIAL_CELL_MIGRATION	0.00238939	adiposesubcutaneous
1.40121e-05	GO_POSITIVE_REGULATION_OF_MAPK_CASCADE	0.00239069	lung
0.000205929	GO_POSITIVE_REGULATION_OF_PROTEIN_COMPLEX_ASSEMBLY	0.00241029	wholeblood
1.80218e-05	GO_BEHAVIOR	0.00242257	nervetibial
3.75457e-05	GO_DNA_BIOSYNTHETIC_PROCESS	0.00244931	skins
5.11513e-05	GO_MOVEMENT_OF_CELL_OR_SUBCELLULAR_COMPONENT	0.00246369	arterytibial
5.16509e-05	GO_REGULATION_OF_TRANSPORT	0.00246369	arterytibial
1.51193e-05	GO_CIRCULATORY_SYSTEM_PROCESS	0.00248404	lung
4.65167e-05	GO_HEART_DEVELOPMENT	0.00248612	adiposesubcutaneous
5.28113e-05	GO_REGULATION_OF_CELL_MORPHOGENESIS_INVOLVED_IN_DIFFERENTIATION	0.00249224	arterytibial
1.12515e-05	GO_SPHINGOLIPID_METABOLIC_PROCESS	0.00249559	skinnotsunexposedsuprapubic
3.89025e-05	GO_CHROMATIN_MODIFICATION	0.00249815	skins
3.95946e-05	GO_SINGLE_ORGANISM_CELLULAR_LOCALIZATION	0.00249815	skins
3.99839e-05	GO_MEMBRANE_ORGANIZATION	0.00249815	skins
9.0166e-05	GO_REGULATION_OF_SKELETAL_MUSCLE_TISSUE_DEVELOPMENT	0.00251558	muscleskeletal
5.41591e-05	GO_NEGATIVE_REGULATION_OF_TRANSFORMING_GROWTH_FACTOR_BETA_RECEPTOR_SIGNALING_PATHWAY	0.00252895	arterytibial
9.21062e-05	GO_TRANSCRIPTION_INITIATION_FROM_RNA_POLYMERASE_II_PROMOTER	0.00255364	muscleskeletal
4.84992e-05	GO_REGULATION_OF_PEPTIDYL_SERINE_PHOSPHORYLATION	0.00256122	adiposesubcutaneous
4.18272e-05	GO_RNA_LOCALIZATION	0.00257702	skins
1.69317e-05	GO_LIPID_METABOLIC_PROCESS	0.00268246	skinsunexposedlowerleg
0.000232213	GO_SOMATIC_DIVERSIFICATION_OF_IMMUNE_RECEPTORS	0.00271078	wholeblood
0.000234184	GO_NEGATIVE_REGULATION_OF_NITROGEN_COMPOUND_METABOLIC_PROCESS	0.00272662	wholeblood
0.00023524	GO_NEGATIVE_REGULATION_OF_LEUKOCYTE_PROLIFERATION	0.00273174	wholeblood
0.000239127	GO_POSITIVE_REGULATION_OF_TYPE_2_IMMUNE_RESPONSE	0.00275523	wholeblood
0.000239127	GO_OXYGEN_TRANSPORT	0.00275523	wholeblood
0.000239127	GO_T_CELL_MIGRATION	0.00275523	wholeblood
0.000240525	GO_CELLULAR_HOMEOSTASIS	0.00276417	wholeblood
1.75208e-05	GO_SULFATION	0.00277579	lung
0.00010093	GO_SINGLE_ORGANISM_CELLULAR_LOCALIZATION	0.00278089	muscleskeletal
1.83212e-05	GO_VASCULATURE_DEVELOPMENT	0.00280252	lung
5.44619e-05	GO_POSITIVE_REGULATION_OF_ENDOTHELIAL_CELL_PROLIFERATION	0.00284227	adiposesubcutaneous
2.18111e-05	GO_CENTRAL_NERVOUS_SYSTEM_DEVELOPMENT	0.00284571	nervetibial
0.000249869	GO_NEGATIVE_REGULATION_OF_CELL_CELL_ADHESION	0.00286413	wholeblood
0.00010751	GO_INORGANIC_ION_TRANSMEMBRANE_TRANSPORT	0.00291022	muscleskeletal
0.000107608	GO_AMINO_ACID_ACTIVATION	0.00291022	muscleskeletal
0.000107608	GO_ASPARTATE_FAMILY_AMINO_ACID_METABOLIC_PROCESS	0.00291022	muscleskeletal
0.000108248	GO_OXIDOREDUCTION_COENZYME_METABOLIC_PROCESS	0.00291022	muscleskeletal
0.000109116	GO_REGULATION_OF_BLOOD_CIRCULATION	0.00291591	muscleskeletal
0.000255131	GO_NEGATIVE_REGULATION_OF_GENE_EXPRESSION	0.00291691	wholeblood
0.000111454	GO_CELLULAR_MACROMOLECULE_LOCALIZATION	0.00296054	muscleskeletal
0.00025963	GO_REGULATION_OF_PROTEOLYSIS	0.00296071	wholeblood
0.00026085	GO_CELL_KILLING	0.00296701	wholeblood
5.78405e-05	GO_ENDOCARDIAL_CUSHION_MORPHOGENESIS	0.00298349	adiposesubcutaneous
6.569e-05	GO_REGULATION_OF_ACTIN_FILAMENT_BASED_PROCESS	0.00300974	arterytibial
6.58126e-05	GO_CELLULAR_RESPONSE_TO_ENDOGENOUS_STIMULUS	0.00300974	arterytibial
0.000114831	GO_SKELETAL_MUSCLE_ADAPTATION	0.0030321	muscleskeletal
1.44356e-05	GO_ORGAN_MORPHOGENESIS	0.00304935	skinnotsunexposedsuprapubic
5.0567e-05	GO_NUCLEOTIDE_EXCISION_REPAIR	0.00307281	skins
2.09941e-05	GO_REGULATION_OF_GTPASE_ACTIVITY	0.00310433	lung
6.88291e-05	GO_ARTERY_DEVELOPMENT	0.00311557	arterytibial
2.23842e-05	GO_REGULATION_OF_CELL_DIFFERENTIATION	0.00315935	lung
2.27906e-05	GO_CATION_TRANSPORT	0.00315935	lung
7.08167e-05	GO_GLOMERULUS_DEVELOPMENT	0.00317316	arterytibial
0.000280549	GO_PROTEOLYSIS	0.00318291	wholeblood
4.01709e-05	GO_MEIOTIC_CELL_CYCLE	0.00323996	esophagusmucosa
0.000286503	GO_REGULATION_OF_INTRACELLULAR_TRANSPORT	0.00324216	wholeblood
4.09588e-05	GO_LIPID_METABOLIC_PROCESS	0.00324452	esophagusmucosa
0.000295967	GO_NEGATIVE_REGULATION_OF_LEUKOCYTE_APOPTOTIC_PROCESS	0.00334074	wholeblood
0.000298527	GO_REGULATION_OF_TUMOR_NECROSIS_FACTOR_BIOSYNTHETIC_PROCESS	0.00335258	wholeblood
0.000298527	GO_MATURE_B_CELL_DIFFERENTIATION	0.00335258	wholeblood
5.59378e-05	GO_MITOTIC_CELL_CYCLE	0.00335324	skins
2.65171e-05	GO_POSITIVE_REGULATION_OF_SYNAPSE_ASSEMBLY	0.00336086	nervetibial
0.000301595	GO_NEGATIVE_REGULATION_OF_HEMOPOIESIS	0.00337848	wholeblood
2.75514e-05	GO_LOCOMOTORY_BEHAVIOR	0.00339494	nervetibial
6.68136e-05	GO_NEURON_DIFFERENTIATION	0.00340673	adiposesubcutaneous
0.000307169	GO_PROTEIN_AUTOPHOSPHORYLATION	0.00343225	wholeblood
4.4217e-05	GO_CELL_PROLIFERATION	0.00344117	esophagusmucosa
0.00013329	GO_REGULATION_OF_RELEASE_OF_SEQUESTERED_CALCIUM_ION_INTO_CYTOSOL_BY_SARCOPLASMIC_RETICULUM	0.00345872	muscleskeletal
0.000133327	GO_POSITIVE_REGULATION_OF_NUCLEOSIDE_METABOLIC_PROCESS	0.00345872	muscleskeletal
0.000133327	GO_REGULATION_OF_CELLULAR_RESPIRATION	0.00345872	muscleskeletal
6.86709e-05	GO_ANATOMICAL_STRUCTURE_FORMATION_INVOLVED_IN_MORPHOGENESIS	0.00346164	adiposesubcutaneous
7.84749e-05	GO_ARTERY_MORPHOGENESIS	0.0034655	arterytibial
7.89035e-05	GO_REGULATION_OF_BLOOD_CIRCULATION	0.0034655	arterytibial
0.00031185	GO_RESPONSE_TO_EXOGENOUS_DSRNA	0.00347021	wholeblood
0.000312131	GO_REGULATION_OF_MYELOID_CELL_DIFFERENTIATION	0.00347021	wholeblood
0.000313262	GO_COVALENT_CHROMATIN_MODIFICATION	0.00347408	wholeblood
8.0753e-05	GO_OSSIFICATION	0.00351196	arterytibial
0.000329707	GO_REGULATION_OF_INTERLEUKIN_17_PRODUCTION	0.00364394	wholeblood
0.000330222	GO_POSITIVE_REGULATION_OF_RELEASE_OF_CYTOCHROME_C_FROM_MITOCHONDRIA	0.00364394	wholeblood
8.4942e-05	GO_NEGATIVE_REGULATION_OF_TRANSPORT	0.00365828	arterytibial
0.000335167	GO_REGULATION_OF_LEUKOCYTE_CHEMOTAXIS	0.00368934	wholeblood
0.000338089	GO_MULTI_ORGANISM_ORGANELLE_ORGANIZATION	0.00370312	wholeblood
0.000338089	GO_EPITHELIAL_CELL_APOPTOTIC_PROCESS	0.00370312	wholeblood
0.000339756	GO_AUTOPHAGOSOME_ORGANIZATION	0.00371221	wholeblood
0.000145213	GO_CELLULAR_RESPONSE_TO_STRESS	0.00374515	muscleskeletal
0.000147318	GO_REGULATION_OF_CELL_CYCLE_PHASE_TRANSITION	0.00376471	muscleskeletal
0.000147669	GO_SINGLE_ORGANISM_CATABOLIC_PROCESS	0.00376471	muscleskeletal
0.000345765	GO_POSITIVE_REGULATION_OF_MULTI_ORGANISM_PROCESS	0.00376858	wholeblood
0.000148957	GO_REGULATION_OF_PROTEASOMAL_PROTEIN_CATABOLIC_PROCESS	0.00377584	muscleskeletal
0.000349666	GO_CELL_MOTILITY	0.00380176	wholeblood
4.97334e-05	GO_TISSUE_DEVELOPMENT	0.00380375	esophagusmucosa
6.43855e-05	GO_NUCLEAR_TRANSCRIBED_MRNA_CATABOLIC_PROCESS_EXONUCLEOLYTIC	0.00380819	skins
0.000151937	GO_ESTABLISHMENT_OF_PROTEIN_LOCALIZATION	0.00382951	muscleskeletal
3.20114e-05	GO_TELENCEPHALON_DEVELOPMENT	0.00383119	nervetibial
3.2819e-05	GO_FOREBRAIN_DEVELOPMENT	0.00383119	nervetibial
0.000154032	GO_POSITIVE_REGULATION_OF_PROTEOLYSIS	0.00386038	muscleskeletal
9.10144e-05	GO_TISSUE_MORPHOGENESIS	0.00388211	arterytibial
0.000359734	GO_REGULATION_OF_TUMOR_NECROSIS_FACTOR_MEDIATED_SIGNALING_PATHWAY	0.00389214	wholeblood
0.000359734	GO_REGULATION_OF_INTERLEUKIN_2_PRODUCTION	0.00389214	wholeblood
0.000363	GO_NUCLEUS_ORGANIZATION	0.00391793	wholeblood
0.000157297	GO_PURINE_NUCLEOSIDE_BIOSYNTHETIC_PROCESS	0.00392004	muscleskeletal
0.000159587	GO_REGULATION_OF_CATION_TRANSMEMBRANE_TRANSPORT	0.0039549	muscleskeletal
1.96921e-05	GO_MOLTING_CYCLE	0.00397064	skinnotsunexposedsuprapubic
2.60563e-05	GO_CELL_FATE_COMMITMENT	0.00398572	skinsunexposedlowerleg
0.000163996	GO_PROTEIN_K63_LINKED_UBIQUITINATION	0.00403466	muscleskeletal
0.000164912	GO_REGULATION_OF_CELL_CYCLE	0.00403466	muscleskeletal
0.000165534	GO_ACETYL_COA_BIOSYNTHETIC_PROCESS	0.00403466	muscleskeletal
0.000374924	GO_REGULATION_OF_ERBB_SIGNALING_PATHWAY	0.0040368	wholeblood
0.000166569	GO_REGULATION_OF_CALCIUM_ION_TRANSMEMBRANE_TRANSPORTER_ACTIVITY	0.00403771	muscleskeletal
5.3757e-05	GO_REGULATION_OF_SISTER_CHROMATID_SEGREGATION	0.0040418	esophagusmucosa
0.000167958	GO_VACUOLAR_TRANSPORT	0.00404925	muscleskeletal
0.000381219	GO_NEGATIVE_REGULATION_OF_NATURAL_KILLER_CELL_MEDIATED_IMMUNITY	0.00407491	wholeblood
0.000381219	GO_EXIT_FROM_MITOSIS	0.00407491	wholeblood
0.000381219	GO_PRODUCTION_OF_MOLECULAR_MEDIATOR_INVOLVED_IN_INFLAMMATORY_RESPONSE	0.00407491	wholeblood
6.99484e-05	GO_CELLULAR_MACROMOLECULAR_COMPLEX_ASSEMBLY	0.00408278	skins
9.70257e-05	GO_CELL_CELL_ADHESION_VIA_PLASMA_MEMBRANE_ADHESION_MOLECULES	0.00409911	arterytibial
0.000384631	GO_PHOSPHATE_CONTAINING_COMPOUND_METABOLIC_PROCESS	0.0041015	wholeblood
0.00038675	GO_POSITIVE_REGULATION_OF_ALPHA_BETA_T_CELL_DIFFERENTIATION	0.0041142	wholeblood
3.08315e-05	GO_MESENCHYME_DEVELOPMENT	0.00414451	lung
5.60921e-05	GO_CELL_JUNCTION_ASSEMBLY	0.00414708	esophagusmucosa
0.000393344	GO_CELLULAR_CHEMICAL_HOMEOSTASIS	0.00417434	wholeblood
8.46865e-05	GO_FAT_CELL_DIFFERENTIATION	0.00420024	adiposesubcutaneous
8.52168e-05	GO_SINGLE_ORGANISM_CATABOLIC_PROCESS	0.00420024	adiposesubcutaneous
8.69107e-05	GO_AMEBOIDAL_TYPE_CELL_MIGRATION	0.00422568	adiposesubcutaneous
8.83735e-05	GO_CYCLIC_NUCLEOTIDE_METABOLIC_PROCESS	0.00422568	adiposesubcutaneous
8.85907e-05	GO_CELLULAR_RESPONSE_TO_ACID_CHEMICAL	0.00422568	adiposesubcutaneous
0.000177475	GO_TRANSCRIPTION_ELONGATION_FROM_RNA_POLYMERASE_II_PROMOTER	0.00425557	muscleskeletal
0.000179651	GO_CATION_TRANSPORT	0.00428459	muscleskeletal
9.08281e-05	GO_REGULATION_OF_MULTICELLULAR_ORGANISMAL_DEVELOPMENT	0.00428631	adiposesubcutaneous
7.49878e-05	GO_DNA_REPLICATION	0.00429825	skins
7.55779e-05	GO_MATURATION_OF_5_8S_RRNA	0.00429825	skins
3.85604e-05	GO_SINGLE_ORGANISM_BEHAVIOR	0.00434999	nervetibial
3.95118e-05	GO_POSITIVE_REGULATION_OF_NEURON_DIFFERENTIATION	0.00434999	nervetibial
4.02051e-05	GO_PERIPHERAL_NERVOUS_SYSTEM_AXON_ENSHEATHMENT	0.00434999	nervetibial
0.000103982	GO_KIDNEY_EPITHELIUM_DEVELOPMENT	0.00435157	arterytibial
9.43476e-05	GO_NEUTRAL_LIPID_BIOSYNTHETIC_PROCESS	0.00435964	adiposesubcutaneous
9.43476e-05	GO_SUBSTRATE_DEPENDENT_CELL_MIGRATION	0.00435964	adiposesubcutaneous
0.000415474	GO_ANTIGEN_PROCESSING_AND_PRESENTATION_OF_PEPTIDE_ANTIGEN	0.00439867	wholeblood
0.000186701	GO_POSITIVE_REGULATION_OF_AUTOPHAGY	0.0044289	muscleskeletal
0.000421512	GO_RESPONSE_TO_DSRNA	0.00445197	wholeblood
6.15197e-05	GO_MITOTIC_RECOMBINATION	0.00447379	esophagusmucosa
0.000425558	GO_NEGATIVE_REGULATION_OF_PROTEIN_METABOLIC_PROCESS	0.00448402	wholeblood
4.24884e-05	GO_REGULATION_OF_CELL_PROJECTION_ORGANIZATION	0.00448758	nervetibial
0.000108403	GO_REGULATION_OF_NEUROTRANSMITTER_TRANSPORT	0.00449416	arterytibial
0.000429183	GO_REGULATION_OF_CELLULAR_PH	0.00451151	wholeblood
3.05676e-05	GO_REGULATION_OF_CELL_PROJECTION_ORGANIZATION	0.00451992	skinsunexposedlowerleg
9.8908e-05	GO_G_PROTEIN_COUPLED_RECEPTOR_SIGNALING_PATHWAY_COUPLED_TO_CYCLIC_NUCLEOTIDE_SECOND_MESSENGER	0.00452326	adiposesubcutaneous
0.000435545	GO_NEGATIVE_REGULATION_OF_ADAPTIVE_IMMUNE_RESPONSE	0.00454606	wholeblood
0.000435545	GO_NEGATIVE_REGULATION_OF_LYMPHOCYTE_MEDIATED_IMMUNITY	0.00454606	wholeblood
0.000435545	GO_NEGATIVE_REGULATION_OF_EXTRINSIC_APOPTOTIC_SIGNALING_PATHWAY_VIA_DEATH_DOMAIN_RECEPTORS	0.00454606	wholeblood
0.000195281	GO_CELLULAR_AMINO_ACID_METABOLIC_PROCESS	0.00459271	muscleskeletal
0.000195677	GO_REGULATION_OF_CELLULAR_RESPONSE_TO_STRESS	0.00459271	muscleskeletal
4.46088e-05	GO_REGULATION_OF_SYNAPTIC_PLASTICITY	0.00460196	nervetibial
0.000198743	GO_REGULATION_OF_RESPONSE_TO_EXTRACELLULAR_STIMULUS	0.00464013	muscleskeletal
0.000200262	GO_GOLGI_ORGANIZATION	0.00465111	muscleskeletal
2.43226e-05	GO_MULTICELLULAR_ORGANISMAL_WATER_HOMEOSTASIS	0.0046911	skinnotsunexposedsuprapubic
0.00020439	GO_INTRACELLULAR_PROTEIN_TRANSPORT	0.00472227	muscleskeletal
0.000207852	GO_MONOCARBOXYLIC_ACID_CATABOLIC_PROCESS	0.00477737	muscleskeletal
4.79461e-05	GO_MODULATION_OF_SYNAPTIC_TRANSMISSION	0.00483384	nervetibial
0.000466774	GO_CELLULAR_RESPONSE_TO_LIPID	0.00486058	wholeblood
6.82736e-05	GO_REGULATION_OF_SPINDLE_ORGANIZATION	0.00488486	esophagusmucosa
0.000473003	GO_POSITIVE_REGULATION_OF_PEPTIDASE_ACTIVITY	0.0049065	wholeblood
0.000473396	GO_PROTEIN_COMPLEX_SUBUNIT_ORGANIZATION	0.0049065	wholeblood
3.4342e-05	GO_NEURON_DEVELOPMENT	0.00491424	skinsunexposedlowerleg
3.76867e-05	GO_REGULATION_OF_ERK1_AND_ERK2_CASCADE	0.00491701	lung
8.81135e-05	GO_MITOCHONDRION_ORGANIZATION	0.00494774	skins
0.000483709	GO_NEGATIVE_REGULATION_OF_B_CELL_ACTIVATION	0.00499008	wholeblood
0.000483709	GO_MULTIVESICULAR_BODY_ORGANIZATION	0.00499008	wholeblood
0.000110622	GO_GLYCEROLIPID_CATABOLIC_PROCESS	0.00499088	adiposesubcutaneous
0.000111383	GO_RESPONSE_TO_PEPTIDE	0.00499088	adiposesubcutaneous
0.00011281	GO_G_PROTEIN_COUPLED_RECEPTOR_SIGNALING_PATHWAY	0.00500423	adiposesubcutaneous
0.000487787	GO_REGULATION_OF_VACUOLE_ORGANIZATION	0.00502048	wholeblood
0.000496163	GO_CELLULAR_RESPONSE_TO_STRESS	0.00505481	wholeblood
0.000497569	GO_ANTIGEN_PROCESSING_AND_PRESENTATION_VIA_MHC_CLASS_IB	0.00505481	wholeblood
0.000497569	GO_NEGATIVE_REGULATION_OF_INTERLEUKIN_12_PRODUCTION	0.00505481	wholeblood
0.000497569	GO_ARP2_3_COMPLEX_MEDIATED_ACTIN_NUCLEATION	0.00505481	wholeblood
0.000497569	GO_V_D_J_RECOMBINATION	0.00505481	wholeblood
0.00049796	GO_LYMPHOCYTE_MIGRATION	0.00505481	wholeblood
0.00022236	GO_REGULATION_OF_RYANODINE_SENSITIVE_CALCIUM_RELEASE_CHANNEL_ACTIVITY	0.00508448	muscleskeletal
0.000224618	GO_CARDIAC_MUSCLE_TISSUE_DEVELOPMENT	0.00510976	muscleskeletal
0.000229638	GO_PROTEIN_HOMOTETRAMERIZATION	0.00519731	muscleskeletal
0.000119724	GO_CELL_MIGRATION_INVOLVED_IN_SPROUTING_ANGIOGENESIS	0.00521248	adiposesubcutaneous
0.000119854	GO_TUBE_DEVELOPMENT	0.00521248	adiposesubcutaneous
0.000232956	GO_ANTIGEN_RECEPTOR_MEDIATED_SIGNALING_PATHWAY	0.00523204	muscleskeletal
0.000233531	GO_PROTEIN_IMPORT	0.00523204	muscleskeletal
7.53571e-05	GO_REGULATION_OF_PROTEIN_COMPLEX_DISASSEMBLY	0.0053061	esophagusmucosa
0.000527335	GO_ORGAN_OR_TISSUE_SPECIFIC_IMMUNE_RESPONSE	0.00534077	wholeblood
0.000239988	GO_VESICLE_TARGETING	0.00534968	muscleskeletal
0.00024238	GO_REGULATION_OF_MUSCLE_CELL_DIFFERENTIATION	0.00535145	muscleskeletal
0.00024248	GO_LOCALIZATION_WITHIN_MEMBRANE	0.00535145	muscleskeletal
0.000130832	GO_BONE_MORPHOGENESIS	0.0053738	arterytibial
4.31281e-05	GO_REGULATION_OF_EPITHELIAL_CELL_MIGRATION	0.00546618	lung
0.000134504	GO_NEGATIVE_REGULATION_OF_CELLULAR_RESPONSE_TO_GROWTH_FACTOR_STIMULUS	0.00547394	arterytibial
0.000127707	GO_BILE_ACID_METABOLIC_PROCESS	0.00547916	adiposesubcutaneous
0.000128456	GO_REGULATION_OF_ENDOTHELIAL_CELL_MIGRATION	0.00547916	adiposesubcutaneous
0.000543716	GO_POSITIVE_REGULATION_OF_CATABOLIC_PROCESS	0.00549413	wholeblood
0.000100771	GO_TELOMERE_MAINTENANCE_VIA_TELOMERE_LENGTHENING	0.00558774	skins
0.000558179	GO_REGULATION_OF_TOLERANCE_INDUCTION	0.00562513	wholeblood
0.000560484	GO_REGULATION_OF_LAMELLIPODIUM_ASSEMBLY	0.00562513	wholeblood
0.000560484	GO_MYELOID_DENDRITIC_CELL_ACTIVATION	0.00562513	wholeblood
8.24782e-05	GO_KERATINIZATION	0.00567323	esophagusmucosa
8.31289e-05	GO_INTERMEDIATE_FILAMENT_BASED_PROCESS	0.00567323	esophagusmucosa
0.000569807	GO_NEGATIVE_REGULATION_OF_CATALYTIC_ACTIVITY	0.00568957	wholeblood
0.000574185	GO_POSITIVE_REGULATION_OF_LEUKOCYTE_CHEMOTAXIS	0.00568957	wholeblood
0.0005746	GO_B_CELL_HOMEOSTASIS	0.00568957	wholeblood
0.0005746	GO_MAST_CELL_ACTIVATION	0.00568957	wholeblood
0.0005746	GO_NEGATIVE_REGULATION_OF_ALPHA_BETA_T_CELL_ACTIVATION	0.00568957	wholeblood
0.0005746	GO_NEUTROPHIL_MEDIATED_IMMUNITY	0.00568957	wholeblood
0.00025987	GO_NEGATIVE_REGULATION_OF_PROTEIN_COMPLEX_ASSEMBLY	0.00570686	muscleskeletal
8.58189e-05	GO_MITOTIC_SPINDLE_ORGANIZATION	0.00576807	esophagusmucosa
0.000264787	GO_NEGATIVE_REGULATION_OF_CANONICAL_WNT_SIGNALING_PATHWAY	0.00578619	muscleskeletal
0.000585958	GO_REGULATION_OF_GENE_EXPRESSION_EPIGENETIC	0.00578911	wholeblood
0.00013798	GO_CELLULAR_RESPONSE_TO_OXYGEN_CONTAINING_COMPOUND	0.00582933	adiposesubcutaneous
8.81798e-05	GO_CHROMOSOME_CONDENSATION	0.00583829	esophagusmucosa
0.000593919	GO_REGULATION_OF_INTERFERON_GAMMA_SECRETION	0.00585472	wholeblood
0.000597399	GO_GENE_SILENCING	0.00587597	wholeblood
0.000108307	GO_INTRACELLULAR_PROTEIN_TRANSPORT	0.00593149	skins
0.000275732	GO_PROTEIN_LOCALIZATION_TO_NUCLEUS	0.00599583	muscleskeletal
0.000144521	GO_AXONAL_FASCICULATION	0.00604805	adiposesubcutaneous
5.0934e-05	GO_POSITIVE_REGULATION_OF_ERK1_AND_ERK2_CASCADE	0.00607062	lung
5.19375e-05	GO_CIRCULATORY_SYSTEM_DEVELOPMENT	0.00607062	lung
5.20026e-05	GO_MORPHOGENESIS_OF_AN_EPITHELIUM	0.00607062	lung
0.000618648	GO_NEGATIVE_REGULATION_OF_PHOSPHORUS_METABOLIC_PROCESS	0.00607151	wholeblood
0.000148111	GO_REGULATION_OF_CYCLIC_NUCLEOTIDE_METABOLIC_PROCESS	0.00614039	adiposesubcutaneous
0.000284023	GO_LIPID_OXIDATION	0.00614599	muscleskeletal
0.000149707	GO_HEART_TRABECULA_MORPHOGENESIS	0.00614907	adiposesubcutaneous
0.000152569	GO_POSITIVE_REGULATION_OF_PHOSPHOPROTEIN_PHOSPHATASE_ACTIVITY	0.00615268	arterytibial
0.00015429	GO_REGULATION_OF_CELLULAR_LOCALIZATION	0.00616605	arterytibial
0.000151616	GO_VITAMIN_METABOLIC_PROCESS	0.00617037	adiposesubcutaneous
5.43512e-05	GO_NEGATIVE_REGULATION_OF_LOCOMOTION	0.0061821	lung
0.000114433	GO_CELL_CYCLE_PROCESS	0.00619057	skins
6.44616e-05	GO_REGULATION_OF_SYNAPSE_ASSEMBLY	0.00622776	nervetibial
6.45801e-05	GO_NEURON_RECOGNITION	0.00622776	nervetibial
0.000637341	GO_AUTOPHAGY	0.00624116	wholeblood
0.000644375	GO_POSITIVE_REGULATION_OF_B_CELL_PROLIFERATION	0.00626852	wholeblood
0.000644375	GO_REGULATION_OF_AUTOPHAGOSOME_ASSEMBLY	0.00626852	wholeblood
0.000644375	GO_B_CELL_ACTIVATION_INVOLVED_IN_IMMUNE_RESPONSE	0.00626852	wholeblood
0.000160173	GO_POSITIVE_REGULATION_OF_CELL_SUBSTRATE_ADHESION	0.00634262	arterytibial
0.000161568	GO_EMBRYONIC_ORGAN_DEVELOPMENT	0.00634262	arterytibial
0.000157566	GO_RESPONSE_TO_DRUG	0.00635419	adiposesubcutaneous
0.000159674	GO_NEGATIVE_REGULATION_OF_RESPONSE_TO_STIMULUS	0.00638121	adiposesubcutaneous
0.000296513	GO_ERAD_PATHWAY	0.0063851	muscleskeletal
0.00012039	GO_TRANSCRIPTION_FROM_RNA_POLYMERASE_III_PROMOTER	0.00643431	skins
4.64714e-05	GO_WATER_HOMEOSTASIS	0.00644209	skinsunexposedlowerleg
6.85824e-05	GO_CELL_CELL_ADHESION_VIA_PLASMA_MEMBRANE_ADHESION_MOLECULES	0.00647301	nervetibial
0.000168234	GO_HOMOPHILIC_CELL_ADHESION_VIA_PLASMA_MEMBRANE_ADHESION_MOLECULES	0.00654639	arterytibial
0.000679822	GO_POSITIVE_REGULATION_OF_CHEMOKINE_PRODUCTION	0.00659889	wholeblood
4.92476e-05	GO_PROXIMAL_DISTAL_PATTERN_FORMATION	0.00662007	skinsunexposedlowerleg
0.000172373	GO_CARDIOCYTE_DIFFERENTIATION	0.00663448	arterytibial
0.00017349	GO_CARDIAC_MUSCLE_CELL_DIFFERENTIATION	0.00663448	arterytibial
0.000167555	GO_NEUROGENESIS	0.00663636	adiposesubcutaneous
0.000688066	GO_DEFENSE_RESPONSE_TO_GRAM_NEGATIVE_BACTERIUM	0.00666432	wholeblood
0.000695467	GO_NUCLEAR_ENVELOPE_ORGANIZATION	0.00672133	wholeblood
5.18985e-05	GO_SENSORY_ORGAN_DEVELOPMENT	0.00677123	skinsunexposedlowerleg
0.000321046	GO_MULTIVESICULAR_BODY_ORGANIZATION	0.00686159	muscleskeletal
0.000321734	GO_FATTY_ACID_METABOLIC_PROCESS	0.00686159	muscleskeletal
0.000184281	GO_MUSCLE_TISSUE_DEVELOPMENT	0.00698692	arterytibial
0.000133354	GO_MELANIN_METABOLIC_PROCESS	0.00702429	skins
0.000134595	GO_REGULATION_OF_WATER_LOSS_VIA_SKIN	0.00702429	skins
0.000188137	GO_REGULATION_OF_SMOOTH_MUSCLE_CELL_DIFFERENTIATION	0.00707267	arterytibial
0.000138277	GO_TELOMERE_MAINTENANCE_VIA_TELOMERASE	0.00713253	skins
0.000182275	GO_NEURON_RECOGNITION	0.0071555	adiposesubcutaneous
0.000742095	GO_CELLULAR_MACROMOLECULE_LOCALIZATION	0.00715637	wholeblood
0.000109722	GO_REGULATION_OF_CENTROSOME_CYCLE	0.00715777	esophagusmucosa
0.000342676	GO_MEMBRANE_ORGANIZATION	0.00727326	muscleskeletal
3.93979e-05	GO_SKIN_EPIDERMIS_DEVELOPMENT	0.00728204	skinnotsunexposedsuprapubic
0.000114512	GO_RESPONSE_TO_XENOBIOTIC_STIMULUS	0.00736196	esophagusmucosa
0.00018934	GO_FATTY_ACID_BETA_OXIDATION	0.00736765	adiposesubcutaneous
0.000765892	GO_REGULATION_OF_EXTRINSIC_APOPTOTIC_SIGNALING_PATHWAY_VIA_DEATH_DOMAIN_RECEPTORS	0.00736985	wholeblood
0.00035033	GO_ENERGY_RESERVE_METABOLIC_PROCESS	0.00740031	muscleskeletal
0.000199054	GO_NEUROTROPHIN_SIGNALING_PATHWAY	0.00742019	arterytibial
0.000193571	GO_CELLULAR_RESPONSE_TO_PEPTIDE	0.0074668	adiposesubcutaneous
0.00020454	GO_NEGATIVE_REGULATION_OF_CYTOPLASMIC_TRANSPORT	0.00756117	arterytibial
0.000794821	GO_REGULATION_OF_GTPASE_ACTIVITY	0.00763166	wholeblood
0.000209594	GO_CELL_PART_MORPHOGENESIS	0.00768395	arterytibial
0.000802532	GO_B_CELL_MEDIATED_IMMUNITY	0.00768905	wholeblood
0.000806707	GO_RESPONSE_TO_AMMONIUM_ION	0.00769581	wholeblood
0.000806707	GO_THYMOCYTE_AGGREGATION	0.00769581	wholeblood
0.000815324	GO_POSITIVE_REGULATION_OF_ACUTE_INFLAMMATORY_RESPONSE	0.00776133	wholeblood
0.00037004	GO_REGULATION_OF_ORGANELLE_ORGANIZATION	0.00777961	muscleskeletal
0.000826919	GO_POSITIVE_REGULATION_OF_INTERLEUKIN_8_SECRETION	0.00780471	wholeblood
0.000826919	GO_HEPATOCYTE_APOPTOTIC_PROCESS	0.00780471	wholeblood
0.000826919	GO_NEGATIVE_REGULATION_OF_MYELOID_CELL_APOPTOTIC_PROCESS	0.00780471	wholeblood
0.000826919	GO_NEGATIVE_REGULATION_OF_CD4_POSITIVE_ALPHA_BETA_T_CELL_ACTIVATION	0.00780471	wholeblood
0.00082983	GO_PROTEASOMAL_PROTEIN_CATABOLIC_PROCESS	0.00781555	wholeblood
7.04835e-05	GO_REGULATION_OF_CELL_DEVELOPMENT	0.00781662	lung
0.000216036	GO_EMBRYO_DEVELOPMENT_ENDING_IN_BIRTH_OR_EGG_HATCHING	0.00782909	arterytibial
0.000217082	GO_LOCOMOTION	0.00782909	arterytibial
0.000375586	GO_PROTEIN_LOCALIZATION	0.00783215	muscleskeletal
0.00037607	GO_GLUCAN_METABOLIC_PROCESS	0.00783215	muscleskeletal
0.000220566	GO_RESPONSE_TO_WOUNDING	0.0078842	arterytibial
0.000222165	GO_WOUND_HEALING	0.0078842	arterytibial
0.000381218	GO_REGULATION_OF_CARBOHYDRATE_METABOLIC_PROCESS	0.00790226	muscleskeletal
0.000208957	GO_REGULATION_OF_MACROPHAGE_DERIVED_FOAM_CELL_DIFFERENTIATION	0.00799079	adiposesubcutaneous
7.53209e-05	GO_TISSUE_MORPHOGENESIS	0.00805117	lung
7.78182e-05	GO_SENSORY_ORGAN_DEVELOPMENT	0.00805117	lung
7.80433e-05	GO_EMBRYONIC_DIGESTIVE_TRACT_DEVELOPMENT	0.00805117	lung
0.000390917	GO_CELL_CYCLE_PROCESS	0.00806561	muscleskeletal
0.000128203	GO_DNA_STRAND_ELONGATION	0.00812441	esophagusmucosa
0.000214407	GO_REGULATION_OF_NOREPINEPHRINE_SECRETION	0.00812913	adiposesubcutaneous
8.28572e-05	GO_G_PROTEIN_COUPLED_RECEPTOR_SIGNALING_PATHWAY	0.00818109	lung
8.29912e-05	GO_REGULATION_OF_CELL_PROJECTION_ORGANIZATION	0.00818109	lung
0.000219822	GO_REGULATION_OF_AMINE_TRANSPORT	0.0082394	adiposesubcutaneous
0.00022103	GO_SULFUR_COMPOUND_METABOLIC_PROCESS	0.0082394	adiposesubcutaneous
0.0002257	GO_POSITIVE_REGULATION_OF_VASCULATURE_DEVELOPMENT	0.00826983	adiposesubcutaneous
0.00022906	GO_BEHAVIOR	0.00826983	adiposesubcutaneous
0.000229303	GO_BLOOD_VESSEL_ENDOTHELIAL_CELL_MIGRATION	0.00826983	adiposesubcutaneous
0.000229303	GO_CARDIAC_EPITHELIAL_TO_MESENCHYMAL_TRANSITION	0.00826983	adiposesubcutaneous
0.000406545	GO_REGULATION_OF_MRNA_SPLICING_VIA_SPLICEOSOME	0.00834361	muscleskeletal
0.000408152	GO_ORGANELLE_DISASSEMBLY	0.00834361	muscleskeletal
0.0008897	GO_POSITIVE_REGULATION_OF_BIOSYNTHETIC_PROCESS	0.00836167	wholeblood
0.000893735	GO_DOPAMINE_RECEPTOR_SIGNALING_PATHWAY	0.00838183	wholeblood
0.000421609	GO_NEGATIVE_REGULATION_OF_MRNA_METABOLIC_PROCESS	0.00857917	muscleskeletal
9.45462e-05	GO_ADULT_BEHAVIOR	0.00873765	nervetibial
0.000946108	GO_POSITIVE_REGULATION_OF_GENE_EXPRESSION	0.00879674	wholeblood
0.00094704	GO_POSITIVE_REGULATION_OF_INTERFERON_ALPHA_PRODUCTION	0.00879674	wholeblood
0.000953887	GO_MODIFICATION_OF_MORPHOLOGY_OR_PHYSIOLOGY_OF_OTHER_ORGANISM	0.00879674	wholeblood
0.000954064	GO_REGULATION_OF_B_CELL_DIFFERENTIATION	0.00879674	wholeblood
0.000954064	GO_REGULATION_OF_CYSTEINE_TYPE_ENDOPEPTIDASE_ACTIVITY_INVOLVED_IN_APOPTOTIC_SIGNALING_PATHWAY	0.00879674	wholeblood
0.000954064	GO_POSITIVE_REGULATION_OF_INTERLEUKIN_4_PRODUCTION	0.00879674	wholeblood
0.000954064	GO_REGULATION_OF_RESPONSE_TO_INTERFERON_GAMMA	0.00879674	wholeblood
0.000954693	GO_REGULATION_OF_RELEASE_OF_CYTOCHROME_C_FROM_MITOCHONDRIA	0.00879674	wholeblood
0.000955822	GO_MACROMOLECULAR_COMPLEX_ASSEMBLY	0.00879674	wholeblood
9.13717e-05	GO_EMBRYO_DEVELOPMENT	0.00881141	lung
9.49788e-05	GO_DIGESTIVE_SYSTEM_DEVELOPMENT	0.00881972	lung
9.54343e-05	GO_REGULATION_OF_ENDOTHELIAL_CELL_APOPTOTIC_PROCESS	0.00881972	lung
0.000971149	GO_PROTEIN_POLYMERIZATION	0.00891929	wholeblood
0.00097966	GO_THYMIC_T_CELL_SELECTION	0.00894192	wholeblood
0.00097966	GO_INNATE_IMMUNE_RESPONSE_IN_MUCOSA	0.00894192	wholeblood
0.00097966	GO_RESPONSE_TO_PROTOZOAN	0.00894192	wholeblood
0.000254955	GO_REGULATION_OF_MAPK_CASCADE	0.0091208	adiposesubcutaneous
0.000179113	GO_CHROMOSOME_SEGREGATION	0.00913271	skins
0.000260012	GO_TRANSMEMBRANE_RECEPTOR_PROTEIN_SERINE_THREONINE_KINASE_SIGNALING_PATHWAY	0.00915409	arterytibial
0.000101299	GO_EMBRYONIC_MORPHOGENESIS	0.00917068	lung
0.000457476	GO_REGULATION_OF_APOPTOTIC_SIGNALING_PATHWAY	0.00926649	muscleskeletal
0.00102114	GO_CYTOSOLIC_TRANSPORT	0.00930137	wholeblood
0.000107421	GO_NEGATIVE_REGULATION_OF_EXTRINSIC_APOPTOTIC_SIGNALING_PATHWAY_VIA_DEATH_DOMAIN_RECEPTORS	0.00944257	lung
0.00010856	GO_REGULATION_OF_HYDROLASE_ACTIVITY	0.00944257	lung
0.000271715	GO_EAR_DEVELOPMENT	0.00964262	adiposesubcutaneous
0.00107402	GO_CYTOPLASMIC_PATTERN_RECOGNITION_RECEPTOR_SIGNALING_PATHWAY	0.00976303	wholeblood
0.000195398	GO_ORGANIC_CYCLIC_COMPOUND_CATABOLIC_PROCESS	0.00983203	skins
0.000197261	GO_ORGANELLE_FISSION	0.00983203	skins
0.00028258	GO_MUSCLE_HYPERTROPHY	0.00987027	arterytibial
0.000285871	GO_REGULATION_OF_CAMP_METABOLIC_PROCESS	0.0100068	adiposesubcutaneous
0.000287548	GO_REGULATION_OF_CATECHOLAMINE_SECRETION	0.0100068	adiposesubcutaneous
0.000288744	GO_ALPHA_AMINO_ACID_METABOLIC_PROCESS	0.0100068	adiposesubcutaneous
0.000291839	GO_FORMATION_OF_PRIMARY_GERM_LAYER	0.0101141	arterytibial
0.000112064	GO_NEGATIVE_REGULATION_OF_CELL_PROJECTION_ORGANIZATION	0.0101452	nervetibial
0.000296827	GO_CONNECTIVE_TISSUE_DEVELOPMENT	0.0102031	adiposesubcutaneous
0.000303227	GO_WHITE_FAT_CELL_DIFFERENTIATION	0.0102031	adiposesubcutaneous
0.000303227	GO_REGULATION_OF_CHOLESTEROL_STORAGE	0.0102031	adiposesubcutaneous
0.000305908	GO_SPROUTING_ANGIOGENESIS	0.0102031	adiposesubcutaneous
0.000305908	GO_SMOOTH_MUSCLE_CONTRACTION	0.0102031	adiposesubcutaneous
0.00112602	GO_GLYCOSYL_COMPOUND_CATABOLIC_PROCESS	0.0102147	wholeblood
0.000297895	GO_LONG_TERM_SYNAPTIC_POTENTIATION	0.0102439	arterytibial
0.00113917	GO_EPHRIN_RECEPTOR_SIGNALING_PATHWAY	0.010313	wholeblood
0.00114248	GO_REGULATION_OF_CELL_PROLIFERATION	0.0103219	wholeblood
0.00115102	GO_ANTIGEN_PROCESSING_AND_PRESENTATION_OF_PEPTIDE_ANTIGEN_VIA_MHC_CLASS_I	0.0103779	wholeblood
0.00115707	GO_CELLULAR_MONOVALENT_INORGANIC_CATION_HOMEOSTASIS	0.0104113	wholeblood
0.00115979	GO_REGULATION_OF_PEPTIDYL_TYROSINE_PHOSPHORYLATION	0.0104146	wholeblood
8.21802e-05	GO_CELL_MORPHOGENESIS_INVOLVED_IN_DIFFERENTIATION	0.0104158	skinsunexposedlowerleg
0.000315522	GO_REGULATION_OF_CELL_PROLIFERATION	0.0104452	adiposesubcutaneous
0.000306375	GO_REGULATION_OF_HEART_CONTRACTION	0.0104544	arterytibial
0.0011754	GO_POSITIVE_REGULATION_OF_ACTIN_FILAMENT_POLYMERIZATION	0.0105335	wholeblood
0.00117802	GO_ORGANELLE_LOCALIZATION	0.0105357	wholeblood
8.60989e-05	GO_CELLULAR_LIPID_METABOLIC_PROCESS	0.0106093	skinsunexposedlowerleg
6.07089e-05	GO_PROXIMAL_DISTAL_PATTERN_FORMATION	0.0106204	skinnotsunexposedsuprapubic
6.22478e-05	GO_NEUROGENESIS	0.0106204	skinnotsunexposedsuprapubic
0.000173434	GO_CELLULAR_LIPID_METABOLIC_PROCESS	0.010836	esophagusmucosa
0.00121913	GO_PROTEIN_MONOUBIQUITINATION	0.0108814	wholeblood
0.000221667	GO_TRNA_TRANSPORT	0.0109257	skins
0.000332677	GO_REGULATION_OF_G_PROTEIN_COUPLED_RECEPTOR_PROTEIN_SIGNALING_PATHWAY	0.0109315	adiposesubcutaneous
0.000225315	GO_MITOTIC_NUCLEAR_DIVISION	0.0109835	skins
0.00018255	GO_REGULATION_OF_CELL_CYCLE_PHASE_TRANSITION	0.0111015	esophagusmucosa
0.00018269	GO_MITOTIC_CYTOKINESIS	0.0111015	esophagusmucosa
0.0005574	GO_RESPONSE_TO_ISCHEMIA	0.0112392	muscleskeletal
0.000562288	GO_PROTEIN_AUTOUBIQUITINATION	0.0112622	muscleskeletal
0.000563618	GO_MONOCARBOXYLIC_ACID_METABOLIC_PROCESS	0.0112622	muscleskeletal
0.00018974	GO_EPHRIN_RECEPTOR_SIGNALING_PATHWAY	0.0113315	esophagusmucosa
0.000191583	GO_FATTY_ACID_DERIVATIVE_METABOLIC_PROCESS	0.0113315	esophagusmucosa
0.000133319	GO_REGULATION_OF_BLOOD_CIRCULATION	0.0113732	lung
0.000573925	GO_MITOTIC_CELL_CYCLE	0.0114167	muscleskeletal
0.000238324	GO_NUCLEOBASE_CONTAINING_COMPOUND_TRANSPORT	0.0114914	skins
0.000340529	GO_REGULATION_OF_AMINE_TRANSPORT	0.0115312	arterytibial
0.000362707	GO_CYCLIC_NUCLEOTIDE_CATABOLIC_PROCESS	0.0117223	adiposesubcutaneous
0.000362707	GO_REGULATION_OF_TRIGLYCERIDE_BIOSYNTHETIC_PROCESS	0.0117223	adiposesubcutaneous
0.000364671	GO_REGULATION_OF_HORMONE_LEVELS	0.0117223	adiposesubcutaneous
0.000596147	GO_TRANSCRIPTION_COUPLED_NUCLEOTIDE_EXCISION_REPAIR	0.0117592	muscleskeletal
0.000596444	GO_SKELETAL_MUSCLE_ORGAN_DEVELOPMENT	0.0117592	muscleskeletal
0.000368597	GO_SENSORY_ORGAN_DEVELOPMENT	0.0117633	adiposesubcutaneous
0.000599404	GO_REGULATION_OF_MUSCLE_TISSUE_DEVELOPMENT	0.0117653	muscleskeletal
0.000350321	GO_POSITIVE_REGULATION_OF_STEM_CELL_DIFFERENTIATION	0.0117729	arterytibial
0.0013224	GO_PHAGOSOME_MATURATION	0.0117795	wholeblood
0.00133034	GO_VASCULAR_ENDOTHELIAL_GROWTH_FACTOR_RECEPTOR_SIGNALING_PATHWAY	0.0118264	wholeblood
0.000605404	GO_ANTIGEN_PROCESSING_AND_PRESENTATION_OF_PEPTIDE_ANTIGEN	0.0118307	muscleskeletal
0.000134827	GO_WALKING_BEHAVIOR	0.0119618	nervetibial
0.00136658	GO_REGULATION_OF_T_CELL_CHEMOTAXIS	0.012076	wholeblood
0.00136658	GO_TOLERANCE_INDUCTION	0.012076	wholeblood
0.00136658	GO_MACROPHAGE_ACTIVATION_INVOLVED_IN_IMMUNE_RESPONSE	0.012076	wholeblood
0.00137675	GO_ACTIVATION_OF_PHOSPHOLIPASE_C_ACTIVITY	0.0120935	wholeblood
0.00137675	GO_NEGATIVE_REGULATION_OF_EXOCYTOSIS	0.0120935	wholeblood
0.00137675	GO_NATURAL_KILLER_CELL_MEDIATED_IMMUNITY	0.0120935	wholeblood
0.00138343	GO_POSITIVE_REGULATION_OF_PROTEIN_POLYMERIZATION	0.0121282	wholeblood
0.000384632	GO_REGULATION_OF_CELL_ADHESION_MEDIATED_BY_INTEGRIN	0.0121873	adiposesubcutaneous
0.000208952	GO_GLAND_DEVELOPMENT	0.0121962	esophagusmucosa
0.000145725	GO_POSITIVE_REGULATION_OF_VASOCONSTRICTION	0.0121969	lung
0.000632318	GO_PROTEASOME_ASSEMBLY	0.0122487	muscleskeletal
0.000632318	GO_NEGATIVE_REGULATION_OF_NUCLEOTIDE_CATABOLIC_PROCESS	0.0122487	muscleskeletal
0.000102232	GO_MORPHOGENESIS_OF_EMBRYONIC_EPITHELIUM	0.0122568	skinsunexposedlowerleg
0.000393044	GO_OUTFLOW_TRACT_MORPHOGENESIS	0.0122828	adiposesubcutaneous
0.000393182	GO_POSITIVE_REGULATION_OF_CYCLIC_NUCLEOTIDE_METABOLIC_PROCESS	0.0122828	adiposesubcutaneous
0.00014216	GO_REGULATION_OF_NEURONAL_SYNAPTIC_PLASTICITY	0.0123652	nervetibial
0.00142231	GO_NEGATIVE_REGULATION_OF_INTRACELLULAR_SIGNAL_TRANSDUCTION	0.0124366	wholeblood
0.00142421	GO_CELLULAR_RESPONSE_TO_NITROGEN_COMPOUND	0.0124366	wholeblood
0.000375212	GO_NEURONAL_STEM_CELL_DIVISION	0.0124859	arterytibial
0.000377166	GO_TRANSMEMBRANE_RECEPTOR_PROTEIN_TYROSINE_KINASE_SIGNALING_PATHWAY	0.0124859	arterytibial
0.00143574	GO_POSITIVE_REGULATION_OF_STRESS_ACTIVATED_PROTEIN_KINASE_SIGNALING_CASCADE	0.0125127	wholeblood
0.00065339	GO_MRNA_PROCESSING	0.0126019	muscleskeletal
0.000406764	GO_POSITIVE_REGULATION_OF_PEPTIDYL_SERINE_PHOSPHORYLATION	0.0126182	adiposesubcutaneous
0.0014588	GO_SECRETION_BY_CELL	0.0126887	wholeblood
0.00146403	GO_POSITIVE_REGULATION_OF_NEURON_APOPTOTIC_PROCESS	0.0127093	wholeblood
0.000267021	GO_KERATINIZATION	0.0127366	skins
0.00147749	GO_INTRINSIC_APOPTOTIC_SIGNALING_PATHWAY	0.0128011	wholeblood
0.000156283	GO_REGULATION_OF_MULTICELLULAR_ORGANISMAL_DEVELOPMENT	0.0128384	lung
0.000162732	GO_ORGAN_MORPHOGENESIS	0.0129201	lung
0.000163104	GO_REGULATION_OF_SYSTEM_PROCESS	0.0129201	lung
0.00150156	GO_REGULATION_OF_CHEMOKINE_PRODUCTION	0.0129843	wholeblood
0.000423786	GO_REGULATION_OF_VASCULAR_PERMEABILITY	0.0130233	adiposesubcutaneous
0.000425694	GO_NEURON_PROJECTION_DEVELOPMENT	0.0130233	adiposesubcutaneous
0.000678291	GO_RNA_SPLICING	0.0130255	muscleskeletal
0.000396404	GO_ACTOMYOSIN_STRUCTURE_ORGANIZATION	0.0130256	arterytibial
0.00151871	GO_REGULATION_OF_MYELOID_CELL_APOPTOTIC_PROCESS	0.0130309	wholeblood
0.00151871	GO_POSITIVE_REGULATION_OF_COAGULATION	0.0130309	wholeblood
0.00151871	GO_REGULATION_OF_ANTIGEN_PROCESSING_AND_PRESENTATION	0.0130309	wholeblood
0.00151871	GO_CYTOLYSIS	0.0130309	wholeblood
0.00153036	GO_ACTIN_FILAMENT_ORGANIZATION	0.0131055	wholeblood
0.000401991	GO_REGULATION_OF_STEM_CELL_DIFFERENTIATION	0.013112	arterytibial
0.000230384	GO_REGULATION_OF_ATTACHMENT_OF_SPINDLE_MICROTUBULES_TO_KINETOCHORE	0.0132524	esophagusmucosa
0.000233022	GO_NEGATIVE_REGULATION_OF_CELL_CYCLE	0.0132524	esophagusmucosa
0.0015515	GO_NEGATIVE_REGULATION_OF_CYTOKINE_SECRETION	0.013261	wholeblood
0.000170805	GO_REGULATION_OF_SMOOTH_MUSCLE_CONTRACTION	0.0132928	lung
0.000439279	GO_NEPHRON_DEVELOPMENT	0.0133469	adiposesubcutaneous
0.000442754	GO_GLYCEROLIPID_METABOLIC_PROCESS	0.0133609	adiposesubcutaneous
0.000707814	GO_CELL_CYCLE	0.0134768	muscleskeletal
0.000707867	GO_INNER_MITOCHONDRIAL_MEMBRANE_ORGANIZATION	0.0134768	muscleskeletal
0.00158957	GO_ACTIVATION_OF_PROTEIN_KINASE_ACTIVITY	0.0135603	wholeblood
0.000715925	GO_2_OXOGLUTARATE_METABOLIC_PROCESS	0.013572	muscleskeletal
0.00161064	GO_TOLL_LIKE_RECEPTOR_9_SIGNALING_PATHWAY	0.0135833	wholeblood
0.00161064	GO_POSITIVE_REGULATION_OF_T_CELL_MEDIATED_CYTOTOXICITY	0.0135833	wholeblood
0.00161064	GO_POSITIVE_REGULATION_OF_NITRIC_OXIDE_SYNTHASE_BIOSYNTHETIC_PROCESS	0.0135833	wholeblood
0.00161064	GO_POSITIVE_REGULATION_OF_T_CELL_CYTOKINE_PRODUCTION	0.0135833	wholeblood
0.00161064	GO_RESPONSE_TO_HYDROPEROXIDE	0.0135833	wholeblood
0.00161064	GO_REGULATION_OF_INTERLEUKIN_6_BIOSYNTHETIC_PROCESS	0.0135833	wholeblood
0.00161623	GO_PYRIMIDINE_CONTAINING_COMPOUND_METABOLIC_PROCESS	0.0136046	wholeblood
0.00162961	GO_NEGATIVE_REGULATION_OF_REGULATED_SECRETORY_PATHWAY	0.0136653	wholeblood
0.00162961	GO_RUFFLE_ORGANIZATION	0.0136653	wholeblood
0.000181139	GO_MANGANESE_ION_TRANSPORT	0.0138078	lung
0.000183648	GO_CELL_MOTILITY	0.0138078	lung
0.000734207	GO_RNA_PROCESSING	0.0138593	muscleskeletal
0.00167662	GO_NUCLEAR_ENVELOPE_REASSEMBLY	0.0139279	wholeblood
0.00167662	GO_MEMBRANE_RAFT_ORGANIZATION	0.0139279	wholeblood
0.00167662	GO_REGULATION_OF_INTERLEUKIN_2_BIOSYNTHETIC_PROCESS	0.0139279	wholeblood
0.00167662	GO_POSITIVE_REGULATION_OF_T_HELPER_CELL_DIFFERENTIATION	0.0139279	wholeblood
0.00167662	GO_POSITIVE_REGULATION_OF_CYSTEINE_TYPE_ENDOPEPTIDASE_ACTIVITY_INVOLVED_IN_APOPTOTIC_SIGNALING_PATHWAY	0.0139279	wholeblood
0.00168006	GO_POSITIVE_REGULATION_OF_INTRACELLULAR_TRANSPORT	0.0139304	wholeblood
0.000248971	GO_RECOMBINATIONAL_REPAIR	0.0139802	esophagusmucosa
8.63408e-05	GO_LIPID_BIOSYNTHETIC_PROCESS	0.013999	skinnotsunexposedsuprapubic
8.83616e-05	GO_NEURON_PROJECTION_DEVELOPMENT	0.013999	skinnotsunexposedsuprapubic
0.00046863	GO_POSITIVE_REGULATION_OF_LIPID_BIOSYNTHETIC_PROCESS	0.0140462	adiposesubcutaneous
0.000752206	GO_REGULATION_OF_SODIUM_ION_TRANSPORT	0.0140554	muscleskeletal
0.000752206	GO_VESICLE_COATING	0.0140554	muscleskeletal
0.000754098	GO_CARDIAC_MUSCLE_TISSUE_MORPHOGENESIS	0.0140554	muscleskeletal
0.000434907	GO_SMOOTH_MUSCLE_CONTRACTION	0.0140821	arterytibial
0.000761406	GO_REGULATION_OF_STRIATED_MUSCLE_CELL_DIFFERENTIATION	0.0141322	muscleskeletal
0.000444584	GO_CARDIAC_VENTRICLE_DEVELOPMENT	0.0141743	arterytibial
0.000450535	GO_EMBRYONIC_DIGIT_MORPHOGENESIS	0.0141743	arterytibial
0.000450535	GO_REGULATION_OF_SMOOTH_MUSCLE_CONTRACTION	0.0141743	arterytibial
0.000450535	GO_POSITIVE_REGULATION_OF_PHOSPHATIDYLINOSITOL_3_KINASE_SIGNALING	0.0141743	arterytibial
9.51882e-05	GO_GLAND_DEVELOPMENT	0.0141964	skinnotsunexposedsuprapubic
9.60079e-05	GO_CELL_FATE_COMMITMENT	0.0141964	skinnotsunexposedsuprapubic
0.000458553	GO_NEGATIVE_REGULATION_OF_CHONDROCYTE_DIFFERENTIATION	0.0143249	arterytibial
0.000779186	GO_NEGATIVE_REGULATION_OF_CELLULAR_CATABOLIC_PROCESS	0.014402	muscleskeletal
0.000484078	GO_CARDIAC_CHAMBER_MORPHOGENESIS	0.0144119	adiposesubcutaneous
0.000489143	GO_WATER_SOLUBLE_VITAMIN_METABOLIC_PROCESS	0.0144656	adiposesubcutaneous
0.0017563	GO_NEGATIVE_REGULATION_OF_ERBB_SIGNALING_PATHWAY	0.0144813	wholeblood
0.0017563	GO_PYRIMIDINE_NUCLEOSIDE_METABOLIC_PROCESS	0.0144813	wholeblood
0.0017563	GO_NEURON_DEATH	0.0144813	wholeblood
0.00176999	GO_REGULATION_OF_DEPHOSPHORYLATION	0.0145671	wholeblood
0.00179081	GO_NEGATIVE_REGULATION_OF_CELLULAR_RESPONSE_TO_INSULIN_STIMULUS	0.0146299	wholeblood
0.00179081	GO_MYD88_INDEPENDENT_TOLL_LIKE_RECEPTOR_SIGNALING_PATHWAY	0.0146299	wholeblood
0.00179081	GO_POSITIVE_REGULATION_OF_INTERLEUKIN_2_PRODUCTION	0.0146299	wholeblood
0.00179081	GO_POSITIVE_REGULATION_OF_T_CELL_MEDIATED_IMMUNITY	0.0146299	wholeblood
0.000311175	GO_TRANSCRIPTION_FROM_RNA_POLYMERASE_I_PROMOTER	0.0146848	skins
0.000130222	GO_CELL_MORPHOGENESIS_INVOLVED_IN_NEURON_DIFFERENTIATION	0.01482	skinsunexposedlowerleg
0.000130293	GO_NEURON_PROJECTION_DEVELOPMENT	0.01482	skinsunexposedlowerleg
0.000479502	GO_RESPONSE_TO_TRANSFORMING_GROWTH_FACTOR_BETA	0.0148746	arterytibial
0.000810651	GO_NEGATIVE_REGULATION_OF_PROTEIN_POLYMERIZATION	0.0149214	muscleskeletal
0.000484424	GO_VASCULAR_PROCESS_IN_CIRCULATORY_SYSTEM	0.0149229	arterytibial
0.00183589	GO_PROTEIN_MATURATION	0.0149236	wholeblood
0.00184022	GO_PH_REDUCTION	0.0149236	wholeblood
0.00184022	GO_POSITIVE_REGULATION_OF_CALCIUM_MEDIATED_SIGNALING	0.0149236	wholeblood
0.00184022	GO_SPLEEN_DEVELOPMENT	0.0149236	wholeblood
0.00013478	GO_CENTRAL_NERVOUS_SYSTEM_NEURON_DIFFERENTIATION	0.0149471	skinsunexposedlowerleg
0.00187231	GO_SINGLE_ORGANISM_CELLULAR_LOCALIZATION	0.0151561	wholeblood
0.00188699	GO_NEGATIVE_REGULATION_OF_CELLULAR_COMPONENT_ORGANIZATION	0.0152472	wholeblood
0.00190196	GO_ANTIGEN_PROCESSING_AND_PRESENTATION_OF_EXOGENOUS_PEPTIDE_ANTIGEN_VIA_MHC_CLASS_I	0.0153402	wholeblood
0.000110221	GO_NEURON_PROJECTION_GUIDANCE	0.0155186	skinnotsunexposedsuprapubic
0.000111946	GO_SENSORY_ORGAN_MORPHOGENESIS	0.0155186	skinnotsunexposedsuprapubic
0.000529609	GO_LOCOMOTORY_BEHAVIOR	0.0155586	adiposesubcutaneous
0.000118704	GO_NEURON_PROJECTION_MORPHOGENESIS	0.0156132	skinnotsunexposedsuprapubic
0.000121968	GO_CELL_MORPHOGENESIS_INVOLVED_IN_NEURON_DIFFERENTIATION	0.0156132	skinnotsunexposedsuprapubic
0.000125267	GO_CELL_JUNCTION_ORGANIZATION	0.0156132	skinnotsunexposedsuprapubic
0.000126708	GO_NEURON_DEVELOPMENT	0.0156132	skinnotsunexposedsuprapubic
0.000856148	GO_PYRUVATE_METABOLIC_PROCESS	0.0156514	muscleskeletal
0.000857368	GO_REGULATION_OF_ORGANELLE_ASSEMBLY	0.0156514	muscleskeletal
0.000511756	GO_NEGATIVE_REGULATION_OF_NUCLEOCYTOPLASMIC_TRANSPORT	0.0156562	arterytibial
0.000212096	GO_REGULATION_OF_TRANSMEMBRANE_RECEPTOR_PROTEIN_SERINE_THREONINE_KINASE_SIGNALING_PATHWAY	0.0156809	lung
0.00194804	GO_RESPONSE_TO_INTERLEUKIN_1	0.0156833	wholeblood
0.00054201	GO_POSITIVE_REGULATION_OF_CAMP_METABOLIC_PROCESS	0.0157737	adiposesubcutaneous
0.000544045	GO_LIPID_PARTICLE_ORGANIZATION	0.0157737	adiposesubcutaneous
0.000218618	GO_REGULATION_OF_SECRETION	0.0157919	lung
0.000220716	GO_PROTEIN_KINASE_C_ACTIVATING_G_PROTEIN_COUPLED_RECEPTOR_SIGNALING_PATHWAY	0.0157919	lung
0.000878482	GO_REGULATION_OF_SODIUM_ION_TRANSMEMBRANE_TRANSPORTER_ACTIVITY	0.0159711	muscleskeletal
0.000557001	GO_REGULATION_OF_POSITIVE_CHEMOTAXIS	0.0160445	adiposesubcutaneous
0.000291831	GO_POSITIVE_REGULATION_OF_ORGANELLE_ORGANIZATION	0.016182	esophagusmucosa
0.00201371	GO_STRESS_ACTIVATED_PROTEIN_KINASE_SIGNALING_CASCADE	0.0161827	wholeblood
0.000150543	GO_COLUMNAR_CUBOIDAL_EPITHELIAL_CELL_DIFFERENTIATION	0.0162881	skinsunexposedlowerleg
0.000231391	GO_REGULATION_OF_CELL_MORPHOGENESIS_INVOLVED_IN_DIFFERENTIATION	0.0162929	lung
0.000569416	GO_POSITIVE_REGULATION_OF_EPITHELIAL_CELL_PROLIFERATION	0.0162963	adiposesubcutaneous
0.000235796	GO_NEGATIVE_REGULATION_OF_MULTICELLULAR_ORGANISMAL_PROCESS	0.0163436	lung
0.000584823	GO_BILE_ACID_BIOSYNTHETIC_PROCESS	0.0163666	adiposesubcutaneous
0.000584823	GO_POSITIVE_REGULATION_OF_TRIGLYCERIDE_METABOLIC_PROCESS	0.0163666	adiposesubcutaneous
0.000586629	GO_REGULATION_OF_TRIGLYCERIDE_METABOLIC_PROCESS	0.0163666	adiposesubcutaneous
0.000586629	GO_REGULATION_OF_SYSTEMIC_ARTERIAL_BLOOD_PRESSURE_BY_HORMONE	0.0163666	adiposesubcutaneous
0.000539074	GO_ACTIN_FILAMENT_BASED_MOVEMENT	0.016379	arterytibial
0.00204499	GO_DNA_PACKAGING	0.0164043	wholeblood
0.00205627	GO_NUCLEOTIDE_BINDING_DOMAIN_LEUCINE_RICH_REPEAT_CONTAINING_RECEPTOR_SIGNALING_PATHWAY	0.0164354	wholeblood
0.00205627	GO_POSITIVE_REGULATION_OF_NF_KAPPAB_IMPORT_INTO_NUCLEUS	0.0164354	wholeblood
0.000300492	GO_MITOTIC_CHROMOSOME_CONDENSATION	0.0164566	esophagusmucosa
0.000546245	GO_STRIATED_MUSCLE_CELL_DIFFERENTIATION	0.016484	arterytibial
0.000200547	GO_MULTICELLULAR_ORGANISMAL_SIGNALING	0.0164853	nervetibial
0.000200678	GO_SCHWANN_CELL_DEVELOPMENT	0.0164853	nervetibial
0.000200678	GO_NEURONAL_ACTION_POTENTIAL	0.0164853	nervetibial
0.0020705	GO_NEGATIVE_REGULATION_OF_CYSTEINE_TYPE_ENDOPEPTIDASE_ACTIVITY	0.0165193	wholeblood
0.000359454	GO_RNA_PHOSPHODIESTER_BOND_HYDROLYSIS	0.0167846	skins
0.000566198	GO_ACTIN_FILAMENT_BUNDLE_ORGANIZATION	0.0168117	arterytibial
0.000568474	GO_SMOOTH_MUSCLE_CELL_DIFFERENTIATION	0.0168117	arterytibial
0.000568474	GO_POSITIVE_REGULATION_OF_CALCIUM_ION_TRANSMEMBRANE_TRANSPORTER_ACTIVITY	0.0168117	arterytibial
0.000932888	GO_DNA_TEMPLATED_TRANSCRIPTION_ELONGATION	0.016891	muscleskeletal
0.00036915	GO_NUCLEAR_ENVELOPE_ORGANIZATION	0.0170578	skins
0.000615541	GO_VASCULOGENESIS	0.0170659	adiposesubcutaneous
0.000585672	GO_NEGATIVE_REGULATION_OF_CELL_DEVELOPMENT	0.0172056	arterytibial
0.00016371	GO_NEGATIVE_REGULATION_OF_EPIDERMIS_DEVELOPMENT	0.0172909	skinsunexposedlowerleg
0.00217455	GO_T_CELL_HOMEOSTASIS	0.0173183	wholeblood
0.000972098	GO_NUCLEOTIDE_EXCISION_REPAIR	0.0175294	muscleskeletal
0.000640593	GO_TRABECULA_MORPHOGENESIS	0.0175479	adiposesubcutaneous
0.000640839	GO_REGULATION_OF_ENDOTHELIAL_CELL_PROLIFERATION	0.0175479	adiposesubcutaneous
0.000653722	GO_REGULATION_OF_CELL_JUNCTION_ASSEMBLY	0.0177909	adiposesubcutaneous
0.0010001	GO_REGULATION_OF_MUSCLE_CONTRACTION	0.0178988	muscleskeletal
0.00100469	GO_TRANSCRIPTION_FROM_MITOCHONDRIAL_PROMOTER	0.0178988	muscleskeletal
0.00100469	GO_MITOCHONDRIAL_CALCIUM_ION_TRANSPORT	0.0178988	muscleskeletal
0.00101977	GO_NEGATIVE_REGULATION_OF_WNT_SIGNALING_PATHWAY	0.0180947	muscleskeletal
0.000681395	GO_REGULATION_OF_HORMONE_SECRETION	0.0183639	adiposesubcutaneous
0.000683059	GO_REGULATION_OF_LIPID_BIOSYNTHETIC_PROCESS	0.0183639	adiposesubcutaneous
0.00231165	GO_NEGATIVE_REGULATION_OF_NF_KAPPAB_TRANSCRIPTION_FACTOR_ACTIVITY	0.0183772	wholeblood
0.00232951	GO_CELLULAR_EXTRAVASATION	0.018381	wholeblood
0.00232951	GO_REGULATION_OF_NECROTIC_CELL_DEATH	0.018381	wholeblood
0.00232951	GO_REGULATION_OF_TYPE_I_INTERFERON_MEDIATED_SIGNALING_PATHWAY	0.018381	wholeblood
0.00232951	GO_RIBONUCLEOSIDE_CATABOLIC_PROCESS	0.018381	wholeblood
0.00233284	GO_INTRA_GOLGI_VESICLE_MEDIATED_TRANSPORT	0.018381	wholeblood
0.00104865	GO_REGULATION_OF_NUCLEOTIDE_CATABOLIC_PROCESS	0.0184596	muscleskeletal
0.00104865	GO_NADH_METABOLIC_PROCESS	0.0184596	muscleskeletal
0.000179196	GO_GLAND_DEVELOPMENT	0.0184863	skinsunexposedlowerleg
0.00107709	GO_CARDIAC_MUSCLE_ADAPTATION	0.018664	muscleskeletal
0.00107709	GO_REGULATION_OF_PROTEIN_GLYCOSYLATION	0.018664	muscleskeletal
0.00107709	GO_SARCOPLASMIC_RETICULUM_CALCIUM_ION_TRANSPORT	0.018664	muscleskeletal
0.00107709	GO_REGULATION_OF_SKELETAL_MUSCLE_CONTRACTION	0.018664	muscleskeletal
0.00238767	GO_CELL_CYCLE_PHASE_TRANSITION	0.0187797	wholeblood
0.000347395	GO_MEIOTIC_CELL_CYCLE_PROCESS	0.0187932	esophagusmucosa
0.000704157	GO_RETINOL_METABOLIC_PROCESS	0.0188171	adiposesubcutaneous
0.0023985	GO_ER_TO_GOLGI_VESICLE_MEDIATED_TRANSPORT	0.0188314	wholeblood
0.000189071	GO_CERAMIDE_BIOSYNTHETIC_PROCESS	0.0188495	skinsunexposedlowerleg
0.00019125	GO_CELL_JUNCTION_ORGANIZATION	0.0188495	skinsunexposedlowerleg
0.000195464	GO_ANTERIOR_POSTERIOR_PATTERN_SPECIFICATION	0.0188495	skinsunexposedlowerleg
0.00109342	GO_N_TERMINAL_PROTEIN_AMINO_ACID_MODIFICATION	0.0188661	muscleskeletal
0.00109726	GO_NEGATIVE_REGULATION_OF_TRANSFERASE_ACTIVITY	0.0188661	muscleskeletal
0.000276944	GO_TUBE_MORPHOGENESIS	0.0189004	lung
0.00110461	GO_ENDOSOME_ORGANIZATION	0.0189191	muscleskeletal
0.000354335	GO_CYTOSKELETON_DEPENDENT_CYTOKINESIS	0.0189377	esophagusmucosa
0.000204322	GO_EMBRYONIC_ORGAN_MORPHOGENESIS	0.0189783	skinsunexposedlowerleg
0.000205356	GO_CELL_DEVELOPMENT	0.0189783	skinsunexposedlowerleg
0.000651555	GO_VASOCONSTRICTION	0.0190151	arterytibial
0.00111953	GO_REGULATION_OF_RNA_SPLICING	0.0191009	muscleskeletal
0.000660743	GO_REGULATION_OF_CARDIAC_CONDUCTION	0.0191572	arterytibial
0.00028544	GO_SYNAPSE_ASSEMBLY	0.0191851	lung
0.00245592	GO_REGULATION_OF_CALCIUM_ION_TRANSPORT	0.0192481	wholeblood
0.000670577	GO_CONTRACTILE_ACTIN_FILAMENT_BUNDLE_ASSEMBLY	0.0193161	arterytibial
0.000423513	GO_DNA_TEMPLATED_TRANSCRIPTION_INITIATION	0.0193348	skins
0.000427144	GO_NUCLEAR_CHROMOSOME_SEGREGATION	0.0193348	skins
0.000292052	GO_PERICARDIUM_DEVELOPMENT	0.0193364	lung
0.000161577	GO_CELL_MORPHOGENESIS_INVOLVED_IN_DIFFERENTIATION	0.0193718	skinnotsunexposedsuprapubic
0.000299239	GO_PHOTOTRANSDUCTION	0.0195209	lung
0.000736507	GO_POSITIVE_REGULATION_OF_PROTEIN_METABOLIC_PROCESS	0.0195637	adiposesubcutaneous
0.00250092	GO_NEGATIVE_REGULATION_OF_HOMEOSTATIC_PROCESS	0.0195663	wholeblood
0.000684049	GO_REGULATION_OF_MEMBRANE_POTENTIAL	0.019577	arterytibial
0.00250809	GO_NEGATIVE_REGULATION_OF_LEUKOCYTE_DIFFERENTIATION	0.0195878	wholeblood
0.00251638	GO_PLATELET_AGGREGATION	0.019618	wholeblood
0.000698688	GO_POSITIVE_REGULATION_OF_CELL_MORPHOGENESIS_INVOLVED_IN_DIFFERENTIATION	0.0196544	arterytibial
0.000702676	GO_SENSORY_ORGAN_MORPHOGENESIS	0.0196544	arterytibial
0.000706392	GO_REGULATION_OF_CYTOSKELETON_ORGANIZATION	0.0196544	arterytibial
0.000708692	GO_SKELETAL_SYSTEM_MORPHOGENESIS	0.0196544	arterytibial
0.000708905	GO_AMINOGLYCAN_BIOSYNTHETIC_PROCESS	0.0196544	arterytibial
0.000716455	GO_SOMATIC_STEM_CELL_DIVISION	0.0197403	arterytibial
0.000441204	GO_PIGMENTATION	0.0197695	skins
0.000729636	GO_CARDIAC_CELL_DEVELOPMENT	0.0199794	arterytibial
0.000220794	GO_NEURON_PROJECTION_MORPHOGENESIS	0.0199886	skinsunexposedlowerleg
0.000379644	GO_CYTOKINESIS	0.0200488	esophagusmucosa
0.00258872	GO_NECROPTOTIC_PROCESS	0.0200761	wholeblood
0.00258872	GO_ACTIN_NUCLEATION	0.0200761	wholeblood
0.00258872	GO_CHROMATIN_SILENCING_AT_RDNA	0.0200761	wholeblood
0.000249251	GO_POSITIVE_REGULATION_OF_CELL_DEVELOPMENT	0.0201032	nervetibial
0.00260376	GO_PEPTIDYL_AMINO_ACID_MODIFICATION	0.0201576	wholeblood
0.000386366	GO_POSITIVE_REGULATION_OF_CELL_DIVISION	0.0201638	esophagusmucosa
0.000764899	GO_CELL_MORPHOGENESIS_INVOLVED_IN_NEURON_DIFFERENTIATION	0.020197	adiposesubcutaneous
0.000774264	GO_OXALOACETATE_METABOLIC_PROCESS	0.0202037	adiposesubcutaneous
0.000774264	GO_PARENTAL_BEHAVIOR	0.0202037	adiposesubcutaneous
0.000783106	GO_POSITIVE_REGULATION_OF_NUCLEOTIDE_METABOLIC_PROCESS	0.020315	adiposesubcutaneous
0.00263213	GO_PROTEIN_CATABOLIC_PROCESS	0.0203417	wholeblood
0.00119974	GO_HEME_BIOSYNTHETIC_PROCESS	0.020391	muscleskeletal
0.000791373	GO_NEGATIVE_REGULATION_OF_HORMONE_SECRETION	0.0204101	adiposesubcutaneous
0.00075106	GO_CIRCULATORY_SYSTEM_PROCESS	0.0204399	arterytibial
0.00265277	GO_REGULATION_OF_CHROMOSOME_ORGANIZATION	0.0204656	wholeblood
0.000461645	GO_TRANSCRIPTION_COUPLED_NUCLEOTIDE_EXCISION_REPAIR	0.0204786	skins
0.000474919	GO_PROXIMAL_DISTAL_PATTERN_FORMATION	0.0208588	skins
0.000815577	GO_TRANSMEMBRANE_RECEPTOR_PROTEIN_TYROSINE_KINASE_SIGNALING_PATHWAY	0.0208755	adiposesubcutaneous
0.000818833	GO_POSITIVE_REGULATION_OF_LIPID_CATABOLIC_PROCESS	0.0208755	adiposesubcutaneous
0.0012406	GO_SHORT_CHAIN_FATTY_ACID_METABOLIC_PROCESS	0.0209251	muscleskeletal
0.0012406	GO_MEMBRANE_DEPOLARIZATION_DURING_CARDIAC_MUSCLE_CELL_ACTION_POTENTIAL	0.0209251	muscleskeletal
0.00272102	GO_POSITIVE_REGULATION_OF_CELL_PROLIFERATION	0.0209307	wholeblood
0.00274609	GO_NATURAL_KILLER_CELL_DIFFERENTIATION	0.0209307	wholeblood
0.00274609	GO_I_KAPPAB_PHOSPHORYLATION	0.0209307	wholeblood
0.00274609	GO_HISTONE_H3_K4_TRIMETHYLATION	0.0209307	wholeblood
0.00274609	GO_POSITIVE_REGULATION_OF_INTERLEUKIN_13_PRODUCTION	0.0209307	wholeblood
0.00274609	GO_POSITIVE_REGULATION_OF_T_CELL_APOPTOTIC_PROCESS	0.0209307	wholeblood
0.00274609	GO_POSITIVE_REGULATION_OF_INTERLEUKIN_2_BIOSYNTHETIC_PROCESS	0.0209307	wholeblood
0.000783746	GO_PROXIMAL_DISTAL_PATTERN_FORMATION	0.0210272	arterytibial
0.000783746	GO_HEART_VALVE_DEVELOPMENT	0.0210272	arterytibial
0.000786861	GO_POSITIVE_REGULATION_OF_CELLULAR_COMPONENT_ORGANIZATION	0.0210272	arterytibial
0.00279506	GO_T_HELPER_1_TYPE_IMMUNE_RESPONSE	0.0210865	wholeblood
0.00279506	GO_REGULATION_OF_NITRIC_OXIDE_SYNTHASE_BIOSYNTHETIC_PROCESS	0.0210865	wholeblood
0.00279506	GO_REGULATION_OF_B_CELL_APOPTOTIC_PROCESS	0.0210865	wholeblood
0.00279506	GO_TOLL_LIKE_RECEPTOR_4_SIGNALING_PATHWAY	0.0210865	wholeblood
0.00279506	GO_REGULATION_OF_INTERLEUKIN_8_SECRETION	0.0210865	wholeblood
0.00279506	GO_ESTABLISHMENT_OF_PROTEIN_LOCALIZATION_TO_GOLGI	0.0210865	wholeblood
0.00126242	GO_GOLGI_TO_ENDOSOME_TRANSPORT	0.0211324	muscleskeletal
0.00126242	GO_RESPONSE_TO_MUSCLE_ACTIVITY	0.0211324	muscleskeletal
0.000796646	GO_GASTRULATION	0.0211612	arterytibial
0.000330257	GO_CALCIUM_DEPENDENT_CELL_CELL_ADHESION_VIA_PLASMA_MEMBRANE_CELL_ADHESION_MOLECULES	0.0212322	lung
0.000805236	GO_NEURAL_PRECURSOR_CELL_PROLIFERATION	0.0212621	arterytibial
0.00084624	GO_NEGATIVE_REGULATION_OF_G_PROTEIN_COUPLED_RECEPTOR_PROTEIN_SIGNALING_PATHWAY	0.0213215	adiposesubcutaneous
0.00084624	GO_SERINE_FAMILY_AMINO_ACID_METABOLIC_PROCESS	0.0213215	adiposesubcutaneous
0.000850743	GO_CELLULAR_RESPONSE_TO_HORMONE_STIMULUS	0.0213215	adiposesubcutaneous
0.000269665	GO_REGULATION_OF_CELL_MORPHOGENESIS_INVOLVED_IN_DIFFERENTIATION	0.0213613	nervetibial
0.000825873	GO_MESONEPHROS_DEVELOPMENT	0.0215189	arterytibial
0.000829514	GO_SECRETION_BY_CELL	0.0215189	arterytibial
0.000829514	GO_RESPONSE_TO_GROWTH_FACTOR	0.0215189	arterytibial
0.00288273	GO_INTERFERON_GAMMA_PRODUCTION	0.0216375	wholeblood
0.00288273	GO_REGULATION_OF_INTERLEUKIN_13_PRODUCTION	0.0216375	wholeblood
0.00288273	GO_POSITIVE_REGULATION_OF_DNA_RECOMBINATION	0.0216375	wholeblood
0.000842873	GO_STEM_CELL_DIFFERENTIATION	0.0217383	arterytibial
0.000877178	GO_ENDOCYTOSIS	0.0218605	adiposesubcutaneous
0.000858623	GO_MESENCHYME_DEVELOPMENT	0.0220165	arterytibial
0.000188952	GO_NEGATIVE_REGULATION_OF_EPIDERMIS_DEVELOPMENT	0.0220577	skinnotsunexposedsuprapubic
0.00132652	GO_VACUOLE_ORGANIZATION	0.022122	muscleskeletal
0.000870292	GO_NEGATIVE_REGULATION_OF_OSTEOBLAST_DIFFERENTIATION	0.0221874	arterytibial
0.00087666	GO_TRANSFORMING_GROWTH_FACTOR_BETA_RECEPTOR_SIGNALING_PATHWAY	0.0222221	arterytibial
0.00133895	GO_POSITIVE_REGULATION_OF_ORGANELLE_ORGANIZATION	0.0222456	muscleskeletal
0.000351132	GO_SPROUTING_ANGIOGENESIS	0.0222517	lung
0.000905044	GO_REGULATION_OF_URINE_VOLUME	0.0223043	adiposesubcutaneous
0.000905044	GO_RENAL_SYSTEM_VASCULATURE_DEVELOPMENT	0.0223043	adiposesubcutaneous
0.00298699	GO_NECROTIC_CELL_DEATH	0.0223445	wholeblood
0.00298699	GO_NEGATIVE_REGULATION_OF_T_CELL_DIFFERENTIATION	0.0223445	wholeblood
0.00135647	GO_REGULATION_OF_PROTEIN_COMPLEX_ASSEMBLY	0.0224526	muscleskeletal
0.000893232	GO_REGULATION_OF_CARTILAGE_DEVELOPMENT	0.0225135	arterytibial
0.000901841	GO_NEGATIVE_REGULATION_OF_INTRACELLULAR_TRANSPORT	0.0226021	arterytibial
0.000930556	GO_REGULATION_OF_RESPONSE_TO_WOUNDING	0.0227009	adiposesubcutaneous
0.000931372	GO_CELLULAR_RESPONSE_TO_ORGANIC_SUBSTANCE	0.0227009	adiposesubcutaneous
0.000916849	GO_AORTA_DEVELOPMENT	0.0227052	arterytibial
0.000921312	GO_HIPPO_SIGNALING	0.0227052	arterytibial
0.000921312	GO_POSITIVE_REGULATION_OF_CARDIAC_MUSCLE_TISSUE_DEVELOPMENT	0.0227052	arterytibial
0.00305151	GO_VESICLE_COATING	0.0227512	wholeblood
0.00305161	GO_MOVEMENT_IN_ENVIRONMENT_OF_OTHER_ORGANISM_INVOLVED_IN_SYMBIOTIC_INTERACTION	0.0227512	wholeblood
0.00305903	GO_POSITIVE_REGULATION_OF_PHAGOCYTOSIS	0.0227682	wholeblood
0.0014013	GO_RIBONUCLEOPROTEIN_COMPLEX_SUBUNIT_ORGANIZATION	0.0231085	muscleskeletal
0.000298173	GO_NEURONAL_ION_CHANNEL_CLUSTERING	0.0232052	nervetibial
0.000947345	GO_POSITIVE_REGULATION_OF_MULTICELLULAR_ORGANISMAL_PROCESS	0.0232178	arterytibial
0.00095984	GO_LONG_CHAIN_FATTY_ACID_METABOLIC_PROCESS	0.0232669	adiposesubcutaneous
0.000955216	GO_TUBE_MORPHOGENESIS	0.0232821	arterytibial
0.000969918	GO_CARTILAGE_DEVELOPMENT	0.023355	adiposesubcutaneous
0.000979268	GO_RIBONUCLEOTIDE_CATABOLIC_PROCESS	0.023355	adiposesubcutaneous
0.000979268	GO_BROWN_FAT_CELL_DIFFERENTIATION	0.023355	adiposesubcutaneous
0.000456773	GO_POSITIVE_REGULATION_OF_NUCLEAR_DIVISION	0.0234674	esophagusmucosa
0.000460249	GO_REGULATION_OF_VENTRICULAR_CARDIAC_MUSCLE_CELL_ACTION_POTENTIAL	0.0234674	esophagusmucosa
0.000377823	GO_POSITIVE_REGULATION_OF_CELL_DIFFERENTIATION	0.0235357	lung
0.000382004	GO_MESENCHYMAL_CELL_DIFFERENTIATION	0.0235357	lung
0.00143646	GO_NEGATIVE_REGULATION_OF_INTRINSIC_APOPTOTIC_SIGNALING_PATHWAY	0.0236006	muscleskeletal
0.000266616	GO_FATTY_ACID_ELONGATION	0.0236542	skinsunexposedlowerleg
0.000975945	GO_REGULATION_OF_CELL_JUNCTION_ASSEMBLY	0.0236573	arterytibial
0.00320261	GO_REGULATION_OF_BINDING	0.023797	wholeblood
0.00100442	GO_STEROL_HOMEOSTASIS	0.0238268	adiposesubcutaneous
0.00099231	GO_ACTIN_FILAMENT_ORGANIZATION	0.0239233	arterytibial
0.00324318	GO_DEPHOSPHORYLATION	0.0240581	wholeblood
0.00147978	GO_STEROID_HORMONE_MEDIATED_SIGNALING_PATHWAY	0.0241462	muscleskeletal
0.00148056	GO_POSITIVE_REGULATION_OF_GENE_EXPRESSION	0.0241462	muscleskeletal
0.00326066	GO_REGULATION_OF_STRESS_ACTIVATED_PROTEIN_KINASE_SIGNALING_CASCADE	0.0241474	wholeblood
0.00102706	GO_EAR_MORPHOGENESIS	0.0242343	adiposesubcutaneous
0.000482212	GO_CELL_CYCLE_G2_M_PHASE_TRANSITION	0.0243079	esophagusmucosa
0.0010227	GO_MODULATION_OF_SYNAPTIC_TRANSMISSION	0.0245226	arterytibial
0.00331983	GO_POSITIVE_REGULATION_OF_MAP_KINASE_ACTIVITY	0.0245446	wholeblood
0.00104937	GO_REGULATION_OF_VASOCONSTRICTION	0.0246296	adiposesubcutaneous
0.00151804	GO_CARDIAC_CELL_DEVELOPMENT	0.0246667	muscleskeletal
0.000283632	GO_FOREBRAIN_DEVELOPMENT	0.0246705	skinsunexposedlowerleg
0.000568673	GO_RIBOSOMAL_SMALL_SUBUNIT_BIOGENESIS	0.0246949	skins
0.000573394	GO_SISTER_CHROMATID_SEGREGATION	0.0246949	skins
0.000217895	GO_WATER_HOMEOSTASIS	0.0247842	skinnotsunexposedsuprapubic
0.0033649	GO_REGULATION_OF_ORGANELLE_ASSEMBLY	0.0248364	wholeblood
0.00337373	GO_REGULATION_OF_SMALL_GTPASE_MEDIATED_SIGNAL_TRANSDUCTION	0.0248602	wholeblood
0.00106988	GO_EMBRYONIC_CAMERA_TYPE_EYE_DEVELOPMENT	0.0248674	adiposesubcutaneous
0.00107071	GO_REGULATION_OF_ANATOMICAL_STRUCTURE_SIZE	0.0248674	adiposesubcutaneous
0.00338536	GO_REGULATION_OF_CELL_ADHESION_MEDIATED_BY_INTEGRIN	0.0248846	wholeblood
0.00338826	GO_REGULATION_OF_PROTEIN_BINDING	0.0248846	wholeblood
0.000411709	GO_NEURON_DIFFERENTIATION	0.0249764	lung
0.000422211	GO_ANATOMICAL_STRUCTURE_FORMATION_INVOLVED_IN_MORPHOGENESIS	0.0249764	lung
0.00042228	GO_SYSTEM_PROCESS	0.0249764	lung
0.00108236	GO_TISSUE_MIGRATION	0.0250071	adiposesubcutaneous
0.000431092	GO_SYNAPSE_ORGANIZATION	0.0250449	lung
0.000446366	GO_REGULATION_OF_TRANSPORT	0.0250449	lung
0.000455367	GO_POSITIVE_REGULATION_OF_CARDIAC_MUSCLE_TISSUE_DEVELOPMENT	0.0250449	lung
0.000455367	GO_T_CELL_MEDIATED_IMMUNITY	0.0250449	lung
0.000457005	GO_POSITIVE_REGULATION_OF_CELL_ADHESION	0.0250449	lung
0.000457312	GO_POSITIVE_REGULATION_OF_CARDIAC_MUSCLE_CELL_PROLIFERATION	0.0250449	lung
0.00342173	GO_RESPONSE_TO_NITROGEN_COMPOUND	0.0250889	wholeblood
0.000465952	GO_REGULATION_OF_BLOOD_PRESSURE	0.0252069	lung
0.0002956	GO_PATTERN_SPECIFICATION_PROCESS	0.025217	skinsunexposedlowerleg
0.00345762	GO_CELLULAR_RESPONSE_TO_INTERLEUKIN_4	0.025227	wholeblood
0.00345762	GO_REGULATION_OF_NATURAL_KILLER_CELL_ACTIVATION	0.025227	wholeblood
0.00345762	GO_PHAGOSOME_ACIDIFICATION	0.025227	wholeblood
0.00346774	GO_REGULATION_OF_CELLULAR_COMPONENT_SIZE	0.0252593	wholeblood
0.00156226	GO_HEART_DEVELOPMENT	0.0252926	muscleskeletal
0.000474749	GO_EYE_DEVELOPMENT	0.0253733	lung
0.000484285	GO_PHOSPHOLIPASE_C_ACTIVATING_G_PROTEIN_COUPLED_RECEPTOR_SIGNALING_PATHWAY	0.0254029	lung
0.000486756	GO_INTERACTION_WITH_HOST	0.0254029	lung
0.00049813	GO_RESPIRATORY_SYSTEM_DEVELOPMENT	0.0256942	lung
0.00159363	GO_PROTEIN_FOLDING	0.0257067	muscleskeletal
0.00354063	GO_NEGATIVE_REGULATION_OF_MULTICELLULAR_ORGANISMAL_PROCESS	0.0257147	wholeblood
0.00354186	GO_REGULATION_OF_MONOOXYGENASE_ACTIVITY	0.0257147	wholeblood
0.000506379	GO_EPITHELIUM_DEVELOPMENT	0.0258195	lung
0.00357171	GO_SOMATIC_CELL_DNA_RECOMBINATION	0.0258469	wholeblood
0.00357171	GO_REGULATION_OF_LAMELLIPODIUM_ORGANIZATION	0.0258469	wholeblood
0.00108556	GO_VASCULAR_ENDOTHELIAL_GROWTH_FACTOR_RECEPTOR_SIGNALING_PATHWAY	0.02589	arterytibial
0.000310114	GO_NEGATIVE_REGULATION_OF_EPIDERMAL_CELL_DIFFERENTIATION	0.025956	skinsunexposedlowerleg
0.00023406	GO_CERAMIDE_BIOSYNTHETIC_PROCESS	0.0259573	skinnotsunexposedsuprapubic
0.00110014	GO_EYE_DEVELOPMENT	0.025993	arterytibial
0.0011016	GO_POSITIVE_REGULATION_OF_OSTEOBLAST_DIFFERENTIATION	0.025993	arterytibial
0.00113167	GO_COFACTOR_METABOLIC_PROCESS	0.0260108	adiposesubcutaneous
0.00024066	GO_LIPID_METABOLIC_PROCESS	0.0260383	skinnotsunexposedsuprapubic
0.00162091	GO_NAD_METABOLIC_PROCESS	0.026052	muscleskeletal
0.00363703	GO_REGULATION_OF_PH	0.0262433	wholeblood
0.00363833	GO_REGULATION_OF_RNA_STABILITY	0.0262433	wholeblood
0.000526895	GO_GLANDULAR_EPITHELIAL_CELL_DIFFERENTIATION	0.0265603	lung
0.00117056	GO_NEGATIVE_REGULATION_OF_LOCOMOTION	0.0266287	adiposesubcutaneous
0.00117056	GO_COENZYME_METABOLIC_PROCESS	0.0266287	adiposesubcutaneous
0.00113523	GO_REGULATION_OF_CARDIAC_MUSCLE_CONTRACTION_BY_REGULATION_OF_THE_RELEASE_OF_SEQUESTERED_CALCIUM_ION	0.0266448	arterytibial
0.00370808	GO_POSITIVE_REGULATION_OF_CELLULAR_COMPONENT_BIOGENESIS	0.0266709	wholeblood
0.00370964	GO_NEGATIVE_REGULATION_OF_PROTEIN_BINDING	0.0266709	wholeblood
0.00114504	GO_MESENCHYME_MORPHOGENESIS	0.0267337	arterytibial
0.00168964	GO_NEGATIVE_REGULATION_OF_RNA_SPLICING	0.0269672	muscleskeletal
0.00169001	GO_PROTEIN_DEPHOSPHORYLATION	0.0269672	muscleskeletal
0.00376344	GO_REGULATION_OF_RAS_PROTEIN_SIGNAL_TRANSDUCTION	0.0270139	wholeblood
0.00378081	GO_DNA_CONFORMATION_CHANGE	0.0270948	wholeblood
0.00116752	GO_EMBRYONIC_ORGAN_MORPHOGENESIS	0.027115	arterytibial
0.00117659	GO_POSITIVE_REGULATION_OF_AXONOGENESIS	0.027115	arterytibial
0.00117971	GO_REGULATION_OF_CHONDROCYTE_DIFFERENTIATION	0.027115	arterytibial
0.00379461	GO_REGULATION_OF_PEPTIDASE_ACTIVITY	0.0271499	wholeblood
0.0012114	GO_RESPONSE_TO_GROWTH_FACTOR	0.0272173	adiposesubcutaneous
0.00122683	GO_NEGATIVE_REGULATION_OF_SECRETION	0.0272173	adiposesubcutaneous
0.00122943	GO_POSITIVE_REGULATION_OF_HYDROLASE_ACTIVITY	0.0272173	adiposesubcutaneous
0.00123097	GO_POSITIVE_REGULATION_OF_CELL_DIFFERENTIATION	0.0272173	adiposesubcutaneous
0.00123569	GO_REGULATION_OF_PROTEIN_MODIFICATION_PROCESS	0.0272173	adiposesubcutaneous
0.00123716	GO_LIPID_MODIFICATION	0.0272173	adiposesubcutaneous
0.00123938	GO_POSITIVE_REGULATION_OF_CATALYTIC_ACTIVITY	0.0272173	adiposesubcutaneous
0.00127372	GO_RESPONSE_TO_FATTY_ACID	0.0278337	adiposesubcutaneous
0.00175558	GO_POSITIVE_REGULATION_OF_MUSCLE_CELL_DIFFERENTIATION	0.0279131	muscleskeletal
0.00392709	GO_MACROMOLECULE_CATABOLIC_PROCESS	0.0280524	wholeblood
0.00395092	GO_DISRUPTION_OF_CELLS_OF_OTHER_ORGANISM	0.028087	wholeblood
0.00395092	GO_REGULATION_OF_SYNCYTIUM_FORMATION_BY_PLASMA_MEMBRANE_FUSION	0.028087	wholeblood
0.00395092	GO_LEUKOCYTE_APOPTOTIC_PROCESS	0.028087	wholeblood
0.00129888	GO_CHEMICAL_HOMEOSTASIS	0.0280901	adiposesubcutaneous
0.00130145	GO_CELL_PROLIFERATION	0.0280901	adiposesubcutaneous
0.00131493	GO_REGULATION_OF_CELL_MATRIX_ADHESION	0.0280901	adiposesubcutaneous
0.00132326	GO_POSITIVE_REGULATION_OF_LIPID_TRANSPORT	0.0280901	adiposesubcutaneous
0.00132326	GO_REGULATION_OF_SMOOTH_MUSCLE_CELL_MIGRATION	0.0280901	adiposesubcutaneous
0.00133648	GO_NEURON_MATURATION	0.0280901	adiposesubcutaneous
0.00134087	GO_CELL_MATURATION	0.0280901	adiposesubcutaneous
0.00134193	GO_TERPENOID_METABOLIC_PROCESS	0.0280901	adiposesubcutaneous
0.00134245	GO_TISSUE_DEVELOPMENT	0.0280901	adiposesubcutaneous
0.00396286	GO_PROTEIN_K48_LINKED_UBIQUITINATION	0.0281268	wholeblood
0.00135173	GO_REGULATION_OF_MEMBRANE_PROTEIN_ECTODOMAIN_PROTEOLYSIS	0.0281516	adiposesubcutaneous
0.00397847	GO_REGULATION_OF_CYTOSKELETON_ORGANIZATION	0.0281925	wholeblood
0.00136038	GO_NEGATIVE_REGULATION_OF_DEVELOPMENTAL_PROCESS	0.0281993	adiposesubcutaneous
0.0017879	GO_POSITIVE_REGULATION_OF_SODIUM_ION_TRANSPORT	0.0282653	muscleskeletal
0.00179048	GO_REGULATION_OF_ATPASE_ACTIVITY	0.0282653	muscleskeletal
0.000669091	GO_RNA_DEPENDENT_DNA_BIOSYNTHETIC_PROCESS	0.0282675	skins
0.000669091	GO_FORMATION_OF_TRANSLATION_PREINITIATION_COMPLEX	0.0282675	skins
0.00124351	GO_AMINOGLYCAN_METABOLIC_PROCESS	0.0284341	arterytibial
0.00139249	GO_REGULATION_OF_SEQUESTERING_OF_TRIGLYCERIDE	0.0284658	adiposesubcutaneous
0.00139249	GO_CELL_MIGRATION_INVOLVED_IN_GASTRULATION	0.0284658	adiposesubcutaneous
0.00139249	GO_HEART_TRABECULA_FORMATION	0.0284658	adiposesubcutaneous
0.00181256	GO_REGULATION_OF_MEMBRANE_PERMEABILITY	0.0285124	muscleskeletal
0.00141303	GO_WNT_SIGNALING_PATHWAY_CALCIUM_MODULATING_PATHWAY	0.028622	adiposesubcutaneous
0.00141303	GO_RESPONSE_TO_PROSTAGLANDIN	0.028622	adiposesubcutaneous
0.00405474	GO_INTRACELLULAR_PROTEIN_TRANSPORT	0.0286871	wholeblood
0.00407174	GO_NEGATIVE_REGULATION_OF_LYMPHOCYTE_DIFFERENTIATION	0.0287615	wholeblood
0.00126586	GO_RESPONSE_TO_ENDOGENOUS_STIMULUS	0.0287968	arterytibial
0.00127616	GO_NEUROBLAST_PROLIFERATION	0.028883	arterytibial
0.000354595	GO_EYE_DEVELOPMENT	0.0291293	skinsunexposedlowerleg
0.000587496	GO_ION_TRANSMEMBRANE_TRANSPORT	0.0292824	lung
0.00146048	GO_CAMP_BIOSYNTHETIC_PROCESS	0.0293154	adiposesubcutaneous
0.00146048	GO_BRANCHING_INVOLVED_IN_SALIVARY_GLAND_MORPHOGENESIS	0.0293154	adiposesubcutaneous
0.00416659	GO_REGULATION_OF_MYELOID_LEUKOCYTE_DIFFERENTIATION	0.0293847	wholeblood
0.000603285	GO_REGULATION_OF_SMALL_GTPASE_MEDIATED_SIGNAL_TRANSDUCTION	0.0294193	lung
0.000610139	GO_REGULATION_OF_G_PROTEIN_COUPLED_RECEPTOR_PROTEIN_SIGNALING_PATHWAY	0.0294193	lung
0.000610139	GO_RETINA_DEVELOPMENT_IN_CAMERA_TYPE_EYE	0.0294193	lung
0.0042259	GO_REGULATION_OF_EXTRINSIC_APOPTOTIC_SIGNALING_PATHWAY	0.029712	wholeblood
0.00423117	GO_REGULATION_OF_INTERLEUKIN_4_PRODUCTION	0.029712	wholeblood
0.00423309	GO_NEGATIVE_REGULATION_OF_PHOSPHORYLATION	0.029712	wholeblood
0.00424633	GO_REGULATION_OF_PROTEIN_CATABOLIC_PROCESS	0.0297579	wholeblood
0.00132706	GO_NEGATIVE_REGULATION_OF_LOCOMOTION	0.0297632	arterytibial
0.00132847	GO_MUSCLE_ORGAN_DEVELOPMENT	0.0297632	arterytibial
0.00425951	GO_SIGNAL_TRANSDUCTION_IN_RESPONSE_TO_DNA_DAMAGE	0.0298032	wholeblood
0.00190145	GO_PROTEIN_TETRAMERIZATION	0.0298051	muscleskeletal
0.00191607	GO_REGULATION_OF_TRANSPORTER_ACTIVITY	0.0299285	muscleskeletal
0.00150104	GO_BONE_DEVELOPMENT	0.0299938	adiposesubcutaneous
0.00134867	GO_POSITIVE_REGULATION_OF_CELL_COMMUNICATION	0.0300639	arterytibial
0.0019317	GO_REGULATION_OF_INTRACELLULAR_TRANSPORT	0.0300668	muscleskeletal
0.000719027	GO_MISMATCH_REPAIR	0.0300906	skins
0.00431689	GO_REGULATION_OF_OSTEOCLAST_DIFFERENTIATION	0.030157	wholeblood
0.00039503	GO_SPINAL_CORD_DEVELOPMENT	0.030213	nervetibial
0.00151929	GO_ENDOTHELIAL_CELL_MIGRATION	0.0302223	adiposesubcutaneous
0.000402676	GO_TAXIS	0.0302758	nervetibial
0.00063591	GO_REGULATION_OF_NEURON_DIFFERENTIATION	0.0303322	lung
0.000649624	GO_REGULATION_OF_EXTRINSIC_APOPTOTIC_SIGNALING_PATHWAY_VIA_DEATH_DOMAIN_RECEPTORS	0.030334	lung
0.000649624	GO_VENTRICULAR_SEPTUM_DEVELOPMENT	0.030334	lung
0.00197973	GO_DEPHOSPHORYLATION	0.0307066	muscleskeletal
0.000617103	GO_NEGATIVE_REGULATION_OF_PROTEIN_COMPLEX_DISASSEMBLY	0.0307581	esophagusmucosa
0.00441132	GO_REGULATION_OF_CHROMATIN_ORGANIZATION	0.0307682	wholeblood
0.00442891	GO_REGULATION_OF_T_CELL_CYTOKINE_PRODUCTION	0.0308425	wholeblood
0.00155846	GO_REGULATION_OF_GTPASE_ACTIVITY	0.0308631	adiposesubcutaneous
0.000293715	GO_ANTERIOR_POSTERIOR_PATTERN_SPECIFICATION	0.0310219	skinnotsunexposedsuprapubic
0.00447212	GO_CELLULAR_RESPONSE_TO_MECHANICAL_STIMULUS	0.0310946	wholeblood
0.00448567	GO_REGULATION_OF_NIK_NF_KAPPAB_SIGNALING	0.031135	wholeblood
0.00449198	GO_GLYCOSPHINGOLIPID_METABOLIC_PROCESS	0.031135	wholeblood
0.000421678	GO_REGULATION_OF_NEUROTRANSMITTER_LEVELS	0.031176	nervetibial
0.00451219	GO_POSITIVE_REGULATION_OF_AUTOPHAGY	0.0312263	wholeblood
0.000307602	GO_SENSORY_ORGAN_DEVELOPMENT	0.0312467	skinnotsunexposedsuprapubic
0.000309931	GO_REGULATION_OF_CELL_PROJECTION_ORGANIZATION	0.0312467	skinnotsunexposedsuprapubic
0.000688253	GO_POSITIVE_REGULATION_OF_CELL_COMMUNICATION	0.0315264	lung
0.000689374	GO_ATRIOVENTRICULAR_VALVE_DEVELOPMENT	0.0315264	lung
0.000392252	GO_PALLIUM_DEVELOPMENT	0.0316369	skinsunexposedlowerleg
0.000770641	GO_RIBOSOMAL_LARGE_SUBUNIT_BIOGENESIS	0.0319492	skins
0.00145546	GO_NOTCH_SIGNALING_PATHWAY	0.0322822	arterytibial
0.00164001	GO_VERY_LONG_CHAIN_FATTY_ACID_METABOLIC_PROCESS	0.0323337	adiposesubcutaneous
0.00164814	GO_REGULATION_OF_BODY_FLUID_LEVELS	0.0323502	adiposesubcutaneous
0.000445386	GO_CELL_CELL_SIGNALING	0.0323891	nervetibial
0.000789576	GO_MRNA_3_END_PROCESSING	0.0324311	skins
0.00211802	GO_REGULATION_OF_INTRINSIC_APOPTOTIC_SIGNALING_PATHWAY	0.0325401	muscleskeletal
0.00211995	GO_NEGATIVE_REGULATION_OF_NUCLEOSIDE_METABOLIC_PROCESS	0.0325401	muscleskeletal
0.00211995	GO_METALLO_SULFUR_CLUSTER_ASSEMBLY	0.0325401	muscleskeletal
0.00213358	GO_REGULATION_OF_HEART_RATE	0.0325443	muscleskeletal
0.00213489	GO_MUSCLE_HYPERTROPHY	0.0325443	muscleskeletal
0.00471187	GO_CELL_CYCLE	0.0325574	wholeblood
0.00148794	GO_REGULATION_OF_CATECHOLAMINE_SECRETION	0.0326758	arterytibial
0.00148794	GO_ENDODERMAL_CELL_DIFFERENTIATION	0.0326758	arterytibial
0.00167742	GO_RESPONSE_TO_CARBOHYDRATE	0.0327799	adiposesubcutaneous
0.000458261	GO_G_PROTEIN_COUPLED_RECEPTOR_SIGNALING_PATHWAY	0.0327878	nervetibial
0.000725265	GO_POSITIVE_REGULATION_OF_CELL_DEVELOPMENT	0.0328294	lung
0.00169182	GO_BONE_MORPHOGENESIS	0.0329164	adiposesubcutaneous
0.00478353	GO_NEGATIVE_REGULATION_OF_PROTEIN_MODIFICATION_PROCESS	0.0329853	wholeblood
0.00481841	GO_NEGATIVE_REGULATION_OF_INTERLEUKIN_1_PRODUCTION	0.0329853	wholeblood
0.00481841	GO_NEGATIVE_REGULATION_OF_T_CELL_APOPTOTIC_PROCESS	0.0329853	wholeblood
0.00481841	GO_POSITIVE_REGULATION_OF_ANTIGEN_PROCESSING_AND_PRESENTATION	0.0329853	wholeblood
0.00481841	GO_NEGATIVE_REGULATION_OF_GLUCOSE_TRANSPORT	0.0329853	wholeblood
0.00481841	GO_CYTOKINE_PRODUCTION_INVOLVED_IN_IMMUNE_RESPONSE	0.0329853	wholeblood
0.00217989	GO_RESPONSE_TO_INACTIVITY	0.0330034	muscleskeletal
0.00217989	GO_UBIQUINONE_METABOLIC_PROCESS	0.0330034	muscleskeletal
0.00486064	GO_CELLULAR_RESPONSE_TO_ABIOTIC_STIMULUS	0.0332231	wholeblood
0.000742379	GO_NEUROLOGICAL_SYSTEM_PROCESS	0.0332646	lung
0.0048836	GO_NEGATIVE_REGULATION_OF_TRANSPORT	0.0333171	wholeblood
0.00488942	GO_NEGATIVE_REGULATION_OF_INTERFERON_GAMMA_PRODUCTION	0.0333171	wholeblood
0.00152881	GO_REGULATION_OF_VASOCONSTRICTION	0.033408	arterytibial
0.00223651	GO_REGULATION_OF_SKELETAL_MUSCLE_CELL_DIFFERENTIATION	0.0335175	muscleskeletal
0.00223651	GO_CYTOCHROME_COMPLEX_ASSEMBLY	0.0335175	muscleskeletal
0.00223651	GO_REGULATION_OF_RESPONSE_TO_FOOD	0.0335175	muscleskeletal
0.000483625	GO_BIOLOGICAL_ADHESION	0.0335393	nervetibial
0.000483885	GO_SENSORY_PERCEPTION	0.0335393	nervetibial
0.000825782	GO_SPLICEOSOMAL_SNRNP_ASSEMBLY	0.033607	skins
0.000431736	GO_POSITIVE_REGULATION_OF_OSTEOBLAST_DIFFERENTIATION	0.0336088	skinsunexposedlowerleg
0.000431853	GO_CAMERA_TYPE_EYE_MORPHOGENESIS	0.0336088	skinsunexposedlowerleg
0.000834975	GO_CHROMATIN_ORGANIZATION	0.0336723	skins
0.00498513	GO_BARBED_END_ACTIN_FILAMENT_CAPPING	0.0337104	wholeblood
0.00498513	GO_POSITIVE_REGULATION_OF_ENDOPLASMIC_RETICULUM_UNFOLDED_PROTEIN_RESPONSE	0.0337104	wholeblood
0.00498513	GO_NEGATIVE_T_CELL_SELECTION	0.0337104	wholeblood
0.00498513	GO_ACTIVATION_OF_CYSTEINE_TYPE_ENDOPEPTIDASE_ACTIVITY_INVOLVED_IN_APOPTOTIC_SIGNALING_PATHWAY	0.0337104	wholeblood
0.00498513	GO_CELLULAR_RESPONSE_TO_INTERFERON_BETA	0.0337104	wholeblood
0.0017426	GO_RESPONSE_TO_GLUCAGON	0.0337563	adiposesubcutaneous
0.00175062	GO_POSITIVE_REGULATION_OF_CELL_PROLIFERATION	0.0337641	adiposesubcutaneous
0.00506234	GO_MOVEMENT_OF_CELL_OR_SUBCELLULAR_COMPONENT	0.0341804	wholeblood
0.00507516	GO_ACTIVATION_OF_MAPKK_ACTIVITY	0.0342149	wholeblood
0.00157928	GO_NEGATIVE_REGULATION_OF_NERVOUS_SYSTEM_DEVELOPMENT	0.0343417	arterytibial
0.00230025	GO_AUTOPHAGOSOME_ORGANIZATION	0.0343566	muscleskeletal
0.0006982	GO_DNA_INTEGRITY_CHECKPOINT	0.0344135	esophagusmucosa
0.000710276	GO_NEGATIVE_REGULATION_OF_CELL_CYCLE_G1_S_PHASE_TRANSITION	0.0345506	esophagusmucosa
0.00071656	GO_POSITIVE_REGULATION_OF_MITOTIC_NUCLEAR_DIVISION	0.0345506	esophagusmucosa
0.000351334	GO_NEGATIVE_REGULATION_OF_EPIDERMAL_CELL_DIFFERENTIATION	0.0346337	skinnotsunexposedsuprapubic
0.00181629	GO_REGULATION_OF_LIPID_STORAGE	0.0347287	adiposesubcutaneous
0.00181629	GO_ENDOCRINE_PROCESS	0.0347287	adiposesubcutaneous
0.00519273	GO_REGULATION_OF_ACTIN_FILAMENT_BASED_PROCESS	0.0349544	wholeblood
0.000733794	GO_SMALL_MOLECULE_METABOLIC_PROCESS	0.0350012	esophagusmucosa
0.000789502	GO_REGULATION_OF_EPITHELIAL_CELL_APOPTOTIC_PROCESS	0.0350223	lung
0.00184135	GO_CELLULAR_RESPONSE_TO_GLUCAGON_STIMULUS	0.0350568	adiposesubcutaneous
0.00525609	GO_RAS_PROTEIN_SIGNAL_TRANSDUCTION	0.0352992	wholeblood
0.00526782	GO_REGULATION_OF_COAGULATION	0.0352992	wholeblood
0.00526782	GO_REGULATION_OF_OXIDOREDUCTASE_ACTIVITY	0.0352992	wholeblood
0.0023771	GO_REGULATION_OF_CYTOPLASMIC_TRANSPORT	0.0353853	muscleskeletal
0.00530268	GO_CELLULAR_RESPONSE_TO_EXTERNAL_STIMULUS	0.0354792	wholeblood
0.0053612	GO_REGULATION_OF_LIPASE_ACTIVITY	0.0357628	wholeblood
0.0053612	GO_INTEGRIN_MEDIATED_SIGNALING_PATHWAY	0.0357628	wholeblood
0.0016667	GO_CARDIAC_LEFT_VENTRICLE_MORPHOGENESIS	0.0358906	arterytibial
0.0016667	GO_CELL_ADHESION_MEDIATED_BY_INTEGRIN	0.0358906	arterytibial
0.00242251	GO_POSITIVE_REGULATION_OF_CATION_TRANSMEMBRANE_TRANSPORT	0.0359406	muscleskeletal
0.000472785	GO_EMBRYONIC_CAMERA_TYPE_EYE_DEVELOPMENT	0.0361599	skinsunexposedlowerleg
0.0016889	GO_REGULATION_OF_SYNAPTIC_VESICLE_EXOCYTOSIS	0.0361931	arterytibial
0.00191155	GO_REGULATION_OF_ACTIN_FILAMENT_BUNDLE_ASSEMBLY	0.0362378	adiposesubcutaneous
0.00545744	GO_PROTEIN_OLIGOMERIZATION	0.0363502	wholeblood
0.000796971	GO_PEPTIDE_CROSS_LINKING	0.036392	esophagusmucosa
0.000813183	GO_RESPONSE_TO_ALCOHOL	0.036392	esophagusmucosa
0.000824896	GO_DNA_STRAND_ELONGATION_INVOLVED_IN_DNA_REPLICATION	0.036392	esophagusmucosa
0.000824896	GO_NEGATIVE_REGULATION_OF_CHROMOSOME_SEGREGATION	0.036392	esophagusmucosa
0.000836065	GO_KERATINOCYTE_PROLIFERATION	0.036392	esophagusmucosa
0.000836065	GO_TROPHOBLAST_GIANT_CELL_DIFFERENTIATION	0.036392	esophagusmucosa
0.000836065	GO_PROTEIN_AUTOPROCESSING	0.036392	esophagusmucosa
0.000836787	GO_DRUG_METABOLIC_PROCESS	0.036392	esophagusmucosa
0.000836787	GO_CENTROMERE_COMPLEX_ASSEMBLY	0.036392	esophagusmucosa
0.00170955	GO_REGULATION_OF_VASCULATURE_DEVELOPMENT	0.0364595	arterytibial
0.00194495	GO_REGULATION_OF_EXTRINSIC_APOPTOTIC_SIGNALING_PATHWAY	0.0364792	adiposesubcutaneous
0.00195718	GO_CRANIAL_NERVE_MORPHOGENESIS	0.0364792	adiposesubcutaneous
0.00195718	GO_TRABECULA_FORMATION	0.0364792	adiposesubcutaneous
0.00195718	GO_REGULATION_OF_SYSTEMIC_ARTERIAL_BLOOD_PRESSURE_BY_RENIN_ANGIOTENSIN	0.0364792	adiposesubcutaneous
0.00248178	GO_NEGATIVE_REGULATION_OF_ACTIN_FILAMENT_POLYMERIZATION	0.0366973	muscleskeletal
0.00249209	GO_CARBOHYDRATE_DERIVATIVE_METABOLIC_PROCESS	0.0367272	muscleskeletal
0.00173476	GO_STEM_CELL_DIVISION	0.0368201	arterytibial
0.000855969	GO_EPITHELIAL_CELL_PROLIFERATION	0.0368648	esophagusmucosa
0.000936024	GO_CELLULAR_MACROMOLECULE_LOCALIZATION	0.0374072	skins
0.00177881	GO_REGULATION_OF_NUCLEOCYTOPLASMIC_TRANSPORT	0.0375753	arterytibial
0.000948961	GO_COVALENT_CHROMATIN_MODIFICATION	0.0375856	skins
0.0025639	GO_ACTIVATION_OF_INNATE_IMMUNE_RESPONSE	0.0376604	muscleskeletal
0.000560188	GO_SYNAPTIC_SIGNALING	0.0376808	nervetibial
0.000560626	GO_POSITIVE_REGULATION_OF_NEURON_PROJECTION_DEVELOPMENT	0.0376808	nervetibial
0.0025789	GO_REGULATION_OF_CATION_CHANNEL_ACTIVITY	0.0377557	muscleskeletal
0.000861224	GO_REGULATION_OF_ANATOMICAL_STRUCTURE_SIZE	0.0378256	lung
0.0025975	GO_INTRACELLULAR_RECEPTOR_SIGNALING_PATHWAY	0.0379029	muscleskeletal
0.0018035	GO_CELL_PROLIFERATION	0.0379162	arterytibial
0.00261603	GO_SIGNAL_TRANSDUCTION_BY_PROTEIN_PHOSPHORYLATION	0.0380482	muscleskeletal
0.00183285	GO_HEMOSTASIS	0.0383515	arterytibial
0.000901304	GO_DNA_RECOMBINATION	0.0384441	esophagusmucosa
0.00186526	GO_POSITIVE_REGULATION_OF_VASOCONSTRICTION	0.038665	arterytibial
0.00186526	GO_REGULATION_OF_MESENCHYMAL_CELL_PROLIFERATION	0.038665	arterytibial
0.00187762	GO_PROTEIN_HOMOOLIGOMERIZATION	0.0387401	arterytibial
0.00209238	GO_CELLULAR_RESPONSE_TO_NITROGEN_COMPOUND	0.0388359	adiposesubcutaneous
0.00585807	GO_RESPONSE_TO_INTERLEUKIN_4	0.0389601	wholeblood
0.00270976	GO_REGULATION_OF_CANONICAL_WNT_SIGNALING_PATHWAY	0.0392826	muscleskeletal
0.00101267	GO_LOOP_OF_HENLE_DEVELOPMENT	0.0394055	skins
0.00101267	GO_REGULATION_OF_MRNA_POLYADENYLATION	0.0394055	skins
0.000915079	GO_POSITIVE_REGULATION_OF_BLOOD_CIRCULATION	0.0394511	lung
0.000916019	GO_DIVALENT_INORGANIC_CATION_TRANSPORT	0.0394511	lung
0.0027329	GO_NEGATIVE_REGULATION_OF_CATABOLIC_PROCESS	0.0394891	muscleskeletal
0.00192377	GO_REGULATION_OF_HEART_RATE	0.0395086	arterytibial
0.000927712	GO_CARDIAC_SEPTUM_DEVELOPMENT	0.0395705	lung
0.00600638	GO_NEGATIVE_REGULATION_OF_CATABOLIC_PROCESS	0.0398867	wholeblood
0.00103509	GO_NEGATIVE_REGULATION_OF_EPIDERMAL_CELL_DIFFERENTIATION	0.0399274	skins
0.0027751	GO_TRNA_METABOLIC_PROCESS	0.0399687	muscleskeletal
0.00216786	GO_GLOMERULUS_DEVELOPMENT	0.0400693	adiposesubcutaneous
0.00280571	GO_MRNA_METABOLIC_PROCESS	0.0402787	muscleskeletal
0.00221792	GO_CELL_SUBSTRATE_ADHESION	0.040495	adiposesubcutaneous
0.00222893	GO_ORGAN_MATURATION	0.040495	adiposesubcutaneous
0.00222893	GO_ADRENERGIC_RECEPTOR_SIGNALING_PATHWAY	0.040495	adiposesubcutaneous
0.00222893	GO_FOLIC_ACID_METABOLIC_PROCESS	0.040495	adiposesubcutaneous
0.00224566	GO_ACYLGLYCEROL_HOMEOSTASIS	0.040495	adiposesubcutaneous
0.00224566	GO_REPRODUCTIVE_BEHAVIOR	0.040495	adiposesubcutaneous
0.0028446	GO_ION_TRANSMEMBRANE_TRANSPORT	0.0405523	muscleskeletal
0.00284878	GO_REGULATION_OF_AUTOPHAGY	0.0405523	muscleskeletal
0.00285219	GO_POSITIVE_REGULATION_OF_BIOSYNTHETIC_PROCESS	0.0405523	muscleskeletal
0.00198813	GO_NEGATIVE_REGULATION_OF_OSSIFICATION	0.0406421	arterytibial
0.00286937	GO_GLYCOSYL_COMPOUND_BIOSYNTHETIC_PROCESS	0.0406663	muscleskeletal
0.00200347	GO_EAR_DEVELOPMENT	0.0407093	arterytibial
0.00200977	GO_NEPHRON_EPITHELIUM_DEVELOPMENT	0.0407093	arterytibial
0.00618068	GO_REGULATION_OF_CHEMOTAXIS	0.0409828	wholeblood
0.000974362	GO_REGULATION_OF_NEURON_PROJECTION_DEVELOPMENT	0.0411645	lung
0.00295165	GO_ENDOPLASMIC_RETICULUM_TO_CYTOSOL_TRANSPORT	0.0413045	muscleskeletal
0.00295165	GO_ASPARTATE_FAMILY_AMINO_ACID_BIOSYNTHETIC_PROCESS	0.0413045	muscleskeletal
0.00295165	GO_POSITIVE_REGULATION_OF_MYOBLAST_DIFFERENTIATION	0.0413045	muscleskeletal
0.00295165	GO_NLS_BEARING_PROTEIN_IMPORT_INTO_NUCLEUS	0.0413045	muscleskeletal
0.00625382	GO_MYELOID_CELL_HOMEOSTASIS	0.0413442	wholeblood
0.00625382	GO_POSITIVE_REGULATION_OF_VIRAL_PROCESS	0.0413442	wholeblood
0.00098322	GO_MAMMARY_GLAND_EPITHELIUM_DEVELOPMENT	0.0415387	esophagusmucosa
0.00208463	GO_POSITIVE_REGULATION_OF_HEART_GROWTH	0.0416136	arterytibial
0.00208463	GO_CELL_PROLIFERATION_IN_FOREBRAIN	0.0416136	arterytibial
0.00208463	GO_REGULATION_OF_RELEASE_OF_SEQUESTERED_CALCIUM_ION_INTO_CYTOSOL_BY_SARCOPLASMIC_RETICULUM	0.0416136	arterytibial
0.00209194	GO_NEURAL_TUBE_DEVELOPMENT	0.0416136	arterytibial
0.00232614	GO_REGULATION_OF_BICELLULAR_TIGHT_JUNCTION_ASSEMBLY	0.0416842	adiposesubcutaneous
0.00233041	GO_SMALL_MOLECULE_BIOSYNTHETIC_PROCESS	0.0416842	adiposesubcutaneous
0.00299232	GO_POSITIVE_REGULATION_OF_TRANSCRIPTION_FROM_RNA_POLYMERASE_II_PROMOTER	0.0417419	muscleskeletal
0.00234685	GO_TELENCEPHALON_DEVELOPMENT	0.0418098	adiposesubcutaneous
0.0023672	GO_ENDOCARDIAL_CUSHION_DEVELOPMENT	0.0418802	adiposesubcutaneous
0.00236969	GO_REGULATION_OF_MEMBRANE_LIPID_DISTRIBUTION	0.0418802	adiposesubcutaneous
0.00301593	GO_SYSTEM_PROCESS	0.0419395	muscleskeletal
0.00303088	GO_NEGATIVE_REGULATION_OF_PROTEIN_MODIFICATION_PROCESS	0.0420155	muscleskeletal
0.00639226	GO_CELLULAR_RESPONSE_TO_INTERLEUKIN_1	0.0421966	wholeblood
0.00240446	GO_PLASMA_MEMBRANE_ORGANIZATION	0.0423197	adiposesubcutaneous
0.00241364	GO_ADENYLATE_CYCLASE_INHIBITING_G_PROTEIN_COUPLED_RECEPTOR_SIGNALING_PATHWAY	0.0423197	adiposesubcutaneous
0.00214904	GO_REGULATION_OF_PHOSPHATIDYLINOSITOL_3_KINASE_SIGNALING	0.0423695	arterytibial
0.00214904	GO_NEGATIVE_REGULATION_OF_CELLULAR_PROTEIN_LOCALIZATION	0.0423695	arterytibial
0.00642943	GO_NEGATIVE_REGULATION_OF_T_CELL_PROLIFERATION	0.0423788	wholeblood
0.00651387	GO_REGULATION_OF_RECEPTOR_MEDIATED_ENDOCYTOSIS	0.0428717	wholeblood
0.00310488	GO_NEGATIVE_REGULATION_OF_APOPTOTIC_SIGNALING_PATHWAY	0.0429073	muscleskeletal
0.00102572	GO_REGULATION_OF_CELL_ADHESION	0.0429255	lung
0.00245962	GO_NEUROLOGICAL_SYSTEM_PROCESS	0.0429561	adiposesubcutaneous
0.00103707	GO_BRANCHING_MORPHOGENESIS_OF_AN_EPITHELIAL_TUBE	0.0429949	lung
0.00657005	GO_NEURON_APOPTOTIC_PROCESS	0.0431774	wholeblood
0.0066887	GO_INTRINSIC_APOPTOTIC_SIGNALING_PATHWAY_IN_RESPONSE_TO_DNA_DAMAGE	0.0437829	wholeblood
0.0066918	GO_NON_RECOMBINATIONAL_REPAIR	0.0437829	wholeblood
0.0066918	GO_REGULATION_OF_VIRAL_TRANSCRIPTION	0.0437829	wholeblood
0.00671925	GO_RESPONSE_TO_INTERFERON_BETA	0.0438332	wholeblood
0.00671925	GO_NEGATIVE_REGULATION_OF_ANTIGEN_RECEPTOR_MEDIATED_SIGNALING_PATHWAY	0.0438332	wholeblood
0.00224469	GO_REGULATION_OF_CYTOPLASMIC_TRANSPORT	0.0440594	arterytibial
0.00320828	GO_REGULATION_OF_TRANSCRIPTION_FROM_RNA_POLYMERASE_II_PROMOTER	0.0441985	muscleskeletal
0.00105644	GO_ISOPRENOID_METABOLIC_PROCESS	0.0442112	esophagusmucosa
0.00108579	GO_REGULATION_OF_RESPONSE_TO_WOUNDING	0.0443165	lung
0.00109368	GO_LOCOMOTORY_EXPLORATION_BEHAVIOR	0.0443165	lung
0.00109892	GO_DETECTION_OF_STIMULUS	0.0443165	lung
0.0032518	GO_SUBSTANTIA_NIGRA_DEVELOPMENT	0.0446595	muscleskeletal
0.00112207	GO_HETEROPHILIC_CELL_CELL_ADHESION_VIA_PLASMA_MEMBRANE_CELL_ADHESION_MOLECULES	0.0448425	lung
0.00328869	GO_POSITIVE_REGULATION_OF_PROTEASOMAL_PROTEIN_CATABOLIC_PROCESS	0.0450267	muscleskeletal
0.0011458	GO_REGULATION_OF_PATHWAY_RESTRICTED_SMAD_PROTEIN_PHOSPHORYLATION	0.0451264	lung
0.00114952	GO_CELL_JUNCTION_ORGANIZATION	0.0451264	lung
0.00699613	GO_NEGATIVE_REGULATION_OF_LYMPHOCYTE_APOPTOTIC_PROCESS	0.0455056	wholeblood
0.00699613	GO_T_CELL_MEDIATED_IMMUNITY	0.0455056	wholeblood
0.00701419	GO_VESICLE_LOCALIZATION	0.0455563	wholeblood
0.0033548	GO_REGULATION_OF_RECEPTOR_ACTIVITY	0.0457904	muscleskeletal
0.000610041	GO_EYE_MORPHOGENESIS	0.0458668	skinsunexposedlowerleg
0.00338357	GO_MITOCHONDRION_MORPHOGENESIS	0.0459007	muscleskeletal
0.00338357	GO_NEGATIVE_REGULATION_OF_MRNA_SPLICING_VIA_SPLICEOSOME	0.0459007	muscleskeletal
0.00710396	GO_NEGATIVE_REGULATION_OF_RESPONSE_TO_EXTERNAL_STIMULUS	0.0460719	wholeblood
0.0071297	GO_REGULATION_OF_PHOSPHOLIPASE_C_ACTIVITY	0.046104	wholeblood
0.0071297	GO_REGULATION_OF_ACTIVATED_T_CELL_PROLIFERATION	0.046104	wholeblood
0.00236551	GO_DEVELOPMENTAL_CELL_GROWTH	0.0462265	arterytibial
0.00342992	GO_INTRACELLULAR_STEROID_HORMONE_RECEPTOR_SIGNALING_PATHWAY	0.0463876	muscleskeletal
[truncated: 669 more rows]

## Sheet: KEGG Tissue-Associated GSEA
pvalue	GeneSet	BH_FDR	Tissue
3.60331e-33	KEGG_PARKINSONS_DISEASE	6.70215e-31	muscleskeletal
1.81324e-31	KEGG_OXIDATIVE_PHOSPHORYLATION	1.68631e-29	muscleskeletal
4.4836e-26	KEGG_ALZHEIMERS_DISEASE	2.77983e-24	muscleskeletal
3.25979e-26	KEGG_NATURAL_KILLER_CELL_MEDIATED_CYTOTOXICITY	6.0632e-24	wholeblood
1.06662e-24	KEGG_HUNTINGTONS_DISEASE	4.95978e-23	muscleskeletal
9.70099e-20	KEGG_RIBOSOME	1.80439e-17	skins
2.07917e-14	KEGG_PROTEASOME	7.73453e-13	muscleskeletal
1.62406e-14	KEGG_CHEMOKINE_SIGNALING_PATHWAY	1.51038e-12	wholeblood
3.34416e-12	KEGG_CARDIAC_MUSCLE_CONTRACTION	1.03669e-10	muscleskeletal
1.92638e-12	KEGG_T_CELL_RECEPTOR_SIGNALING_PATHWAY	1.19435e-10	wholeblood
8.14063e-13	KEGG_FOCAL_ADHESION	1.51416e-10	arterytibial
1.8283e-12	KEGG_SPLICEOSOME	1.70032e-10	skins
7.50599e-12	KEGG_B_CELL_RECEPTOR_SIGNALING_PATHWAY	3.49029e-10	wholeblood
1.15517e-10	KEGG_HEMATOPOIETIC_CELL_LINEAGE	4.29725e-09	wholeblood
2.90171e-10	KEGG_ANTIGEN_PROCESSING_AND_PRESENTATION	8.2758e-09	wholeblood
3.11455e-10	KEGG_CYTOKINE_CYTOKINE_RECEPTOR_INTERACTION	8.2758e-09	wholeblood
2.47353e-08	KEGG_CITRATE_CYCLE_TCA_CYCLE	6.57251e-07	muscleskeletal
8.70056e-08	KEGG_PRIMARY_IMMUNODEFICIENCY	1.90801e-06	wholeblood
9.23229e-08	KEGG_TOLL_LIKE_RECEPTOR_SIGNALING_PATHWAY	1.90801e-06	wholeblood
1.14368e-07	KEGG_LEISHMANIA_INFECTION	2.12724e-06	wholeblood
2.34438e-08	KEGG_VASCULAR_SMOOTH_MUSCLE_CONTRACTION	2.18027e-06	arterytibial
1.75282e-07	KEGG_SYSTEMIC_LUPUS_ERYTHEMATOSUS	2.96385e-06	wholeblood
3.26186e-07	KEGG_GRAFT_VERSUS_HOST_DISEASE	5.05589e-06	wholeblood
5.29101e-07	KEGG_FC_GAMMA_R_MEDIATED_PHAGOCYTOSIS	7.57021e-06	wholeblood
6.97659e-08	KEGG_CELL_CYCLE	1.29765e-05	esophagusmucosa
3.29783e-07	KEGG_ECM_RECEPTOR_INTERACTION	1.94681e-05	arterytibial
4.18668e-07	KEGG_REGULATION_OF_ACTIN_CYTOSKELETON	1.94681e-05	arterytibial
5.54959e-07	KEGG_ARRHYTHMOGENIC_RIGHT_VENTRICULAR_CARDIOMYOPATHY_ARVC	2.06445e-05	arterytibial
2.57929e-06	KEGG_APOPTOSIS	3.42678e-05	wholeblood
4.71534e-06	KEGG_NEUROTROPHIN_SIGNALING_PATHWAY	5.84703e-05	wholeblood
7.79046e-07	KEGG_PPAR_SIGNALING_PATHWAY	0.000144903	adiposesubcutaneous
1.4654e-05	KEGG_NON_SMALL_CELL_LUNG_CANCER	0.000170353	wholeblood
2.37281e-05	KEGG_PANCREATIC_CANCER	0.000259614	wholeblood
8.59593e-06	KEGG_DILATED_CARDIOMYOPATHY	0.000266474	arterytibial
5.33175e-06	KEGG_RNA_DEGRADATION	0.000330568	skins
3.51553e-05	KEGG_RIG_I_LIKE_RECEPTOR_SIGNALING_PATHWAY	0.000363271	wholeblood
3.7203e-05	KEGG_FC_EPSILON_RI_SIGNALING_PATHWAY	0.000364198	wholeblood
2.27006e-05	KEGG_PYRUVATE_METABOLISM	0.000527789	muscleskeletal
2.17339e-05	KEGG_HYPERTROPHIC_CARDIOMYOPATHY_HCM	0.0005775	arterytibial
9.26182e-05	KEGG_LYSOSOME	0.000861349	wholeblood
0.000109677	KEGG_ALLOGRAFT_REJECTION	0.000971423	wholeblood
0.000137121	KEGG_ACUTE_MYELOID_LEUKEMIA	0.0011593	wholeblood
1.94241e-05	KEGG_METABOLISM_OF_XENOBIOTICS_BY_CYTOCHROME_P450	0.00152452	esophagusmucosa
2.4922e-05	KEGG_GLYCOSPHINGOLIPID_BIOSYNTHESIS_LACTO_AND_NEOLACTO_SERIES	0.00152452	esophagusmucosa
3.27854e-05	KEGG_DRUG_METABOLISM_CYTOCHROME_P450	0.00152452	esophagusmucosa
0.000201772	KEGG_LEUKOCYTE_TRANSENDOTHELIAL_MIGRATION	0.00159595	wholeblood
0.000205929	KEGG_ENDOCYTOSIS	0.00159595	wholeblood
0.000252215	KEGG_NOD_LIKE_RECEPTOR_SIGNALING_PATHWAY	0.00187648	wholeblood
0.0002689	KEGG_REGULATION_OF_ACTIN_CYTOSKELETON	0.00192367	wholeblood
9.51554e-05	KEGG_HYPERTROPHIC_CARDIOMYOPATHY_HCM	0.00196654	muscleskeletal
0.00030206	KEGG_JAK_STAT_SIGNALING_PATHWAY	0.00208086	wholeblood
5.76415e-05	KEGG_DNA_REPLICATION	0.00214427	esophagusmucosa
1.41875e-05	KEGG_BASAL_CELL_CARCINOMA	0.00263887	skinsunexposedlowerleg
0.000155639	KEGG_UBIQUITIN_MEDIATED_PROTEOLYSIS	0.00273903	muscleskeletal
0.000161986	KEGG_DILATED_CARDIOMYOPATHY	0.00273903	muscleskeletal
0.000108943	KEGG_ASCORBATE_AND_ALDARATE_METABOLISM	0.00337724	esophagusmucosa
1.8854e-05	KEGG_BASAL_CELL_CARCINOMA	0.00350684	skinnotsunexposedsuprapubic
0.000625631	KEGG_EPITHELIAL_CELL_SIGNALING_IN_HELICOBACTER_PYLORI_INFECTION	0.00415598	wholeblood
4.38118e-05	KEGG_OLFACTORY_TRANSDUCTION	0.00425932	nervetibial
4.57991e-05	KEGG_CELL_ADHESION_MOLECULES_CAMS	0.00425932	nervetibial
7.54005e-05	KEGG_AXON_GUIDANCE	0.00485423	skinnotsunexposedsuprapubic
7.8294e-05	KEGG_HEDGEHOG_SIGNALING_PATHWAY	0.00485423	skinnotsunexposedsuprapubic
6.03707e-05	KEGG_HEDGEHOG_SIGNALING_PATHWAY	0.00561447	skinsunexposedlowerleg
0.000932546	KEGG_AUTOIMMUNE_THYROID_DISEASE	0.00598116	wholeblood
6.7463e-05	KEGG_RETINOL_METABOLISM	0.00627406	adiposesubcutaneous
0.00101437	KEGG_PATHOGENIC_ESCHERICHIA_COLI_INFECTION	0.00628912	wholeblood
0.00010451	KEGG_VALINE_LEUCINE_AND_ISOLEUCINE_DEGRADATION	0.00647963	adiposesubcutaneous
0.00112602	KEGG_TYPE_I_DIABETES_MELLITUS	0.00669031	wholeblood
0.00115102	KEGG_PROSTATE_CANCER	0.00669031	wholeblood
0.00133034	KEGG_CHRONIC_MYELOID_LEUKEMIA	0.00749826	wholeblood
0.00146403	KEGG_NOTCH_SIGNALING_PATHWAY	0.00797972	wholeblood
0.00150156	KEGG_COLORECTAL_CANCER	0.00797972	wholeblood
0.00162961	KEGG_REGULATION_OF_AUTOPHAGY	0.00841967	wholeblood
0.000607236	KEGG_FATTY_ACID_METABOLISM	0.00941216	muscleskeletal
0.00041861	KEGG_ADHERENS_JUNCTION	0.00973269	arterytibial
0.000212689	KEGG_NUCLEOTIDE_EXCISION_REPAIR	0.00989004	skins
0.0021041	KEGG_CYTOSOLIC_DNA_SENSING_PATHWAY	0.0105774	wholeblood
0.000231494	KEGG_FATTY_ACID_METABOLISM	0.0107645	adiposesubcutaneous
0.00279192	KEGG_MAPK_SIGNALING_PATHWAY	0.0136657	wholeblood
0.000518139	KEGG_P53_SIGNALING_PATHWAY	0.0137677	esophagusmucosa
0.00297863	KEGG_GLIOMA	0.0142058	wholeblood
0.00071656	KEGG_GLUTATHIONE_METABOLISM	0.01666	esophagusmucosa
0.000451081	KEGG_PEROXISOME	0.0167802	adiposesubcutaneous
0.000862326	KEGG_OOCYTE_MEIOSIS	0.0178214	esophagusmucosa
0.00398955	KEGG_PATHWAYS_IN_CANCER	0.0185514	wholeblood
0.00423117	KEGG_THYROID_CANCER	0.019195	wholeblood
0.00114124	KEGG_O_GLYCAN_BIOSYNTHESIS	0.0203708	esophagusmucosa
0.00120472	KEGG_ARACHIDONIC_ACID_METABOLISM	0.0203708	esophagusmucosa
0.0048178	KEGG_INTESTINAL_IMMUNE_NETWORK_FOR_IGA_PRODUCTION	0.0208424	wholeblood
0.00481841	KEGG_PANTOTHENATE_AND_COA_BIOSYNTHESIS	0.0208424	wholeblood
0.000115958	KEGG_TASTE_TRANSDUCTION	0.0215682	thyroid
0.00154878	KEGG_LINOLEIC_ACID_METABOLISM	0.0226739	esophagusmucosa
0.00158474	KEGG_STEROID_HORMONE_BIOSYNTHESIS	0.0226739	esophagusmucosa
0.00543715	KEGG_PHOSPHATIDYLINOSITOL_SIGNALING_SYSTEM	0.0229843	wholeblood
0.00188378	KEGG_PENTOSE_AND_GLUCURONATE_INTERCONVERSIONS	0.0250273	esophagusmucosa
0.00126218	KEGG_TGF_BETA_SIGNALING_PATHWAY	0.026085	arterytibial
0.00084624	KEGG_PYRUVATE_METABOLISM	0.0262334	adiposesubcutaneous
0.0010002	KEGG_NEUROACTIVE_LIGAND_RECEPTOR_INTERACTION	0.0265769	adiposesubcutaneous
0.000783322	KEGG_OXIDATIVE_PHOSPHORYLATION	0.0291396	skins
0.00236473	KEGG_ENDOCYTOSIS	0.0293226	esophagusmucosa
0.00163895	KEGG_WNT_SIGNALING_PATHWAY	0.0304845	arterytibial
0.00133648	KEGG_CITRATE_CYCLE_TCA_CYCLE	0.0310731	adiposesubcutaneous
0.00191622	KEGG_CALCIUM_SIGNALING_PATHWAY	0.0324015	arterytibial
0.00806162	KEGG_VIBRIO_CHOLERAE_INFECTION	0.0329646	wholeblood
0.00815255	KEGG_RENAL_CELL_CARCINOMA	0.0329646	wholeblood
0.00303256	KEGG_RETINOL_METABOLISM	0.0352535	esophagusmucosa
0.00339814	KEGG_TERPENOID_BACKBONE_BIOSYNTHESIS	0.0355838	esophagusmucosa
0.00344359	KEGG_DRUG_METABOLISM_OTHER_ENZYMES	0.0355838	esophagusmucosa
0.002516	KEGG_PROPANOATE_METABOLISM	0.0359982	muscleskeletal
0.00981714	KEGG_GLYCOSAMINOGLYCAN_DEGRADATION	0.0388508	wholeblood
0.0032518	KEGG_VALINE_LEUCINE_AND_ISOLEUCINE_DEGRADATION	0.0413006	muscleskeletal
0.00333069	KEGG_SPLICEOSOME	0.0413006	muscleskeletal
0.00426196	KEGG_AXON_GUIDANCE	0.0415736	esophagusmucosa
0.00447028	KEGG_PORPHYRIN_AND_CHLOROPHYLL_METABOLISM	0.0415736	esophagusmucosa
0.00135501	KEGG_UBIQUITIN_MEDIATED_PROTEOLYSIS	0.0420054	skins
0.0114538	KEGG_VEGF_SIGNALING_PATHWAY	0.0443834	wholeblood
0.0117237	KEGG_GLYCEROPHOSPHOLIPID_METABOLISM	0.044502	wholeblood
0.0123141	KEGG_ENDOMETRIAL_CANCER	0.0458084	wholeblood
0.0146233	KEGG_NON_HOMOLOGOUS_END_JOINING	0.0533319	wholeblood
0.000863109	KEGG_AXON_GUIDANCE	0.0535128	skinsunexposedlowerleg
0.00203868	KEGG_BASAL_TRANSCRIPTION_FACTORS	0.0541707	skins
0.00308027	KEGG_BUTANOATE_METABOLISM	0.056772	adiposesubcutaneous
0.00321911	KEGG_DRUG_METABOLISM_CYTOCHROME_P450	0.056772	adiposesubcutaneous
0.00352616	KEGG_AXON_GUIDANCE	0.056772	adiposesubcutaneous
0.00366271	KEGG_PRIMARY_BILE_ACID_BIOSYNTHESIS	0.056772	adiposesubcutaneous
0.00676238	KEGG_PEROXISOME	0.0598954	esophagusmucosa
0.0181563	KEGG_INOSITOL_PHOSPHATE_METABOLISM	0.0640775	wholeblood
0.0182587	KEGG_SNARE_INTERACTIONS_IN_VESICULAR_TRANSPORT	0.0640775	wholeblood
0.00158443	KEGG_ENDOCYTOSIS	0.0698171	skinnotsunexposedsuprapubic
0.0018768	KEGG_WNT_SIGNALING_PATHWAY	0.0698171	skinnotsunexposedsuprapubic
0.0213531	KEGG_INSULIN_SIGNALING_PATHWAY	0.0735496	wholeblood
0.0222413	KEGG_AMYOTROPHIC_LATERAL_SCLEROSIS_ALS	0.0743487	wholeblood
0.0227843	KEGG_TYPE_II_DIABETES_MELLITUS	0.0743487	wholeblood
0.0227843	KEGG_VASOPRESSIN_REGULATED_WATER_REABSORPTION	0.0743487	wholeblood
0.00488462	KEGG_INOSITOL_PHOSPHATE_METABOLISM	0.0757116	arterytibial
0.0067302	KEGG_GLYOXYLATE_AND_DICARBOXYLATE_METABOLISM	0.0770924	muscleskeletal
0.00704608	KEGG_PEROXISOME	0.0770924	muscleskeletal
0.000416004	KEGG_VASCULAR_SMOOTH_MUSCLE_CONTRACTION	0.0773768	lung
0.00543631	KEGG_FOCAL_ADHESION	0.0777811	adiposesubcutaneous
0.000887127	KEGG_CYTOKINE_CYTOKINE_RECEPTOR_INTERACTION	0.0825028	lung
0.00809999	KEGG_CALCIUM_SIGNALING_PATHWAY	0.0836999	muscleskeletal
0.00996012	KEGG_PATHOGENIC_ESCHERICHIA_COLI_INFECTION	0.0842083	esophagusmucosa
0.0277721	KEGG_AMINO_SUGAR_AND_NUCLEOTIDE_SUGAR_METABOLISM	0.0884881	wholeblood
0.0280688	KEGG_BLADDER_CANCER	0.0884881	wholeblood
0.00404612	KEGG_MISMATCH_REPAIR	0.0940723	skins
0.00712059	KEGG_GLYCEROLIPID_METABOLISM	0.0946022	adiposesubcutaneous
0.00295486	KEGG_WNT_SIGNALING_PATHWAY	0.0992593	skinsunexposedlowerleg
0.00313773	KEGG_MELANOGENESIS	0.0992593	skinsunexposedlowerleg
0.00320191	KEGG_SPHINGOLIPID_METABOLISM	0.0992593	skinsunexposedlowerleg

## Sheet: Biocarta Tissue-Associated GSEA
pvalue	GeneSet	BH_FDR	Tissue
8.34199e-11	BIOCARTA_PROTEASOME_PATHWAY	1.81021e-08	muscleskeletal
7.73251e-09	BIOCARTA_NKT_PATHWAY	1.67796e-06	wholeblood
1.17749e-06	BIOCARTA_KREB_PATHWAY	0.000127758	muscleskeletal
3.04778e-06	BIOCARTA_PGC1A_PATHWAY	0.000220456	muscleskeletal
4.80231e-06	BIOCARTA_HCMV_PATHWAY	0.00052105	wholeblood
8.74567e-06	BIOCARTA_TOLL_PATHWAY	0.000629341	wholeblood
1.4402e-05	BIOCARTA_IL2RB_PATHWAY	0.000629341	wholeblood
1.4501e-05	BIOCARTA_MPR_PATHWAY	0.000629341	wholeblood
4.06579e-05	BIOCARTA_FMLP_PATHWAY	0.00115546	wholeblood
4.25977e-05	BIOCARTA_DC_PATHWAY	0.00115546	wholeblood
4.25977e-05	BIOCARTA_PML_PATHWAY	0.00115546	wholeblood
5.07288e-05	BIOCARTA_MAPK_PATHWAY	0.00120253	wholeblood
5.54162e-05	BIOCARTA_NKCELLS_PATHWAY	0.00120253	wholeblood
0.000102656	BIOCARTA_CTL_PATHWAY	0.00181629	wholeblood
0.000102656	BIOCARTA_SALMONELLA_PATHWAY	0.00181629	wholeblood
0.00010881	BIOCARTA_KERATINOCYTE_PATHWAY	0.00181629	wholeblood
0.000147981	BIOCARTA_CDC42RAC_PATHWAY	0.0022937	wholeblood
0.000184781	BIOCARTA_IL1R_PATHWAY	0.00253602	wholeblood
0.000186988	BIOCARTA_HIVNEF_PATHWAY	0.00253602	wholeblood
0.000199463	BIOCARTA_STRESS_PATHWAY	0.00254608	wholeblood
0.000232213	BIOCARTA_FCER1_PATHWAY	0.00279946	wholeblood
0.000287423	BIOCARTA_RHO_PATHWAY	0.00328267	wholeblood
0.000338089	BIOCARTA_NFKB_PATHWAY	0.00366827	wholeblood
0.000558179	BIOCARTA_MAL_PATHWAY	0.00550568	wholeblood
0.000558179	BIOCARTA_TH1TH2_PATHWAY	0.00550568	wholeblood
0.000644375	BIOCARTA_BCR_PATHWAY	0.00607954	wholeblood
0.000114831	BIOCARTA_ETC_PATHWAY	0.0062296	muscleskeletal
0.00097966	BIOCARTA_TID_PATHWAY	0.00885776	wholeblood
0.000305538	BIOCARTA_CHREBP2_PATHWAY	0.0132604	muscleskeletal
0.0015515	BIOCARTA_BIOPEPTIDES_PATHWAY	0.013467	wholeblood
0.00167662	BIOCARTA_IL10_PATHWAY	0.013475	wholeblood
0.00167662	BIOCARTA_NO2IL12_PATHWAY	0.013475	wholeblood
0.00179081	BIOCARTA_FAS_PATHWAY	0.0138787	wholeblood
0.00223355	BIOCARTA_TCAPOPTOSIS_PATHWAY	0.0167131	wholeblood
0.00258872	BIOCARTA_IL12_PATHWAY	0.0183796	wholeblood
0.00274609	BIOCARTA_TCYTOTOXIC_PATHWAY	0.0183796	wholeblood
0.00274609	BIOCARTA_THELPER_PATHWAY	0.0183796	wholeblood
0.00279506	BIOCARTA_CALCINEURIN_PATHWAY	0.0183796	wholeblood
0.00288273	BIOCARTA_TALL1_PATHWAY	0.0183986	wholeblood
0.00298699	BIOCARTA_PYK2_PATHWAY	0.0185193	wholeblood
9.75181e-05	BIOCARTA_INTEGRIN_PATHWAY	0.0211614	arterytibial
0.00395092	BIOCARTA_CCR3_PATHWAY	0.0225619	wholeblood
0.00395092	BIOCARTA_CERAMIDE_PATHWAY	0.0225619	wholeblood
0.00395092	BIOCARTA_IL2_PATHWAY	0.0225619	wholeblood
0.00407174	BIOCARTA_PAR1_PATHWAY	0.0226556	wholeblood
0.00423117	BIOCARTA_TNFR1_PATHWAY	0.0229541	wholeblood
0.0048178	BIOCARTA_TCR_PATHWAY	0.0235168	wholeblood
0.00481841	BIOCARTA_RELA_PATHWAY	0.0235168	wholeblood
0.00498513	BIOCARTA_GRANULOCYTES_PATHWAY	0.0235168	wholeblood
0.00498513	BIOCARTA_CACAM_PATHWAY	0.0235168	wholeblood
0.00498513	BIOCARTA_D4GDI_PATHWAY	0.0235168	wholeblood
0.00498513	BIOCARTA_PS1_PATHWAY	0.0235168	wholeblood
0.000303395	BIOCARTA_MCM_PATHWAY	0.0249685	esophagusmucosa
0.0004034	BIOCARTA_CELLCYCLE_PATHWAY	0.0249685	esophagusmucosa
0.000458405	BIOCARTA_G1_PATHWAY	0.0249685	esophagusmucosa
0.000460249	BIOCARTA_SRCRPTP_PATHWAY	0.0249685	esophagusmucosa
0.00582186	BIOCARTA_CXCR4_PATHWAY	0.0257825	wholeblood
0.00582186	BIOCARTA_NTHI_PATHWAY	0.0257825	wholeblood
0.00582186	BIOCARTA_RAS_PATHWAY	0.0257825	wholeblood
0.00671925	BIOCARTA_CSK_PATHWAY	0.0285897	wholeblood
0.00671925	BIOCARTA_ACTINY_PATHWAY	0.0285897	wholeblood
0.00761111	BIOCARTA_IL7_PATHWAY	0.0305854	wholeblood
0.00761111	BIOCARTA_CCR5_PATHWAY	0.0305854	wholeblood
0.00761111	BIOCARTA_ERK5_PATHWAY	0.0305854	wholeblood
0.00835962	BIOCARTA_BARRESTIN_SRC_PATHWAY	0.0324927	wholeblood
0.00868468	BIOCARTA_SRCRPTP_PATHWAY	0.0324927	wholeblood
0.00868468	BIOCARTA_CDK5_PATHWAY	0.0324927	wholeblood
0.00868468	BIOCARTA_BARR_MAPK_PATHWAY	0.0324927	wholeblood
0.00922653	BIOCARTA_P38MAPK_PATHWAY	0.0339349	wholeblood
0.0105657	BIOCARTA_GPCR_PATHWAY	0.0382125	wholeblood
0.011464	BIOCARTA_TNFR2_PATHWAY	0.0407816	wholeblood
0.0131519	BIOCARTA_IL22BP_PATHWAY	0.0460317	wholeblood
0.0138093	BIOCARTA_DEATH_PATHWAY	0.0475652	wholeblood
0.0146233	BIOCARTA_RAB_PATHWAY	0.049582	wholeblood
0.0156631	BIOCARTA_RACCYCD_PATHWAY	0.0514983	wholeblood
0.0156631	BIOCARTA_CREB_PATHWAY	0.0514983	wholeblood
0.0165804	BIOCARTA_CTLA4_PATHWAY	0.0537006	wholeblood
0.0169221	BIOCARTA_MYOSIN_PATHWAY	0.0540015	wholeblood
0.0182587	BIOCARTA_INTEGRIN_PATHWAY	0.0574221	wholeblood
0.0190576	BIOCARTA_CASPASE_PATHWAY	0.0590784	wholeblood
0.0196335	BIOCARTA_41BB_PATHWAY	0.0600066	wholeblood
0.0207613	BIOCARTA_GSK3_PATHWAY	0.0625722	wholeblood
0.00150319	BIOCARTA_MPR_PATHWAY	0.0652384	esophagusmucosa
0.000651555	BIOCARTA_EDG1_PATHWAY	0.0666416	arterytibial
0.000921312	BIOCARTA_HDAC_PATHWAY	0.0666416	arterytibial
0.0228845	BIOCARTA_RANKL_PATHWAY	0.0671073	wholeblood
0.0228845	BIOCARTA_GATA3_PATHWAY	0.0671073	wholeblood
0.0255023	BIOCARTA_ECM_PATHWAY	0.0728889	wholeblood
0.0258638	BIOCARTA_IL4_PATHWAY	0.0728889	wholeblood
0.0258638	BIOCARTA_SODD_PATHWAY	0.0728889	wholeblood
0.0277771	BIOCARTA_AT1R_PATHWAY	0.0762991	wholeblood
0.0277771	BIOCARTA_PDGF_PATHWAY	0.0762991	wholeblood
0.00149632	BIOCARTA_ECM_PATHWAY	0.0811753	arterytibial
0.031362	BIOCARTA_MITOCHONDRIA_PATHWAY	0.0850694	wholeblood
0.00235372	BIOCARTA_RANMS_PATHWAY	0.0851263	esophagusmucosa
0.0333473	BIOCARTA_VIP_PATHWAY	0.0883117	wholeblood
0.0337782	BIOCARTA_CYTOKINE_PATHWAY	0.0883117	wholeblood
0.0337782	BIOCARTA_IL3_PATHWAY	0.0883117	wholeblood
0.0346542	BIOCARTA_MET_PATHWAY	0.0895234	wholeblood
0.0386034	BIOCARTA_NDKDYNAMIN_PATHWAY	0.0947717	wholeblood
0.0386034	BIOCARTA_MEF2D_PATHWAY	0.0947717	wholeblood
0.0387692	BIOCARTA_NFAT_PATHWAY	0.0947717	wholeblood
0.0401797	BIOCARTA_ASBCELL_PATHWAY	0.0947717	wholeblood
0.0401797	BIOCARTA_BLYMPHOCYTE_PATHWAY	0.0947717	wholeblood
0.0401797	BIOCARTA_SET_PATHWAY	0.0947717	wholeblood
0.0401797	BIOCARTA_TCRA_PATHWAY	0.0947717	wholeblood
0.0401797	BIOCARTA_MONOCYTE_PATHWAY	0.0947717	wholeblood
0.0413526	BIOCARTA_CHEMICAL_PATHWAY	0.0964895	wholeblood
0.0427095	BIOCARTA_GH_PATHWAY	0.0985953	wholeblood

## Sheet: Reactome Tissue-Associated GSEA
pvalue	GeneSet	BH_FDR	Tissue
3.74673e-51	REACTOME_TCA_CYCLE_AND_RESPIRATORY_ELECTRON_TRANSPORT	2.5253e-48	muscleskeletal
1.93542e-45	REACTOME_RESPIRATORY_ELECTRON_TRANSPORT_ATP_SYNTHESIS_BY_CHEMIOSMOTIC_COUPLING_AND_HEAT_PRODUCTION_BY_UNCOUPLING_PROTEINS_	6.52237e-43	muscleskeletal
3.87324e-38	REACTOME_RESPIRATORY_ELECTRON_TRANSPORT	8.70188e-36	muscleskeletal
7.29605e-34	REACTOME_IMMUNE_SYSTEM	4.91754e-31	wholeblood
3.82139e-21	REACTOME_PEPTIDE_CHAIN_ELONGATION	2.57561e-18	skins
1.87727e-19	REACTOME_INFLUENZA_LIFE_CYCLE	6.23564e-17	skins
2.77551e-19	REACTOME_3_UTR_MEDIATED_TRANSLATIONAL_REGULATION	6.23564e-17	skins
1.09651e-18	REACTOME_METABOLISM_OF_RNA	1.84762e-16	skins
1.84835e-18	REACTOME_INFLUENZA_VIRAL_RNA_TRANSCRIPTION_AND_REPLICATION	2.35011e-16	skins
2.09209e-18	REACTOME_TRANSLATION	2.35011e-16	skins
8.83692e-18	REACTOME_SRP_DEPENDENT_COTRANSLATIONAL_PROTEIN_TARGETING_TO_MEMBRANE	8.50869e-16	skins
1.10216e-17	REACTOME_ADAPTIVE_IMMUNE_SYSTEM	3.71428e-15	wholeblood
1.15269e-16	REACTOME_NONSENSE_MEDIATED_DECAY_ENHANCED_BY_THE_EXON_JUNCTION_COMPLEX	9.71139e-15	skins
8.1699e-17	REACTOME_CYTOKINE_SIGNALING_IN_IMMUNE_SYSTEM	1.83551e-14	wholeblood
6.28419e-16	REACTOME_ANTIGEN_PROCESSING_UBIQUITINATION_PROTEASOME_DEGRADATION	1.05889e-13	muscleskeletal
4.22089e-15	REACTOME_HEMOSTASIS	7.1122e-13	wholeblood
1.07492e-14	REACTOME_METABOLISM_OF_MRNA	8.04993e-13	skins
1.80415e-14	REACTOME_INNATE_IMMUNE_SYSTEM	2.432e-12	wholeblood
7.44491e-14	REACTOME_REGULATION_OF_ORNITHINE_DECARBOXYLASE_ODC	1.00357e-11	muscleskeletal
1.84385e-13	REACTOME_SCF_BETA_TRCP_MEDIATED_DEGRADATION_OF_EMI1	1.88977e-11	muscleskeletal
1.96266e-13	REACTOME_SIGNALING_BY_WNT	1.88977e-11	muscleskeletal
2.81759e-13	REACTOME_VIF_MEDIATED_DEGRADATION_OF_APOBEC3G	2.37382e-11	muscleskeletal
4.38768e-13	REACTOME_DESTABILIZATION_OF_MRNA_BY_AUF1_HNRNP_D0	3.28589e-11	muscleskeletal
5.01845e-13	REACTOME_IMMUNOREGULATORY_INTERACTIONS_BETWEEN_A_LYMPHOID_AND_A_NON_LYMPHOID_CELL	5.63739e-11	wholeblood
1.05548e-12	REACTOME_CDK_MEDIATED_PHOSPHORYLATION_AND_REMOVAL_OF_CDC6	7.11395e-11	muscleskeletal
2.50621e-12	REACTOME_CROSS_PRESENTATION_OF_SOLUBLE_EXOGENOUS_ANTIGENS_ENDOSOMES	1.40766e-10	muscleskeletal
2.50621e-12	REACTOME_AUTODEGRADATION_OF_THE_E3_UBIQUITIN_LIGASE_COP1	1.40766e-10	muscleskeletal
2.83158e-12	REACTOME_CLASS_I_MHC_MEDIATED_ANTIGEN_PROCESSING_PRESENTATION	1.46807e-10	muscleskeletal
2.88868e-12	REACTOME_FORMATION_OF_THE_TERNARY_COMPLEX_AND_SUBSEQUENTLY_THE_43S_COMPLEX	1.94697e-10	skins
5.7229e-12	REACTOME_P53_INDEPENDENT_G1_S_DNA_DAMAGE_CHECKPOINT	2.75517e-10	muscleskeletal
5.00186e-12	REACTOME_PROCESSING_OF_CAPPED_INTRON_CONTAINING_PRE_MRNA	3.06478e-10	skins
6.155e-13	REACTOME_CELL_CYCLE_MITOTIC	4.14847e-10	esophagusmucosa
9.26285e-12	REACTOME_PYRUVATE_METABOLISM_AND_CITRIC_ACID_TCA_CYCLE	4.16211e-10	muscleskeletal
9.97714e-12	REACTOME_CDT1_ASSOCIATION_WITH_THE_CDC6_ORC_ORIGIN_COMPLEX	4.20287e-10	muscleskeletal
1.61973e-11	REACTOME_MRNA_PROCESSING	9.09747e-10	skins
2.90829e-11	REACTOME_CITRIC_ACID_CYCLE_TCA_CYCLE	1.15305e-09	muscleskeletal
6.67115e-11	REACTOME_SCFSKP2_MEDIATED_DEGRADATION_OF_P27_P21	2.49797e-09	muscleskeletal
3.31336e-11	REACTOME_SIGNALING_BY_ILS	3.1903e-09	wholeblood
4.96648e-11	REACTOME_RNA_POL_I_PROMOTER_OPENING	4.18426e-09	wholeblood
1.60517e-11	REACTOME_CELL_CYCLE	5.40941e-09	esophagusmucosa
1.57205e-10	REACTOME_ACTIVATION_OF_NF_KAPPAB_IN_B_CELLS	5.57664e-09	muscleskeletal
2.1725e-10	REACTOME_P53_DEPENDENT_G1_DNA_DAMAGE_RESPONSE	7.32134e-09	muscleskeletal
9.84153e-11	REACTOME_PACKAGING_OF_TELOMERE_ENDS	7.37021e-09	wholeblood
2.44894e-10	REACTOME_REGULATION_OF_APOPTOSIS	7.85995e-09	muscleskeletal
3.47086e-10	REACTOME_STRIATED_MUSCLE_CONTRACTION	1.06334e-08	muscleskeletal
1.63341e-11	REACTOME_SMOOTH_MUSCLE_CONTRACTION	1.10092e-08	arterytibial
4.53147e-10	REACTOME_AUTODEGRADATION_OF_CDH1_BY_CDH1_APC_C	1.32792e-08	muscleskeletal
4.31362e-10	REACTOME_RNA_POL_II_TRANSCRIPTION	2.23645e-08	skins
8.66012e-10	REACTOME_APC_C_CDH1_MEDIATED_DEGRADATION_OF_CDC20_AND_OTHER_APC_C_CDH1_TARGETED_PROTEINS_IN_LATE_MITOSIS_EARLY_G1	2.43205e-08	muscleskeletal
8.18455e-10	REACTOME_ACTIVATION_OF_THE_MRNA_UPON_BINDING_OF_THE_CAP_BINDING_COMPLEX_AND_EIFS_AND_SUBSEQUENT_BINDING_TO_43S	3.94028e-08	skins
5.98208e-10	REACTOME_PLATELET_ACTIVATION_SIGNALING_AND_AGGREGATION	4.03192e-08	wholeblood
9.14448e-10	REACTOME_LATE_PHASE_OF_HIV_LIFE_CYCLE	4.10892e-08	skins
9.87609e-10	REACTOME_MRNA_SPLICING	4.1603e-08	skins
7.04444e-10	REACTOME_THE_ROLE_OF_NEF_IN_HIV1_REPLICATION_AND_DISEASE_PATHOGENESIS	4.31632e-08	wholeblood
8.65106e-10	REACTOME_TOLL_RECEPTOR_CASCADES	4.85901e-08	wholeblood
1.07852e-09	REACTOME_AMYLOIDS	5.59172e-08	wholeblood
1.18666e-09	REACTOME_INTERFERON_SIGNALING	5.71293e-08	wholeblood
2.52952e-09	REACTOME_CYCLIN_E_ASSOCIATED_EVENTS_DURING_G1_S_TRANSITION_	6.5573e-08	muscleskeletal
2.52952e-09	REACTOME_ASSEMBLY_OF_THE_PRE_REPLICATIVE_COMPLEX	6.5573e-08	muscleskeletal
3.06655e-09	REACTOME_DOWNSTREAM_SIGNALING_EVENTS_OF_B_CELL_RECEPTOR_BCR	7.65502e-08	muscleskeletal
3.74491e-09	REACTOME_MITOCHONDRIAL_PROTEIN_IMPORT	9.01454e-08	muscleskeletal
4.33969e-09	REACTOME_ER_PHAGOSOME_PATHWAY	1.0086e-07	muscleskeletal
1.94328e-10	REACTOME_GPCR_DOWNSTREAM_SIGNALING	1.30977e-07	adiposesubcutaneous
7.01676e-09	REACTOME_ORC1_REMOVAL_FROM_CHROMATIN	1.52558e-07	muscleskeletal
7.01676e-09	REACTOME_APC_C_CDC20_MEDIATED_DEGRADATION_OF_MITOTIC_PROTEINS	1.52558e-07	muscleskeletal
1.3759e-08	REACTOME_FORMATION_OF_ATP_BY_CHEMIOSMOTIC_COUPLING	2.89799e-07	muscleskeletal
6.5922e-09	REACTOME_INTERFERON_GAMMA_SIGNALING	2.9621e-07	wholeblood
1.63906e-08	REACTOME_HIV_INFECTION	3.34766e-07	muscleskeletal
1.83547e-09	REACTOME_DNA_REPLICATION	4.1237e-07	esophagusmucosa
2.14871e-08	REACTOME_REGULATION_OF_MITOTIC_CELL_CYCLE	4.25951e-07	muscleskeletal
1.46143e-09	REACTOME_SIGNALING_BY_GPCR	4.92502e-07	adiposesubcutaneous
2.87442e-08	REACTOME_REGULATION_OF_MRNA_STABILITY_BY_PROTEINS_THAT_BIND_AU_RICH_ELEMENTS	5.53531e-07	muscleskeletal
1.68415e-08	REACTOME_HIV_LIFE_CYCLE	6.67714e-07	skins
2.12034e-08	REACTOME_METABOLISM_OF_PROTEINS	7.9395e-07	skins
9.44202e-09	REACTOME_G1_S_SPECIFIC_TRANSCRIPTION	1.59098e-06	esophagusmucosa
4.41075e-08	REACTOME_DEPOSITION_OF_NEW_CENPA_CONTAINING_NUCLEOSOMES_AT_THE_CENTROMERE	1.85803e-06	wholeblood
1.22285e-07	REACTOME_M_G1_TRANSITION	2.28945e-06	muscleskeletal
7.88562e-08	REACTOME_NEF_MEDIATES_DOWN_MODULATION_OF_CELL_SURFACE_RECEPTORS_BY_RECRUITING_THEM_TO_CLATHRIN_ADAPTERS	2.9002e-06	wholeblood
8.35966e-08	REACTOME_INTERFERON_ALPHA_BETA_SIGNALING	2.9002e-06	wholeblood
8.47034e-08	REACTOME_RIG_I_MDA5_MEDIATED_INDUCTION_OF_IFN_ALPHA_BETA_PATHWAYS	2.9002e-06	wholeblood
8.60592e-08	REACTOME_MEIOTIC_RECOMBINATION	2.9002e-06	wholeblood
1.42914e-07	REACTOME_TCR_SIGNALING	4.58686e-06	wholeblood
3.05535e-07	REACTOME_METABOLISM_OF_AMINO_ACIDS_AND_DERIVATIVES	5.56569e-06	muscleskeletal
2.69597e-07	REACTOME_ACTIVATED_TLR4_SIGNALLING	8.19314e-06	wholeblood
2.79588e-07	REACTOME_MYD88_MAL_CASCADE_INITIATED_ON_PLASMA_MEMBRANE	8.19314e-06	wholeblood
3.98637e-08	REACTOME_G_ALPHA_S_SIGNALLING_EVENTS	8.95604e-06	adiposesubcutaneous
2.86745e-07	REACTOME_RNA_POL_II_PRE_TRANSCRIPTION_EVENTS	1.01719e-05	skins
1.12259e-06	REACTOME_HOST_INTERACTIONS_OF_HIV_FACTORS	1.99113e-05	muscleskeletal
2.60748e-07	REACTOME_MITOTIC_M_M_G1_PHASES	3.51488e-05	esophagusmucosa
2.06564e-06	REACTOME_ANTIGEN_PROCESSING_CROSS_PRESENTATION	3.56985e-05	muscleskeletal
2.27824e-06	REACTOME_SYNTHESIS_OF_DNA	3.83884e-05	muscleskeletal
1.40373e-06	REACTOME_MRNA_SPLICING_MINOR_PATHWAY	4.73058e-05	skins
4.38475e-07	REACTOME_G2_M_CHECKPOINTS	4.78265e-05	esophagusmucosa
4.96714e-07	REACTOME_E2F_MEDIATED_REGULATION_OF_DNA_REPLICATION	4.78265e-05	esophagusmucosa
3.1677e-06	REACTOME_SIGNALING_BY_THE_B_CELL_RECEPTOR_BCR	5.20738e-05	muscleskeletal
1.70856e-06	REACTOME_METABOLISM_OF_NON_CODING_RNA	5.44699e-05	skins
1.77795e-06	REACTOME_DNA_REPAIR	5.44699e-05	skins
2.17868e-06	REACTOME_TELOMERE_MAINTENANCE	6.11845e-05	wholeblood
7.67481e-07	REACTOME_MITOTIC_G1_G1_S_PHASES	6.46603e-05	esophagusmucosa
2.73664e-06	REACTOME_SIGNALLING_BY_NGF	7.37798e-05	wholeblood
3.06008e-06	REACTOME_TRANSCRIPTION	8.96737e-05	skins
5.74288e-06	REACTOME_FATTY_ACID_TRIACYLGLYCEROL_AND_KETONE_BODY_METABOLISM	9.21595e-05	muscleskeletal
1.25933e-06	REACTOME_ACTIVATION_OF_ATR_IN_RESPONSE_TO_REPLICATION_STRESS	9.43102e-05	esophagusmucosa
3.97023e-06	REACTOME_MEIOTIC_SYNAPSIS	0.000102921	wholeblood
4.51958e-06	REACTOME_NEGATIVE_REGULATORS_OF_RIG_I_MDA5_SIGNALING	0.000112822	wholeblood
1.81659e-06	REACTOME_G1_S_TRANSITION	0.000122438	esophagusmucosa
5.21741e-06	REACTOME_IL_2_SIGNALING	0.000125591	wholeblood
8.04965e-06	REACTOME_GLUCOSE_METABOLISM	0.000126174	muscleskeletal
2.30638e-06	REACTOME_APOPTOTIC_CLEAVAGE_OF_CELL_ADHESION_PROTEINS	0.000129541	esophagusmucosa
2.30638e-06	REACTOME_UNWINDING_OF_DNA	0.000129541	esophagusmucosa
4.64645e-06	REACTOME_TRANSPORT_OF_MATURE_TRANSCRIPT_TO_CYTOPLASM	0.000130488	skins
5.70035e-06	REACTOME_MEIOSIS	0.000132484	wholeblood
8.86612e-06	REACTOME_S_PHASE	0.000135813	muscleskeletal
1.14215e-05	REACTOME_G1_S_TRANSITION	0.000171069	muscleskeletal
9.24231e-06	REACTOME_REGULATION_OF_IFNG_SIGNALING	0.000207644	wholeblood
1.65655e-05	REACTOME_APOPTOSIS	0.00023801	muscleskeletal
1.65972e-05	REACTOME_MUSCLE_CONTRACTION	0.00023801	muscleskeletal
5.2713e-06	REACTOME_MITOTIC_PROMETAPHASE	0.000250898	esophagusmucosa
5.58378e-06	REACTOME_ACTIVATION_OF_THE_PRE_REPLICATIVE_COMPLEX	0.000250898	esophagusmucosa
5.58378e-06	REACTOME_DNA_STRAND_ELONGATION	0.000250898	esophagusmucosa
7.5868e-07	REACTOME_MUSCLE_CONTRACTION	0.000255675	arterytibial
1.88907e-05	REACTOME_MITOCHONDRIAL_FATTY_ACID_BETA_OXIDATION	0.000265257	muscleskeletal
1.2581e-05	REACTOME_TRAF6_MEDIATED_INDUCTION_OF_NFKB_AND_MAP_KINASES_UPON_TLR7_8_OR_9_ACTIVATION	0.000273534	wholeblood
1.20068e-05	REACTOME_NUCLEOTIDE_EXCISION_REPAIR	0.000323703	skins
1.44306e-06	REACTOME_HEMOSTASIS	0.000324208	arterytibial
2.55239e-05	REACTOME_PKB_MEDIATED_EVENTS	0.000351084	muscleskeletal
1.84155e-05	REACTOME_CELL_CYCLE	0.000387877	wholeblood
2.16718e-05	REACTOME_CLEAVAGE_OF_GROWING_TRANSCRIPT_IN_THE_TERMINATION_REGION_	0.000561801	skins
3.76783e-05	REACTOME_RNA_POL_I_TRANSCRIPTION	0.000752998	wholeblood
3.7985e-05	REACTOME_SIGNAL_REGULATORY_PROTEIN_SIRP_FAMILY_INTERACTIONS	0.000752998	wholeblood
3.74699e-05	REACTOME_HIV_INFECTION	0.00091284	skins
3.79221e-05	REACTOME_TRANSCRIPTION_COUPLED_NER_TC_NER	0.00091284	skins
5.00426e-05	REACTOME_MEMBRANE_TRAFFICKING	0.000963678	wholeblood
7.2421e-05	REACTOME_CELL_CYCLE_CHECKPOINTS	0.000976235	muscleskeletal
7.46558e-05	REACTOME_ADAPTIVE_IMMUNE_SYSTEM	0.000986628	muscleskeletal
2.49001e-05	REACTOME_BIOLOGICAL_OXIDATIONS	0.00104892	esophagusmucosa
5.66659e-05	REACTOME_ENDOSOMAL_VACUOLAR_PATHWAY	0.00106091	wholeblood
6.54038e-05	REACTOME_FACTORS_INVOLVED_IN_MEGAKARYOCYTE_DEVELOPMENT_AND_PLATELET_PRODUCTION	0.00116957	wholeblood
6.59404e-05	REACTOME_CHEMOKINE_RECEPTORS_BIND_CHEMOKINES	0.00116957	wholeblood
5.44097e-05	REACTOME_GLOBAL_GENOMIC_NER_GG_NER	0.00126456	skins
5.66767e-05	REACTOME_RNA_POL_II_TRANSCRIPTION_PRE_INITIATION_AND_PROMOTER_OPENING	0.00127334	skins
9.6559e-06	REACTOME_GPCR_LIGAND_BINDING	0.00162702	adiposesubcutaneous
4.13404e-05	REACTOME_S_PHASE	0.00163902	esophagusmucosa
0.000102656	REACTOME_EXTRINSIC_PATHWAY_FOR_APOPTOSIS	0.00177411	wholeblood
1.06125e-05	REACTOME_INTEGRIN_CELL_SURFACE_INTERACTIONS	0.00178821	arterytibial
8.38686e-05	REACTOME_FORMATION_OF_RNA_POL_II_ELONGATION_COMPLEX_	0.00182347	skins
0.000113939	REACTOME_P75_NTR_RECEPTOR_MEDIATED_SIGNALLING	0.00189774	wholeblood
0.000115441	REACTOME_LATENT_INFECTION_OF_HOMO_SAPIENS_WITH_MYCOBACTERIUM_TUBERCULOSIS	0.00189774	wholeblood
0.000155639	REACTOME_MITOTIC_G1_G1_S_PHASES	0.00201732	muscleskeletal
0.000101517	REACTOME_MRNA_3_END_PROCESSING	0.0021382	skins
3.21423e-06	REACTOME_OLFACTORY_SIGNALING_PATHWAY	0.00216639	nervetibial
0.000137121	REACTOME_TRANS_GOLGI_NETWORK_VESICLE_BUDDING	0.00220047	wholeblood
6.02012e-05	REACTOME_CYCLIN_A_B1_ASSOCIATED_EVENTS_DURING_G2_M_TRANSITION	0.0022542	esophagusmucosa
0.00015781	REACTOME_COSTIMULATION_BY_THE_CD28_FAMILY	0.0024577	wholeblood
0.000163891	REACTOME_TRIF_MEDIATED_TLR3_SIGNALING	0.0024577	wholeblood
0.00016409	REACTOME_SIGNALING_BY_GPCR	0.0024577	wholeblood
0.000189015	REACTOME_CHROMOSOME_MAINTENANCE	0.00276949	wholeblood
0.000205041	REACTOME_IL_3_5_AND_GM_CSF_SIGNALING	0.00294038	wholeblood
0.000229997	REACTOME_G_ALPHA_I_SIGNALLING_EVENTS	0.00319412	wholeblood
0.000232213	REACTOME_IL1_SIGNALING	0.00319412	wholeblood
0.000239127	REACTOME_SIGNALLING_TO_P38_VIA_RIT_AND_RIN	0.00322343	wholeblood
0.000256938	REACTOME_NFKB_AND_MAP_KINASES_ACTIVATION_MEDIATED_BY_TLR4_SIGNALING_REPERTOIRE	0.0033719	wholeblood
0.000260147	REACTOME_SIGNALLING_TO_ERKS	0.0033719	wholeblood
3.41348e-05	REACTOME_EXTRACELLULAR_MATRIX_ORGANIZATION	0.00369596	arterytibial
3.45653e-05	REACTOME_RESPONSE_TO_ELEVATED_PLATELET_CYTOSOLIC_CA2_	0.00369596	arterytibial
3.83854e-05	REACTOME_CELL_EXTRACELLULAR_MATRIX_INTERACTIONS	0.00369596	arterytibial
0.000298527	REACTOME_ARMS_MEDIATED_ACTIVATION	0.00379637	wholeblood
0.00031185	REACTOME_ANTIGEN_ACTIVATES_B_CELL_RECEPTOR_LEADING_TO_GENERATION_OF_SECOND_MESSENGERS	0.00389236	wholeblood
0.000381219	REACTOME_NFKB_ACTIVATION_THROUGH_FADD_RIP1_PATHWAY_MEDIATED_BY_CASPASE_8_AND10	0.00467166	wholeblood
0.000416884	REACTOME_APOPTOSIS	0.0050175	wholeblood
0.00040489	REACTOME_PYRUVATE_METABOLISM	0.00514898	muscleskeletal
0.000435545	REACTOME_DOWNSTREAM_TCR_SIGNALING	0.00515013	wholeblood
0.0005304	REACTOME_SIGNALING_BY_THE_B_CELL_RECEPTOR_BCR	0.00616361	wholeblood
7.32661e-05	REACTOME_AXON_GUIDANCE	0.00617267	arterytibial
8.25328e-05	REACTOME_SEMA4D_IN_SEMAPHORIN_SIGNALING	0.00618079	arterytibial
0.0005746	REACTOME_TRAF6_MEDIATED_NFKB_ACTIVATION	0.00656408	wholeblood
0.000586461	REACTOME_NUCLEOTIDE_BINDING_DOMAIN_LEUCINE_RICH_REPEAT_CONTAINING_RECEPTOR_NLR_SIGNALING_PATHWAYS	0.00658791	wholeblood
0.000109943	REACTOME_PLATELET_ACTIVATION_SIGNALING_AND_AGGREGATION	0.00741015	arterytibial
0.000729884	REACTOME_GPVI_MEDIATED_ACTIVATION_CASCADE	0.00806463	wholeblood
0.000135769	REACTOME_PLATELET_HOMEOSTASIS	0.00831897	arterytibial
0.000249551	REACTOME_CELL_CYCLE_CHECKPOINTS	0.0088525	esophagusmucosa
0.00027156	REACTOME_KINESINS	0.00915157	esophagusmucosa
6.93126e-05	REACTOME_METABOLISM_OF_LIPIDS_AND_LIPOPROTEINS	0.00934333	adiposesubcutaneous
0.000474919	REACTOME_TRANSPORT_OF_MATURE_MRNA_DERIVED_FROM_AN_INTRONLESS_TRANSCRIPT	0.00969985	skins
0.000174271	REACTOME_COLLAGEN_FORMATION	0.00978822	arterytibial
0.00092335	REACTOME_CELL_SURFACE_INTERACTIONS_AT_THE_VASCULAR_WALL	0.0100377	wholeblood
0.000953887	REACTOME_SIGNALING_BY_NOTCH	0.0102051	wholeblood
0.00097966	REACTOME_PROLONGED_ERK_ACTIVATION_EVENTS	0.010317	wholeblood
0.000843394	REACTOME_GLUCONEOGENESIS	0.0105268	muscleskeletal
0.00105656	REACTOME_HIV_INFECTION	0.0109557	wholeblood
0.00110376	REACTOME_HOST_INTERACTIONS_OF_HIV_FACTORS	0.0112717	wholeblood
0.000108817	REACTOME_OPIOID_SIGNALLING	0.0113932	adiposesubcutaneous
0.000145951	REACTOME_METABOLISM_OF_VITAMINS_AND_COFACTORS	0.0113932	adiposesubcutaneous
0.000151268	REACTOME_FATTY_ACID_TRIACYLGLYCEROL_AND_KETONE_BODY_METABOLISM	0.0113932	adiposesubcutaneous
0.000152135	REACTOME_G_ALPHA_I_SIGNALLING_EVENTS	0.0113932	adiposesubcutaneous
0.000174242	REACTOME_VEGF_LIGAND_RECEPTOR_INTERACTIONS	0.0117439	adiposesubcutaneous
0.000199176	REACTOME_CLASS_A1_RHODOPSIN_LIKE_RECEPTORS	0.0122041	adiposesubcutaneous
0.0004034	REACTOME_G0_AND_EARLY_G1	0.0124385	esophagusmucosa
0.000406003	REACTOME_O_LINKED_GLYCOSYLATION_OF_MUCINS	0.0124385	esophagusmucosa
3.13404e-05	REACTOME_GPCR_LIGAND_BINDING	0.0124991	lung
3.70893e-05	REACTOME_SIGNALING_BY_GPCR	0.0124991	lung
0.00125642	REACTOME_GPCR_DOWNSTREAM_SIGNALING	0.0126392	wholeblood
0.000231494	REACTOME_G_ALPHA_Z_SIGNALLING_EVENTS	0.0130023	adiposesubcutaneous
0.00136658	REACTOME_CD28_DEPENDENT_VAV1_PATHWAY	0.0130694	wholeblood
0.00136658	REACTOME_REGULATION_OF_IFNA_SIGNALING	0.0130694	wholeblood
0.00137675	REACTOME_G_PROTEIN_BETA_GAMMA_SIGNALLING	0.0130694	wholeblood
0.00137675	REACTOME_ENDOSOMAL_SORTING_COMPLEX_REQUIRED_FOR_TRANSPORT_ESCRT	0.0130694	wholeblood
0.00107709	REACTOME_MTORC1_MEDIATED_SIGNALLING	0.0131993	muscleskeletal
4.02051e-05	REACTOME_INTERACTION_BETWEEN_L1_AND_ANKYRINS	0.0135491	nervetibial
0.000265075	REACTOME_G_ALPHA1213_SIGNALLING_EVENTS	0.0137431	arterytibial
0.000287548	REACTOME_PLC_BETA_MEDIATED_EVENTS	0.0140539	adiposesubcutaneous
0.000303227	REACTOME_SYNTHESIS_OF_BILE_ACIDS_AND_BILE_SALTS_VIA_7ALPHA_HYDROXYCHOLESTEROL	0.0140539	adiposesubcutaneous
0.000312771	REACTOME_PHOSPHOLIPASE_C_MEDIATED_CASCADE	0.0140539	adiposesubcutaneous
0.00151871	REACTOME_G_BETA_GAMMA_SIGNALLING_THROUGH_PI3KGAMMA	0.0142168	wholeblood
0.000303656	REACTOME_SEMA4D_INDUCED_CELL_MIGRATION_AND_GROWTH_CONE_COLLAPSE	0.0146189	arterytibial
0.0012406	REACTOME_REGULATION_OF_AMPK_ACTIVITY_VIA_LKB1	0.0149315	muscleskeletal
0.00128149	REACTOME_PPARA_ACTIVATES_GENE_EXPRESSION	0.0151531	muscleskeletal
0.000362707	REACTOME_SYNTHESIS_OF_BILE_ACIDS_AND_BILE_SALTS	0.015279	adiposesubcutaneous
0.00167662	REACTOME_TRAF6_MEDIATED_IRF7_ACTIVATION	0.01548	wholeblood
0.00179081	REACTOME_SYNTHESIS_OF_PIPS_AT_THE_PLASMA_MEMBRANE	0.0163109	wholeblood
0.00201127	REACTOME_G_ALPHA1213_SIGNALLING_EVENTS	0.0179991	wholeblood
0.00204344	REACTOME_SIGNALING_BY_SCF_KIT	0.0179991	wholeblood
0.00205627	REACTOME_SIGNALLING_TO_RAS	0.0179991	wholeblood
0.00238583	REACTOME_PHOSPHOLIPID_METABOLISM	0.020616	wholeblood
0.00107444	REACTOME_PROCESSING_OF_CAPPED_INTRONLESS_PRE_MRNA	0.0206906	skins
0.00107444	REACTOME_RNA_POL_I_TRANSCRIPTION_INITIATION	0.0206906	skins
0.00113173	REACTOME_RESPIRATORY_ELECTRON_TRANSPORT	0.0211885	skins
9.48664e-05	REACTOME_AXON_GUIDANCE	0.0213133	lung
0.00186939	REACTOME_TRNA_AMINOACYLATION	0.0217236	muscleskeletal
0.000511756	REACTOME_OPIOID_SIGNALLING	0.0227093	arterytibial
0.000539094	REACTOME_SEMAPHORIN_INTERACTIONS	0.0227093	arterytibial
0.00199919	REACTOME_MITOTIC_M_M_G1_PHASES	0.0228382	muscleskeletal
0.00274609	REACTOME_APOPTOSIS_INDUCED_DNA_FRAGMENTATION	0.0234287	wholeblood
0.00211995	REACTOME_ACTIVATED_AMPK_STIMULATES_FATTY_ACID_OXIDATION_IN_MUSCLE	0.0238141	muscleskeletal
0.00217989	REACTOME_REGULATION_OF_PYRUVATE_DEHYDROGENASE_PDH_COMPLEX	0.024086	muscleskeletal
0.00288273	REACTOME_CTNNB1_PHOSPHORYLATION_CASCADE	0.024287	wholeblood
0.000836065	REACTOME_ACTIVATION_OF_RAC	0.0245003	esophagusmucosa
0.00230025	REACTOME_RNA_POL_II_TRANSCRIPTION_PRE_INITIATION_AND_PROMOTER_OPENING	0.0250059	muscleskeletal
0.000178375	REACTOME_OTHER_SEMAPHORIN_INTERACTIONS	0.0256562	lung
0.000190328	REACTOME_GPCR_DOWNSTREAM_SIGNALING	0.0256562	lung
0.00315397	REACTOME_NGF_SIGNALLING_VIA_TRKA_FROM_THE_PLASMA_MEMBRANE	0.0262442	wholeblood
0.00326105	REACTOME_GOLGI_ASSOCIATED_VESICLE_BIOGENESIS	0.0268042	wholeblood
0.000704157	REACTOME_AMINE_LIGAND_BINDING_RECEPTORS	0.0279177	adiposesubcutaneous
0.00271339	REACTOME_RNA_POL_II_PRE_TRANSCRIPTION_EVENTS	0.029029	muscleskeletal
0.00104716	REACTOME_CHOLESTEROL_BIOSYNTHESIS	0.0293379	esophagusmucosa
0.0010882	REACTOME_APOPTOTIC_CLEAVAGE_OF_CELLULAR_PROTEINS	0.0293379	esophagusmucosa
0.00282709	REACTOME_METABOLISM_OF_MRNA	0.0297728	muscleskeletal
0.00115683	REACTOME_SYNTHESIS_OF_DNA	0.0299887	esophagusmucosa
0.000818833	REACTOME_BILE_ACID_AND_BILE_SALT_METABOLISM	0.0306607	adiposesubcutaneous
0.00395092	REACTOME_PYRIMIDINE_METABOLISM	0.0320834	wholeblood
0.00319839	REACTOME_INSULIN_RECEPTOR_SIGNALLING_CASCADE	0.0331648	muscleskeletal
0.00423117	REACTOME_SIGNAL_AMPLIFICATION	0.0335507	wholeblood
0.00423117	REACTOME_INTRINSIC_PATHWAY_FOR_APOPTOSIS	0.0335507	wholeblood
0.000306486	REACTOME_CLASS_B_2_SECRETIN_FAMILY_RECEPTORS	0.0344285	lung
0.00442891	REACTOME_ADP_SIGNALLING_THROUGH_P2RY12	0.034549	wholeblood
0.00453151	REACTOME_ANTIGEN_PROCESSING_CROSS_PRESENTATION	0.034549	wholeblood
0.00469299	REACTOME_PYRIMIDINE_CATABOLISM	0.034549	wholeblood
0.00469299	REACTOME_REGULATED_PROTEOLYSIS_OF_P75NTR	0.034549	wholeblood
0.00469299	REACTOME_RAF_MAP_KINASE_CASCADE	0.034549	wholeblood
0.00481841	REACTOME_PROTEOLYTIC_CLEAVAGE_OF_SNARE_COMPLEX_PROTEINS	0.034549	wholeblood
0.00481841	REACTOME_PRE_NOTCH_PROCESSING_IN_GOLGI	0.034549	wholeblood
0.00481841	REACTOME_PLATELET_SENSITIZATION_BY_LDL	0.034549	wholeblood
0.00481841	REACTOME_INFLAMMASOMES	0.034549	wholeblood
0.0019119	REACTOME_ELONGATION_ARREST_AND_RECOVERY	0.0348276	skins
0.0049836	REACTOME_GENERATION_OF_SECOND_MESSENGER_MOLECULES	0.0349998	wholeblood
0.00498513	REACTOME_SPRY_REGULATION_OF_FGF_SIGNALING	0.0349998	wholeblood
0.00150354	REACTOME_PHASE_II_CONJUGATION	0.0359957	esophagusmucosa
0.00154878	REACTOME_SPHINGOLIPID_DE_NOVO_BIOSYNTHESIS	0.0359957	esophagusmucosa
0.00154878	REACTOME_EXTENSION_OF_TELOMERES	0.0359957	esophagusmucosa
0.00366815	REACTOME_MYOGENESIS	0.0374596	muscleskeletal
0.00101252	REACTOME_DEVELOPMENTAL_BIOLOGY	0.0378732	arterytibial
0.00104907	REACTOME_INHIBITION_OF_INSULIN_SECRETION_BY_ADRENALINE_NORADRENALINE	0.0378732	arterytibial
0.00112383	REACTOME_P130CAS_LINKAGE_TO_MAPK_SIGNALING_FOR_INTEGRINS	0.0378732	arterytibial
0.00112383	REACTOME_GRB2_SOS_PROVIDES_LINKAGE_TO_MAPK_SIGNALING_FOR_INTERGRINS_	0.0378732	arterytibial
0.00551876	REACTOME_ANTIVIRAL_MECHANISM_BY_IFN_STIMULATED_GENES	0.0383468	wholeblood
0.00568674	REACTOME_CLASS_A1_RHODOPSIN_LIKE_RECEPTORS	0.0391109	wholeblood
0.00582186	REACTOME_LYSOSOME_VESICLE_BIOGENESIS	0.0394834	wholeblood
0.00585807	REACTOME_THROMBIN_SIGNALLING_THROUGH_PROTEINASE_ACTIVATED_RECEPTORS_PARS	0.0394834	wholeblood
0.00226911	REACTOME_DEADENYLATION_DEPENDENT_MRNA_DECAY	0.0402469	skins
0.00617243	REACTOME_CELL_CYCLE_MITOTIC	0.0411903	wholeblood
0.00117255	REACTOME_SULFUR_AMINO_ACID_METABOLISM	0.0415947	adiposesubcutaneous
0.00651387	REACTOME_RESPONSE_TO_ELEVATED_PLATELET_CYTOSOLIC_CA2_	0.0430426	wholeblood
0.00661435	REACTOME_PLATELET_HOMEOSTASIS	0.0432823	wholeblood
0.00671925	REACTOME_ANTIGEN_PRESENTATION_FOLDING_ASSEMBLY_AND_PEPTIDE_LOADING_OF_CLASS_I_MHC	0.0435459	wholeblood
0.00129542	REACTOME_G_ALPHA_Q_SIGNALLING_EVENTS	0.0436555	adiposesubcutaneous
0.00438106	REACTOME_YAP1_AND_WWTR1_TAZ_STIMULATED_GENE_EXPRESSION	0.0440722	muscleskeletal
0.00207007	REACTOME_GAP_JUNCTION_TRAFFICKING	0.0465075	esophagusmucosa
0.00279075	REACTOME_DOWNREGULATION_OF_ERBB2_ERBB3_SIGNALING	0.0480008	skins
0.00290471	REACTOME_MEMBRANE_BINDING_AND_TARGETTING_OF_GAG_PROTEINS	0.0480008	skins
0.00291993	REACTOME_RNA_POL_I_TRANSCRIPTION_TERMINATION	0.0480008	skins
0.00755312	REACTOME_G_ALPHA_Z_SIGNALLING_EVENTS	0.0483952	wholeblood
0.00761111	REACTOME_PROSTACYCLIN_SIGNALLING_THROUGH_PROSTACYCLIN_RECEPTOR	0.0483952	wholeblood
0.00224318	REACTOME_GAP_JUNCTION_ASSEMBLY	0.0487711	esophagusmucosa
0.00235372	REACTOME_E2F_ENABLED_INHIBITION_OF_PRE_REPLICATION_COMPLEX_FORMATION	0.048923	esophagusmucosa
0.00239534	REACTOME_METABOLISM_OF_LIPIDS_AND_LIPOPROTEINS	0.048923	esophagusmucosa
0.00504744	REACTOME_MRNA_SPLICING	0.050029	muscleskeletal
0.0015756	REACTOME_GASTRIN_CREB_SIGNALLING_PATHWAY_VIA_PKC_AND_MAPK	0.0505693	adiposesubcutaneous
0.0083164	REACTOME_EGFR_DOWNREGULATION	0.0516916	wholeblood
0.0083164	REACTOME_TRANSFERRIN_ENDOCYTOSIS_AND_RECYCLING	0.0516916	wholeblood
0.00835962	REACTOME_SOS_MEDIATED_SIGNALLING	0.0516916	wholeblood
0.00867812	REACTOME_GLYCOSPHINGOLIPID_METABOLISM	0.0526942	wholeblood
0.00867812	REACTOME_PLATELET_AGGREGATION_PLUG_FORMATION	0.0526942	wholeblood
0.00332253	REACTOME_RESPIRATORY_ELECTRON_TRANSPORT_ATP_SYNTHESIS_BY_CHEMIOSMOTIC_COUPLING_AND_HEAT_PRODUCTION_BY_UNCOUPLING_PROTEINS_	0.0533186	skins
0.00561537	REACTOME_METABOLISM_OF_RNA	0.0548516	muscleskeletal
0.00980804	REACTOME_SIGNALING_BY_NOTCH1	0.0568488	wholeblood
0.00981714	REACTOME_INSULIN_RECEPTOR_RECYCLING	0.0568488	wholeblood
0.00981714	REACTOME_G_PROTEIN_ACTIVATION	0.0568488	wholeblood
0.00981714	REACTOME_CTLA4_INHIBITORY_SIGNALING	0.0568488	wholeblood
0.00981714	REACTOME_THROMBOXANE_SIGNALLING_THROUGH_TP_RECEPTOR	0.0568488	wholeblood
0.00986842	REACTOME_PI_METABOLISM	0.0568488	wholeblood
0.000591478	REACTOME_VEGF_LIGAND_RECEPTOR_INTERACTIONS	0.0569509	lung
0.00598981	REACTOME_ENERGY_DEPENDENT_REGULATION_OF_MTOR_BY_LKB1_AMPK	0.0576734	muscleskeletal
0.00630351	REACTOME_CYTOSOLIC_TRNA_AMINOACYLATION	0.059839	muscleskeletal
0.0107106	REACTOME_GASTRIN_CREB_SIGNALLING_PATHWAY_VIA_PKC_AND_MAPK	0.0611773	wholeblood
0.010838	REACTOME_REGULATION_OF_INSULIN_SECRETION	0.0613852	wholeblood
0.00410178	REACTOME_MRNA_CAPPING	0.0614356	skins
0.00410178	REACTOME_FORMATION_OF_TRANSCRIPTION_COUPLED_NER_TC_NER_REPAIR_COMPLEX	0.0614356	skins
0.00410178	REACTOME_FORMATION_OF_THE_HIV1_EARLY_ELONGATION_COMPLEX	0.0614356	skins
0.0111233	REACTOME_SIGNALING_BY_RHO_GTPASES	0.0618132	wholeblood
0.011464	REACTOME_BOTULINUM_NEUROTOXICITY	0.0618132	wholeblood
0.011464	REACTOME_RIP_MEDIATED_NFKB_ACTIVATION_VIA_DAI	0.0618132	wholeblood
0.011464	REACTOME_G_BETA_GAMMA_SIGNALLING_THROUGH_PLC_BETA	0.0618132	wholeblood
0.011464	REACTOME_REGULATION_OF_SIGNALING_BY_CBL	0.0618132	wholeblood
0.0115556	REACTOME_ACTIVATED_NOTCH1_TRANSMITS_SIGNAL_TO_THE_NUCLEUS	0.0618132	wholeblood
0.0115556	REACTOME_IL_RECEPTOR_SHC_SIGNALING	0.0618132	wholeblood
0.00687748	REACTOME_RNA_POL_II_TRANSCRIPTION	0.0643809	muscleskeletal
0.00224949	REACTOME_CLASS_B_2_SECRETIN_FAMILY_RECEPTORS	0.06654	adiposesubcutaneous
0.0022932	REACTOME_LIPID_DIGESTION_MOBILIZATION_AND_TRANSPORT	0.06654	adiposesubcutaneous
0.00236938	REACTOME_DOWNSTREAM_SIGNALING_OF_ACTIVATED_FGFR	0.06654	adiposesubcutaneous
0.00208463	REACTOME_NITRIC_OXIDE_STIMULATES_GUANYLATE_CYCLASE	0.0669067	arterytibial
0.00339814	REACTOME_AMINO_ACID_SYNTHESIS_AND_INTERCONVERSION_TRANSAMINATION	0.0673632	esophagusmucosa
0.0128653	REACTOME_SEMA4D_IN_SEMAPHORIN_SIGNALING	0.0681876	wholeblood
0.0131519	REACTOME_SHC1_EVENTS_IN_EGFR_SIGNALING	0.0681876	wholeblood
0.0131519	REACTOME_RAP1_SIGNALLING	0.0681876	wholeblood
0.0131519	REACTOME_SHC_MEDIATED_SIGNALLING	0.0681876	wholeblood
0.0133023	REACTOME_INTEGRATION_OF_ENERGY_METABOLISM	0.0684409	wholeblood
0.0138784	REACTOME_EFFECTS_OF_PIP2_HYDROLYSIS	0.070048	wholeblood
0.0139144	REACTOME_SIGNALING_BY_EGFR_IN_CANCER	0.070048	wholeblood
0.0139264	REACTOME_OPIOID_SIGNALLING	0.070048	wholeblood
0.00760817	REACTOME_INTERACTION_BETWEEN_L1_AND_ANKYRINS	0.0702453	muscleskeletal
0.00518783	REACTOME_NEP_NS2_INTERACTS_WITH_THE_CELLULAR_EXPORT_MACHINERY	0.0713394	skins
0.00518783	REACTOME_TRANSPORT_OF_RIBONUCLEOPROTEINS_INTO_THE_HOST_NUCLEUS	0.0713394	skins
0.00518783	REACTOME_REGULATION_OF_GLUCOKINASE_BY_GLUCOKINASE_REGULATORY_PROTEIN	0.0713394	skins
0.00529224	REACTOME_PROCESSING_OF_INTRONLESS_PRE_MRNAS	0.0713394	skins
0.00529224	REACTOME_REPAIR_SYNTHESIS_FOR_GAP_FILLING_BY_DNA_POL_IN_TC_NER	0.0713394	skins
0.000847318	REACTOME_G_ALPHA_Q_SIGNALLING_EVENTS	0.0713865	lung
0.00786548	REACTOME_PI3K_CASCADE	0.0716396	muscleskeletal
0.00243587	REACTOME_G_PROTEIN_ACTIVATION	0.0720333	arterytibial
0.00245811	REACTOME_INTEGRATION_OF_ENERGY_METABOLISM	0.0720333	arterytibial
0.014652	REACTOME_TRANSCRIPTION	0.0730329	wholeblood
0.0148397	REACTOME_CELL_DEATH_SIGNALLING_VIA_NRAGE_NRIF_AND_NADE	0.0730329	wholeblood
0.0150944	REACTOME_MAP_KINASE_ACTIVATION_IN_TLR_CASCADE	0.0730329	wholeblood
0.0150944	REACTOME_APOPTOTIC_EXECUTION_PHASE	0.0730329	wholeblood
0.0152784	REACTOME_COPI_MEDIATED_TRANSPORT	0.0730329	wholeblood
0.0152784	REACTOME_NEF_MEDIATED_DOWNREGULATION_OF_MHC_CLASS_I_COMPLEX_CELL_SURFACE_EXPRESSION	0.0730329	wholeblood
0.0152784	REACTOME_MEMBRANE_BINDING_AND_TARGETTING_OF_GAG_PROTEINS	0.0730329	wholeblood
0.00393162	REACTOME_GLUCURONIDATION	0.0757117	esophagusmucosa
0.0165804	REACTOME_CHONDROITIN_SULFATE_BIOSYNTHESIS	0.0786983	wholeblood
0.00432071	REACTOME_CELL_CELL_JUNCTION_ORGANIZATION	0.0808932	esophagusmucosa
0.017198	REACTOME_PEPTIDE_LIGAND_BINDING_RECEPTORS	0.0810591	wholeblood
0.00301642	REACTOME_CA_DEPENDENT_EVENTS	0.0813226	adiposesubcutaneous
0.00636085	REACTOME_FANCONI_ANEMIA_PATHWAY	0.084063	skins
0.0182394	REACTOME_RNA_POL_I_RNA_POL_III_AND_MITOCHONDRIAL_TRANSCRIPTION	0.0842899	wholeblood
0.0182587	REACTOME_PRE_NOTCH_EXPRESSION_AND_PROCESSING	0.0842899	wholeblood
0.0182587	REACTOME_REGULATION_OF_INSULIN_SECRETION_BY_GLUCAGON_LIKE_PEPTIDE1	0.0842899	wholeblood
0.00350825	REACTOME_G_ALPHA1213_SIGNALLING_EVENTS	0.0851264	adiposesubcutaneous
0.00357662	REACTOME_GLYCEROPHOSPHOLIPID_BIOSYNTHESIS	0.0851264	adiposesubcutaneous
0.00360601	REACTOME_ETHANOL_OXIDATION	0.0851264	adiposesubcutaneous
0.00366271	REACTOME_MITOCHONDRIAL_FATTY_ACID_BETA_OXIDATION	0.0851264	adiposesubcutaneous
0.00379112	REACTOME_INHIBITION_OF_INSULIN_SECRETION_BY_ADRENALINE_NORADRENALINE	0.0851738	adiposesubcutaneous
0.0186063	REACTOME_METABOLISM_OF_CARBOHYDRATES	0.0853104	wholeblood
0.0190576	REACTOME_ADP_SIGNALLING_THROUGH_P2RY1	0.0862067	wholeblood
0.0190576	REACTOME_TAK1_ACTIVATES_NFKB_BY_PHOSPHORYLATION_AND_ACTIVATION_OF_IKKS_COMPLEX	0.0862067	wholeblood
0.00473408	REACTOME_PHASE1_FUNCTIONALIZATION_OF_COMPOUNDS	0.086237	esophagusmucosa
0.00490793	REACTOME_TIGHT_JUNCTION_INTERACTIONS	0.0870513	esophagusmucosa
0.00402181	REACTOME_HEMOSTASIS	0.0874418	adiposesubcutaneous
0.0196335	REACTOME_SHC_RELATED_EVENTS	0.0882199	wholeblood
0.0051685	REACTOME_APOPTOTIC_EXECUTION_PHASE	0.0893223	esophagusmucosa
0.00424251	REACTOME_SIGNALING_BY_PDGF	0.0893578	adiposesubcutaneous
0.0207613	REACTOME_INTEGRIN_ALPHAIIB_BETA3_SIGNALING	0.0923847	wholeblood
0.0208345	REACTOME_CLASS_I_MHC_MEDIATED_ANTIGEN_PROCESSING_PRESENTATION	0.0923847	wholeblood
0.0033993	REACTOME_REGULATION_OF_INSULIN_SECRETION	0.0954637	arterytibial
0.0223849	REACTOME_DIABETES_PATHWAYS	0.096401	wholeblood
0.0224952	REACTOME_IRON_UPTAKE_AND_TRANSPORT	0.096401	wholeblood
0.0228845	REACTOME_RETROGRADE_NEUROTROPHIN_SIGNALLING	0.096401	wholeblood
0.0228845	REACTOME_TRAF3_DEPENDENT_IRF_ACTIVATION_PATHWAY	0.096401	wholeblood
0.0228845	REACTOME_N_GLYCAN_ANTENNAE_ELONGATION	0.096401	wholeblood
0.0228845	REACTOME_ACTIVATION_OF_IRF3_IRF7_MEDIATED_BY_TBK1_IKK_EPSILON	0.096401	wholeblood
0.0228845	REACTOME_ADVANCED_GLYCOSYLATION_ENDPRODUCT_RECEPTOR_SIGNALING	0.096401	wholeblood
0.0228845	REACTOME_EARLY_PHASE_OF_HIV_LIFE_CYCLE	0.096401	wholeblood
0.0230609	REACTOME_BINDING_AND_ENTRY_OF_HIV_VIRION	0.0965408	wholeblood
0.00475483	REACTOME_PLATELET_HOMEOSTASIS	0.0971139	adiposesubcutaneous
0.0036066	REACTOME_CHONDROITIN_SULFATE_DERMATAN_SULFATE_METABOLISM	0.0972338	arterytibial
0.00796043	REACTOME_SYNTHESIS_OF_PIPS_AT_THE_GOLGI_MEMBRANE	0.0993579	skins
0.00796043	REACTOME_DESTABILIZATION_OF_MRNA_BY_BRF1	0.0993579	skins
0.00796043	REACTOME_DESTABILIZATION_OF_MRNA_BY_TRISTETRAPROLIN_TTP	0.0993579	skins
