# Supplementary material for: Telescoping bimodal latent Dirichlet allocation to identify expression QTLs across tissues
Source: Life Sci Alliance. 2022 Aug 17;5(12):e202101297. doi: 10.26508/lsa.202101297 (PMC9387650; doi:10.26508/lsa.202101297)
Supplement: Supplementary file 3 [file LSA-2021-01297_TableS3.xls]

## Sheet: All Tissue-Associated SNPs Chro
Chromosome	Start_Position	Fisher_pval	BH_FDR	Tissue
4	7572156	1.41087e-08	2.68065e-05	adiposesubcutaneous
4	7472156	2.35133e-07	0.000223376	adiposesubcutaneous
4	4172156	1.13807e-06	0.000720776	adiposesubcutaneous
4	185872156	1.9053e-06	0.00362006	skins
5	5178839	5.89627e-06	0.010684	esophagusmucosa
16	52233887	6.15986e-06	0.00555003	skinnotsunexposedsuprapubic
8	1831662	9.79664e-06	0.00735914	skins
4	4272156	9.85275e-06	0.00468006	adiposesubcutaneous
1	95717341	1.00436e-05	0.0249181	nervetibial
8	1931662	1.01575e-05	0.00735914	skins
8	6231662	1.23058e-05	0.0178311	arterytibial
6	39156003	1.31375e-05	0.0223995	skinnotsunexposedsuprapubic
4	10072156	1.35563e-05	0.0257569	lung
4	188872156	1.6994e-05	0.0322886	skinsunexposedlowerleg
20	9768303	1.88806e-05	0.0121402	thyroid
4	7672156	2.35898e-05	0.00896413	adiposesubcutaneous
16	6433887	2.80169e-05	0.0252432	skinsunexposedlowerleg
9	89788254	2.83878e-05	0.0392319	nervetibial
2	74740569	2.86842e-05	0.0395481	thyroid
6	137456003	2.91344e-05	0.0248371	skinnotsunexposedsuprapubic
1	15017341	3.0157e-05	0.0748196	arterytibial
4	177372156	3.12337e-05	0.00989069	adiposesubcutaneous
2	133640569	3.26709e-05	0.0395481	thyroid
5	157878839	3.28946e-05	0.059605	skins
12	129484145	3.30044e-05	0.0439619	wholeblood
3	11817058	3.63173e-05	0.0719446	adiposesubcutaneous
8	15331662	3.73533e-05	0.0270625	arterytibial
4	87472156	4.23406e-05	0.0114924	adiposesubcutaneous
14	88992448	4.62858e-05	0.0420275	nervetibial
4	188272156	4.87079e-05	0.0462726	lung
7	7742920	5.34818e-05	0.0851964	skins
9	38488254	5.43783e-05	0.0751508	wholeblood
4	188472156	5.45e-05	0.051775	skins
1	40717341	5.67458e-05	0.0643406	nervetibial
4	183472156	6.47479e-05	0.0562426	skinnotsunexposedsuprapubic
4	37172156	7.01845e-05	0.0562426	skinnotsunexposedsuprapubic
1	154617341	7.77999e-05	0.0643406	nervetibial
6	37556003	7.83001e-05	0.0392366	skinnotsunexposedsuprapubic
4	89072156	7.87798e-05	0.0167426	adiposesubcutaneous
4	26772156	7.9307e-05	0.0167426	adiposesubcutaneous
18	12182931	8.92587e-05	0.0715855	arterytibial
6	44056003	9.31294e-05	0.0818017	thyroid
2	166240569	9.39461e-05	0.0594784	thyroid
8	13031662	9.43258e-05	0.0699109	nervetibial
6	456003	9.59551e-05	0.0818017	thyroid
4	37572156	9.62302e-05	0.0914187	skinsunexposedlowerleg
8	93231662	9.64954e-05	0.0699109	nervetibial
8	15431662	9.73812e-05	0.0470351	arterytibial
2	74640569	9.82708e-05	0.0594784	thyroid
17	34345325	9.99295e-05	0.0830414	lung
14	94492448	0.000102294	0.0928827	esophagusmucosa
6	23256003	0.000115063	0.0392366	skinnotsunexposedsuprapubic
6	31056003	0.000115063	0.0392366	skinnotsunexposedsuprapubic
4	160172156	0.000124358	0.0236281	adiposesubcutaneous
4	168472156	0.000130179	0.0562426	skinnotsunexposedsuprapubic
4	188872156	0.000130179	0.0562426	skinnotsunexposedsuprapubic
16	5433887	0.000130179	0.0453447	skinnotsunexposedsuprapubic
6	152956003	0.000139029	0.0395075	skinnotsunexposedsuprapubic
4	69372156	0.000147878	0.093656	skinsunexposedlowerleg
4	183472156	0.000149003	0.0811377	skins
8	93131662	0.000160465	0.0775045	nervetibial
4	37572156	0.000161131	0.0562426	skinnotsunexposedsuprapubic
4	188572156	0.000170816	0.0811377	skins
4	54572156	0.000171519	0.029626	adiposesubcutaneous
4	74372156	0.000177608	0.0562426	skinnotsunexposedsuprapubic
16	47033887	0.000181466	0.0453447	skinnotsunexposedsuprapubic
6	23356003	0.000183468	0.0423919	skinnotsunexposedsuprapubic
4	26672156	0.000192383	0.0304607	adiposesubcutaneous
14	70692448	0.000193957	0.0666557	adiposesubcutaneous
16	6433887	0.000202146	0.0453447	skinnotsunexposedsuprapubic
8	71131662	0.000209277	0.0758105	arterytibial
9	131388254	0.000210759	0.0970896	nervetibial
9	131488254	0.000210759	0.0970896	nervetibial
21	34566198	0.000215092	0.0623673	nervetibial
6	37456003	0.00021782	0.0423919	skinnotsunexposedsuprapubic
6	12156003	0.000228163	0.0423919	skinnotsunexposedsuprapubic
8	105331662	0.000243876	0.080879	nervetibial
6	89956003	0.000258831	0.0423919	skinnotsunexposedsuprapubic
4	54672156	0.000263349	0.0352255	adiposesubcutaneous
14	70792448	0.000263349	0.0666557	adiposesubcutaneous
4	36972156	0.000269514	0.0352255	adiposesubcutaneous
6	15456003	0.000273496	0.0423919	skinnotsunexposedsuprapubic
4	65172156	0.000279125	0.0352255	adiposesubcutaneous
14	104692448	0.000279125	0.0666557	adiposesubcutaneous
14	94492448	0.000293637	0.0666557	adiposesubcutaneous
4	186772156	0.000300697	0.0352255	adiposesubcutaneous
16	16633887	0.000301962	0.0453447	skinnotsunexposedsuprapubic
16	52333887	0.000301962	0.0453447	skinnotsunexposedsuprapubic
4	7372156	0.000315176	0.0352255	adiposesubcutaneous
8	731662	0.000334903	0.080879	nervetibial
8	105431662	0.000334903	0.080879	nervetibial
6	163156003	0.000346042	0.0448558	skinnotsunexposedsuprapubic
6	31156003	0.000350489	0.0448558	skinnotsunexposedsuprapubic
21	18266198	0.000378418	0.0623673	nervetibial
6	7856003	0.000381723	0.0448558	skinnotsunexposedsuprapubic
16	55633887	0.000381723	0.0491333	skinnotsunexposedsuprapubic
4	185972156	0.000383804	0.0394098	adiposesubcutaneous
4	7272156	0.000394098	0.0394098	adiposesubcutaneous
6	99056003	0.000394626	0.0448558	skinnotsunexposedsuprapubic
6	31256003	0.000426649	0.0454648	skinnotsunexposedsuprapubic
4	56472156	0.000459392	0.0416711	adiposesubcutaneous
4	13672156	0.000460576	0.0416711	adiposesubcutaneous
21	18166198	0.000518288	0.0623673	nervetibial
4	19472156	0.000524847	0.0434283	adiposesubcutaneous
4	177272156	0.000538118	0.0434283	adiposesubcutaneous
4	7972156	0.000548568	0.0434283	adiposesubcutaneous
16	84233887	0.00056716	0.0598869	skinnotsunexposedsuprapubic
6	137356003	0.000578421	0.0580123	skinnotsunexposedsuprapubic
16	84133887	0.000598205	0.0598869	skinnotsunexposedsuprapubic
4	84072156	0.000611886	0.0465033	adiposesubcutaneous
6	139156003	0.000641726	0.0600888	skinnotsunexposedsuprapubic
4	112972156	0.000653913	0.0469126	adiposesubcutaneous
6	98956003	0.000669611	0.0600888	skinnotsunexposedsuprapubic
4	89172156	0.000706325	0.0469126	adiposesubcutaneous
4	154872156	0.000708968	0.0469126	adiposesubcutaneous
4	25672156	0.000716035	0.0469126	adiposesubcutaneous
4	6672156	0.000753399	0.0477153	adiposesubcutaneous
4	182572156	0.000833964	0.0511139	adiposesubcutaneous
6	89856003	0.000956485	0.0815403	skinnotsunexposedsuprapubic
4	125772156	0.000962033	0.0571207	adiposesubcutaneous
4	182472156	0.000994963	0.0572857	adiposesubcutaneous
4	112872156	0.00104619	0.0584636	adiposesubcutaneous
6	72556003	0.00108976	0.0873624	skinnotsunexposedsuprapubic
6	33756003	0.0012491	0.0873624	skinnotsunexposedsuprapubic
6	23156003	0.00127764	0.0873624	skinnotsunexposedsuprapubic
6	10056003	0.00131367	0.0873624	skinnotsunexposedsuprapubic
6	148456003	0.00133221	0.0873624	skinnotsunexposedsuprapubic
6	166456003	0.00133221	0.0873624	skinnotsunexposedsuprapubic
6	39656003	0.00148499	0.0935943	skinnotsunexposedsuprapubic
4	13572156	0.00160089	0.0856642	adiposesubcutaneous
4	35072156	0.00163386	0.0856642	adiposesubcutaneous
4	13772156	0.0016682	0.0856642	adiposesubcutaneous
4	135072156	0.00171908	0.0859541	adiposesubcutaneous
6	167456003	0.00171986	0.0935943	skinnotsunexposedsuprapubic
6	39056003	0.00180489	0.0935943	skinnotsunexposedsuprapubic
4	185472156	0.00180982	0.0863249	adiposesubcutaneous
4	186872156	0.00181737	0.0863249	adiposesubcutaneous
6	39256003	0.0018248	0.0935943	skinnotsunexposedsuprapubic
6	99756003	0.0018248	0.0935943	skinnotsunexposedsuprapubic
6	9956003	0.00184923	0.0935943	skinnotsunexposedsuprapubic
6	139356003	0.00184923	0.0935943	skinnotsunexposedsuprapubic
6	139256003	0.0018664	0.0935943	skinnotsunexposedsuprapubic
4	19572156	0.00188202	0.0872156	adiposesubcutaneous
6	69856003	0.00197661	0.0962893	skinnotsunexposedsuprapubic
4	7872156	0.00201356	0.0910897	adiposesubcutaneous
4	185872156	0.00211923	0.0927244	adiposesubcutaneous
4	189072156	0.0021473	0.0927244	adiposesubcutaneous
